# Supplementary material for: Phylogenomic Analyses and Molecular Signatures Elucidating the Evolutionary Relationships amongst the Chlorobia and Ignavibacteria Species: Robust Demarcation of Two Family-Level Clades within the Order Chlorobiales and Proposal for the Family Chloroherpetonaceae fam. nov
Source: MDPI journal article supplement (doi:10.3390/microorganisms10071312), 2022-06-29
Supplement: s1 [file s1]

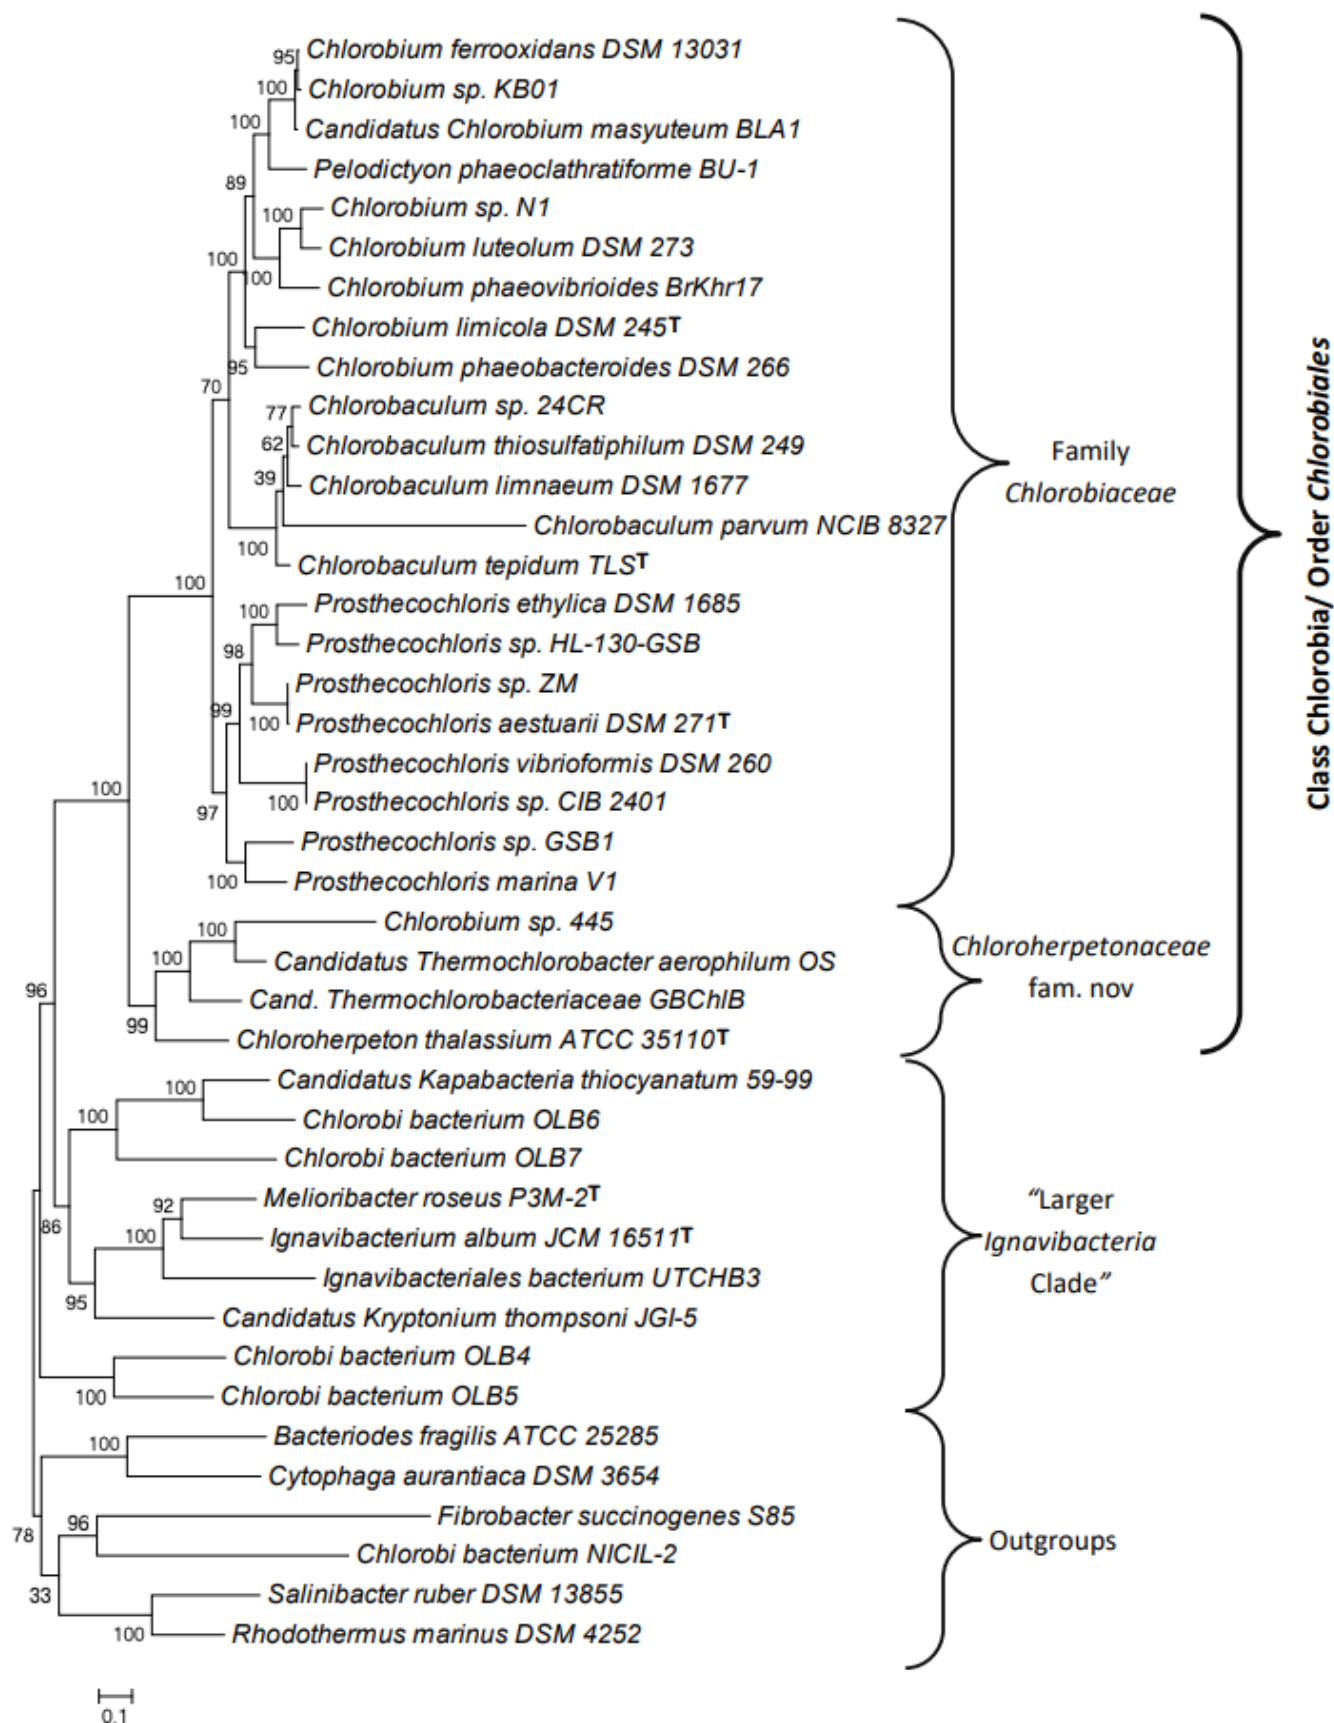

Figure S1

A bootstrapped maximum likelihood tree for different genomes-sequenced Chlorobia/Ignavibacteria and related species/strains based on concatenated sequences of UvrD and PolA proteins. Statistical support values for different branches are indicated on the nodes. The tree was rooted using the sequences from the species *Fibrobacter succinogenes*. The type strains of different species are marked by the superscript "T". Some species clades observed in this tree are marked.

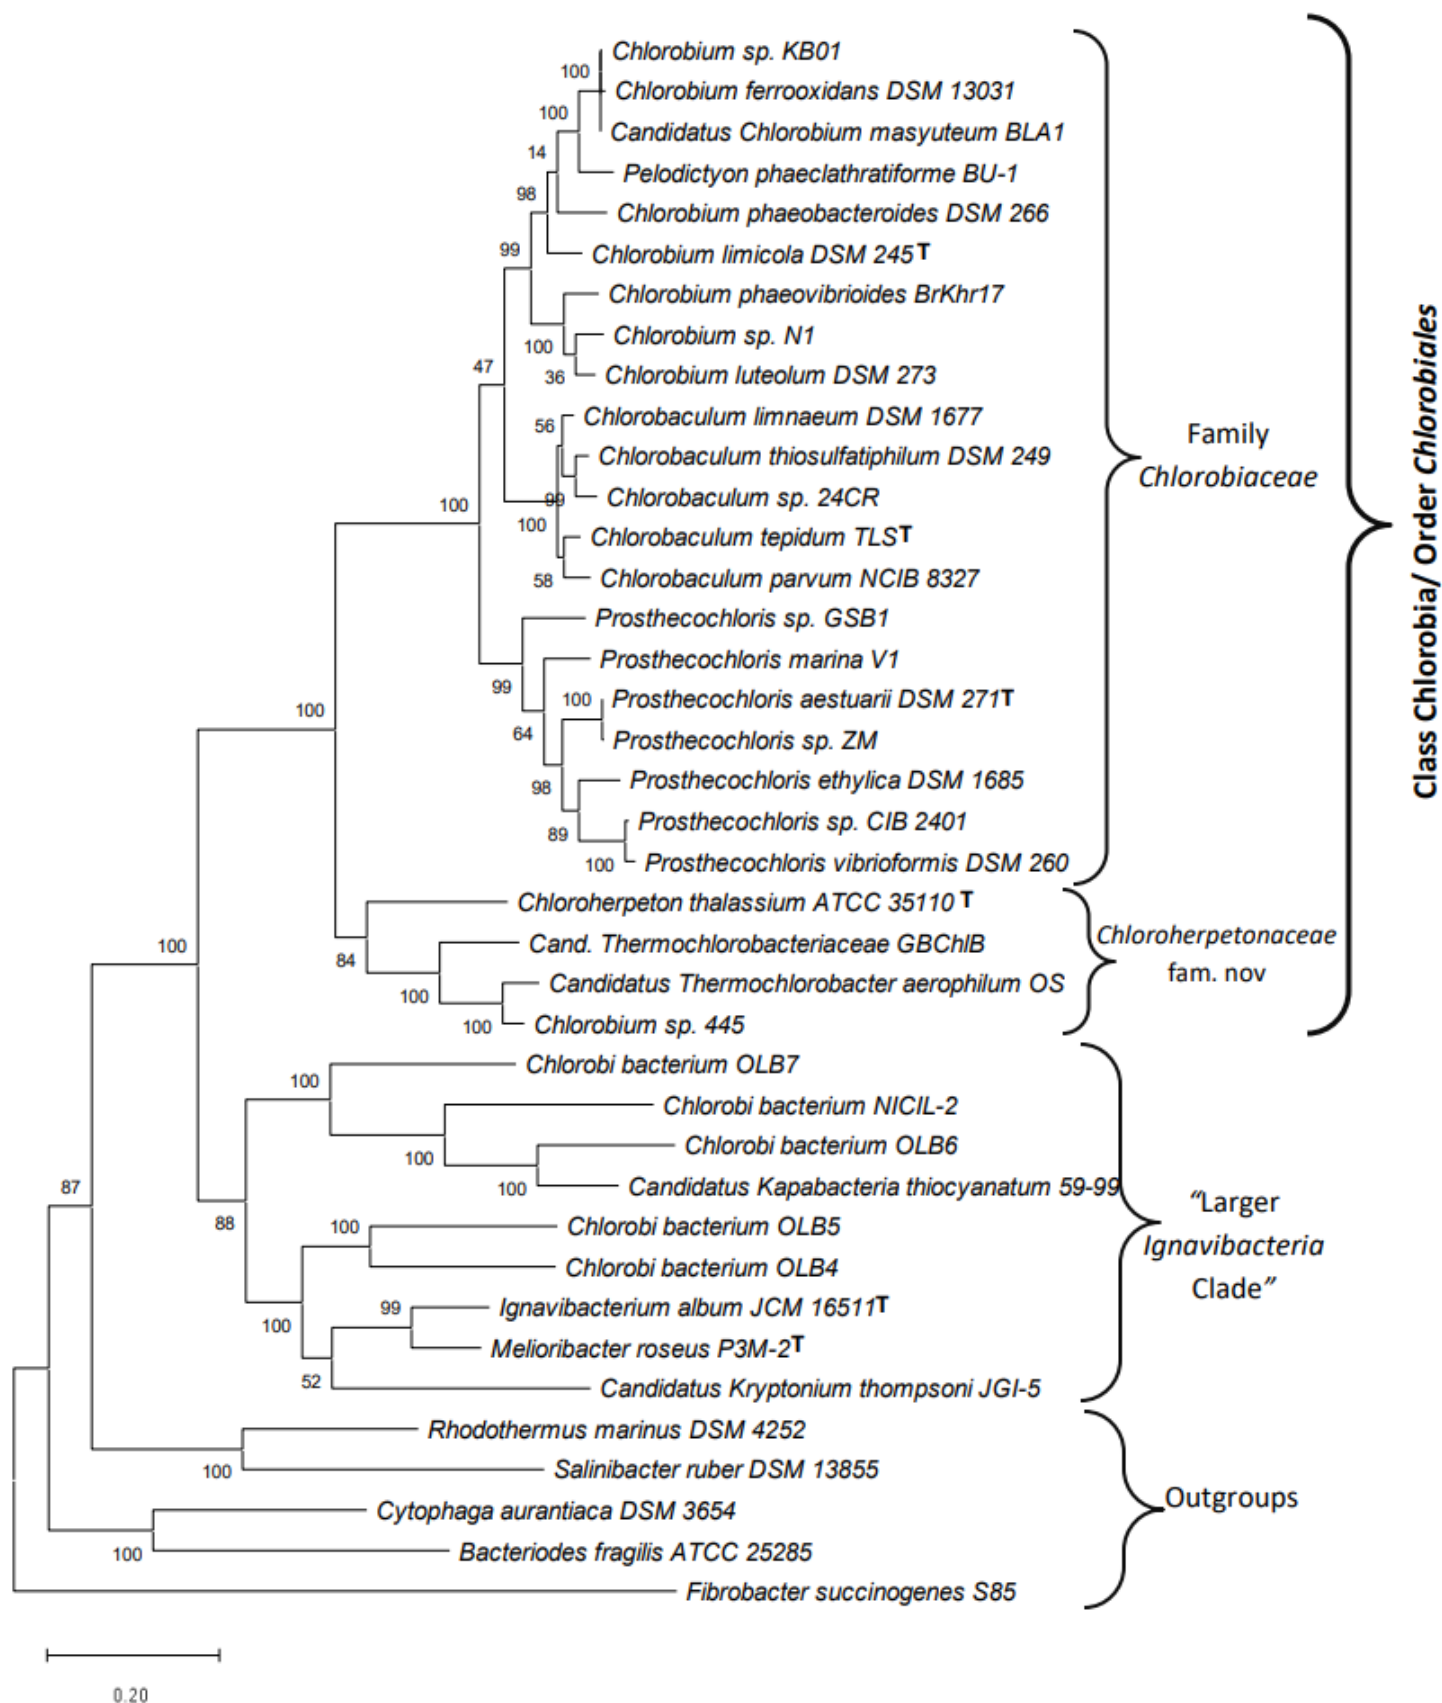

Figure S2

A bootstrapped maximum likelihood tree for different genomes-sequenced Chlorobia/Ignavibacteria and related species/strains based on concatenated sequences of GyrA and Gyr B proteins. Statistical support values for different branches are indicated on the nodes. The tree was rooted using the sequences from the species *Fibrobacter succinogenes*. The type strains of different species are marked by the superscript "T". Some species clades observed in this tree are marked.

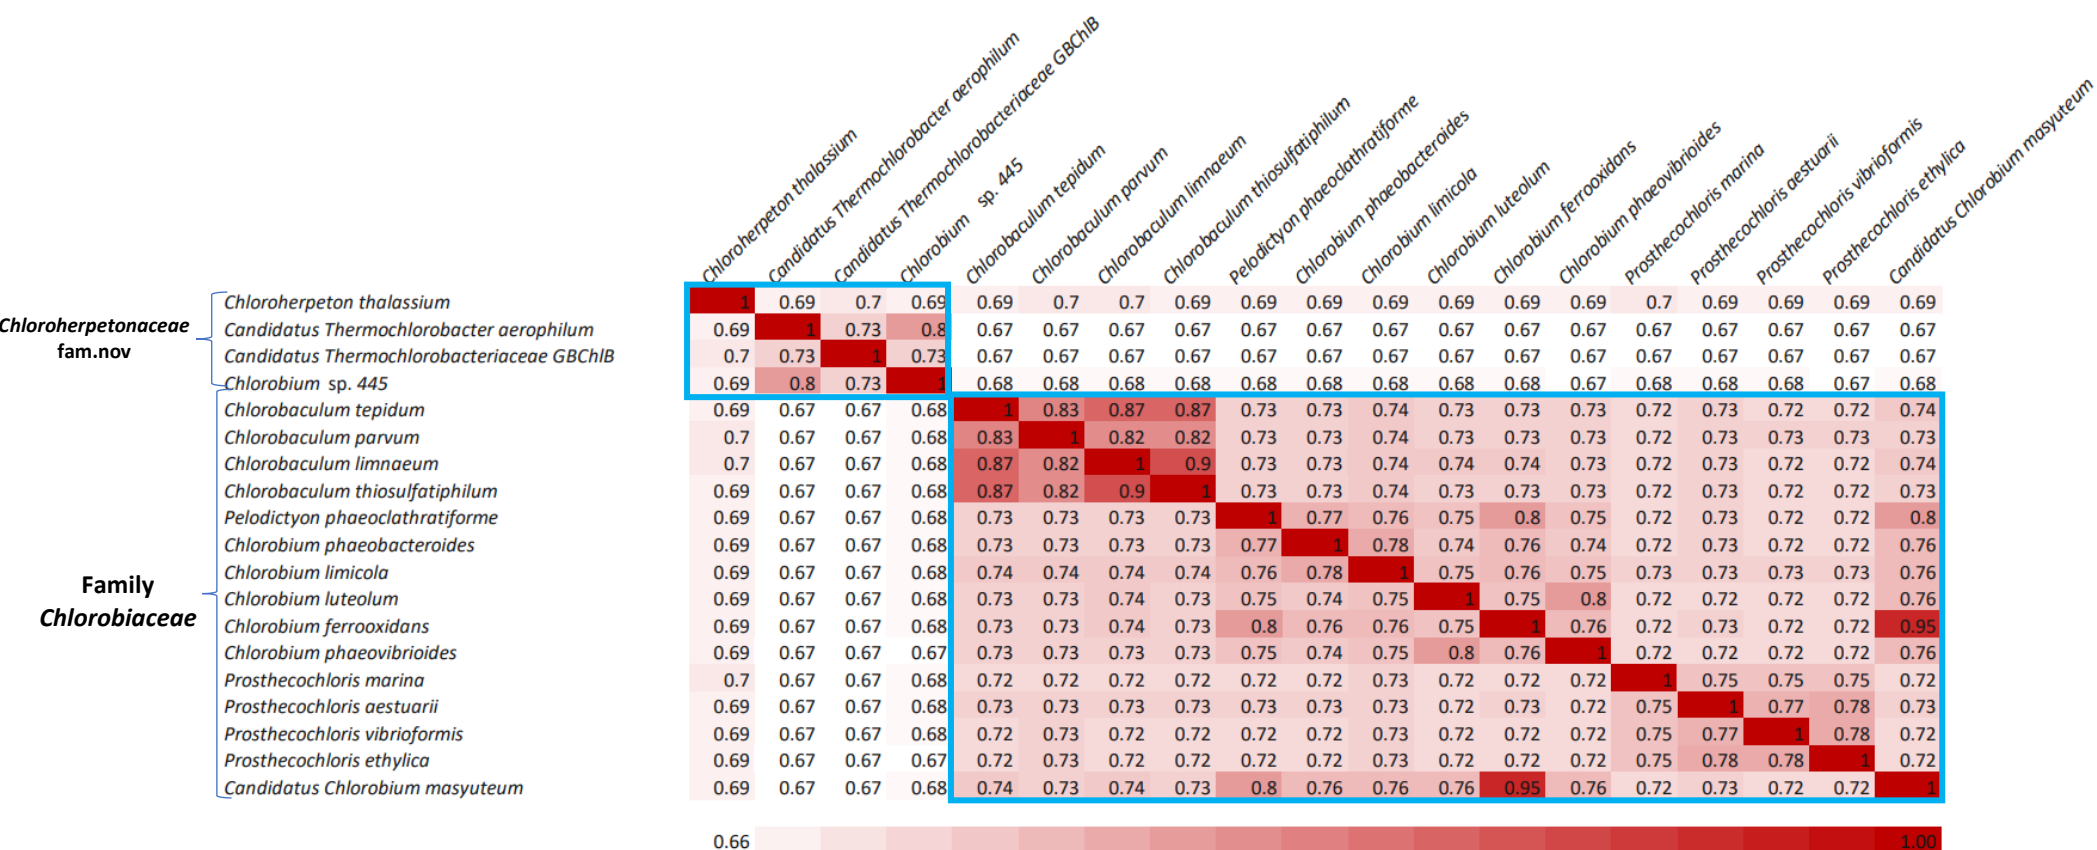

Figure S3

AAI matrix indicating the pairwise percentage average amino acid identities based on 355 core proteins for the type species of different genera within the order *Chlorobiales*. Genome pairs sharing higher amino acid identity are shaded more darkly (red). The regions of the matrix corresponding to species from different proposed families are labeled

|                                           |                                                 | 248        | 314                                                     |
|-------------------------------------------|-------------------------------------------------|------------|---------------------------------------------------------|
| Order<br><i>Chlorobiales</i>              | <i>Chlorobium luteolum</i>                      | 78185909   | EFEQMEMQYFVKPGTQAEAFEAWREERYQWY T RQLGIRPEKLHWYKHKDLAHY |
|                                           | <i>Chlorobium chlorochromatii</i>               | 78188020   | -----L-----FA-- V NS---T-S-----                         |
|                                           | <i>Chlorobium phaeovibrioides</i>               | 145218843  | -----V-----FN-- SS---S-----                             |
|                                           | <i>Chlorobium phaeoclathratiforme</i>           | 194335210  | -----FA-- SA--L-K-----                                  |
|                                           | <i>Chlorobium phaeobacteroides</i>              | 119355895  | -----FN-- SA---NRD-----                                 |
|                                           | <i>Chlorobium limicola</i>                      | 189345581  | -----S-I-----FN-- V TE---TQ-----                        |
|                                           | <i>Chlorobaculum parvum</i>                     | 193211698  | -----L-----FR-- S ET--MTK-----                          |
|                                           | <i>Chlorobaculum tepidum</i>                    | 21675063   | -----L-----FR-- S ET--MSK-----                          |
|                                           | <i>Prosthecochloris aestuarii</i>               | 194332877  | -----K-T-----FN-- K ER--LT-G-----                       |
|                                           | <i>Chlorobium ferrooxidans</i>                  | 493410795  | -----KG-----FA-- S TA--L-A-----                         |
|                                           | <i>Chloroherpeton thalassium</i>                | 193214675  | -----M---E---R-MS-- - ES--SK-----Q----                  |
|                                           | <i>Chlorobaculum limnaeum</i>                   | 2501895760 | -----L-----FR-- S ET--MTK-----                          |
|                                           | <i>Candidatus Chlorobium masyuteum</i>          | 166807360  | -----K-----FA-- S AT--L-A-----                          |
|                                           | <i>Chlorobaculum thiosulfatophilum</i>          | 170181247  | -----L-----FR-- S ET--MTR-----                          |
|                                           | <i>Prosthecochloris marina</i>                  | 161953525  | -----G-S-----N-- I EK--ER-----                          |
|                                           | <i>Candidatus Thermochlorobacter GBChLB</i>     | KER10651   | -----I---A-K---SM-Q-K-FN-- A DY---NT-N-V---Q-----       |
|                                           | <i>Candidatus Thermochlorobacter aerophilum</i> | RFM23176   | -----R-E-MA---M-Q-Q-MK-- - EC--FKK-N-V-----             |
|                                           | <i>Chlorobium sp. N1</i>                        | 165498823  | -----T-----G-- - A--LS-----                             |
|                                           | <i>Chlorobium sp. KB01</i>                      | 076789630  | -----K---E---T-FA-- S TT--L-A-----                      |
|                                           | <i>Chlorobium sp. 445</i>                       | PI048809   | -----V-L---M-Q-R-MK-- A ER--LK--N-S-----                |
|                                           | <i>Prosthecochloris sp. HL-130-GSB</i>          | 085658738  | -----L-T-----FN-- V KS--S-D---R-----                    |
|                                           | <i>Chlorobaculum sp. 24CR</i>                   | 167599212  | -----L-----FR-- S ET--MTR-----                          |
|                                           | <i>Prosthecochloris sp. ZM</i>                  | 114617902  | -----K-T-DA---FN-- K ER--LT-G-----                      |
|                                           | <i>Prosthecochloris sp. GSB1</i>                | 094081604  | -----A-E-----FN-- V ER--GQ-----R-----                   |
| Larger<br><i>Ignavibacteriae</i><br>Clade | <i>Chlorobi bacterium OLB4</i>                  | KXK01802   | -----F---DDS-W--Y-K-Q-I--F EKY-M-K---KF-E-E----         |
|                                           | <i>Chlorobi bacterium OLB6</i>                  | KXK33418   | -----F-IA---D-W--Y-AA-WE-L VN--LT--N-RRKP-E----         |
|                                           | <i>Chlorobi bacterium OLB7</i>                  | KXK53003   | -----F---ED-KWYDY--Q-WN-- -D--MQM-R-RMKP-E----          |
|                                           | <i>Segetibacter koreensis</i>                   | 517441118  | -----F--R---EG-WYRY-K-A-L--H LS---S-K-YRYHD-V----       |
| Other Bacteria                            | <i>Solitalea canadensis</i>                     | 387789634  | -----F--R---EM-WYNY-K-A-LK-H KA--TD---YRYHD-T----       |
|                                           | <i>Hymenobacter norwichensis</i>                | 551197521  | -----F--R---EG-WY-H-KAT-RA-H EAM--PTN--RFHD-----        |
|                                           | <i>Arcticibacter svalbardensis</i>              | 510820536  | -----F--R---EDKKW-DY-KIA-LK-H TA--TSS--YRFHD-V----      |
|                                           | <i>Mucilaginibacter paludis</i>                 | 495781065  | -----F-IR---EM-WY-Y-KAA-LK-H VA--TD-A-YQYHD-A----       |
|                                           | <i>Flexithrix dorotheae</i>                     | 522015193  | -----F--R---SEM-WY-K-KAQ-MA-H TV--TD---RFHD-----        |
|                                           | <i>Joostella marina</i>                         | 495886513  | -----F-I---K-WYDY-K-T-LK-H MS--MGE-NYRFHD-E----         |
|                                           | <i>Chitinophaga pinensis</i>                    | 256419457  | -----F--R---K-W-AY-K---LK-H KS---D-D-YRFHV-----F-       |
|                                           | <i>Pedobacter heparinus</i>                     | 255533134  | -----F--R---EDKKW-AY-K-A-LK-H LA--TPA--YRYHD-V----      |
|                                           | <i>Porphyromonas endodontalis</i>               | 490463729  | -----F--A---EEMKW--Y-KKT-MAFH KS--LGDN-YRYHD-E----      |
|                                           | <i>Dyadobacter fermentans</i>                   | 255038651  | -----F--R---EQ-WY-K-K-A-LKFH KAI-LPA---KYHD-----        |
|                                           | <i>Dyadobacter beijingensis</i>                 | 518785017  | -----F--R---EE-WYNK-K-A-LKFH KAI-LPA---KYHD-----        |
|                                           | <i>Anaerophaga thermohalophila</i>              | 515149603  | -----F--R---EEM-W-NY-KQV-MK-H KA--MGED-YRFHD-----       |
|                                           | <i>Flavobacterium columnare</i>                 | 365960887  | -----F---EEMKWY-Y-KQT-LK-H KS--LGA-NYRYHD-E----         |
|                                           | <i>Lewinella cohaerens</i>                      | 522025975  | -----F-IQ---KKWYDY-K-A-LK-H LA--TSAS-YRFHD--N----       |
|                                           | <i>Paludibacter propioniciogenes</i>            | 313204242  | -----F--R---EEMKW--H-KAF-LK-H KA--LGDQ-YRFHD-----       |
|                                           | <i>Porphyromonas catoniae</i>                   | 491610397  | -----F--R---EELKW-DF-KDL-LR-H KA--LGDK-YRFHD-E----      |
|                                           | <i>Anaerophaga thermohalophila</i>              | 498104982  | -----F--R---EEM-W-NY-KQV-MK-H KA--MGE--YRFHD-----       |
|                                           | <i>Mariniradius saccharolyticus</i>             | 495906476  | -----F--R---SELDWYKE-AAT-M--H KA--PE---RRHD-E----       |

Figure S4

Partial sequence alignment of the protein Glycine-tRNA synthetase showing a 1 aa insertion (boxed) that is specific for the order *Chlorobiales*

|                                           |                                              |            |                          |              |                      |
|-------------------------------------------|----------------------------------------------|------------|--------------------------|--------------|----------------------|
| Order<br><i>Chlorobiales</i>              | <i>Chlorobaculum parvum</i>                  | 193212077  | EIGKYDLLTAEDVKLTMAIKEG   | YDMPVDTVEYKR | AKRALDKLIKGNLRFVSVAK |
|                                           | <i>Chlorobium limicola</i>                   | 189345950  | -----D-----              | -----P-----  | -----                |
|                                           | <i>Prosthecochloris aestuarii</i>            | 194334634  | -----E-----              | -----P-----  | -----                |
|                                           | <i>Chlorobium phaeoclathratiforme</i>        | 194337394  | -----K-----              | F-----T----- | -----                |
|                                           | <i>Chlorobium ferrooxidans</i>               | 493409341  | -----K--D--              | F-----T----- | -----                |
|                                           | <i>Chlorobium chlorochromatii</i>            | 78188365   | -----R-K-----            | F-----P----- | -----                |
|                                           | <i>Chlorobium luteolum</i>                   | 78186275   | -----D--R-K--            | F-----T----- | -----                |
|                                           | <i>Chlorobium phaeobacteroides</i>           | 189500956  | -----E-----K--A-         | -----T-----  | -----                |
|                                           | <i>Chlorobium phaeovibrioides</i>            | 145219258  | -----D--R-K--            | F--L--T--    | -----                |
|                                           | <i>Chlorobaculum tepidum</i>                 | 1519644    | -----RRRGEAHEGH--        | -----R-----  | -----                |
|                                           | <i>Chlorobaculum limnaeum</i>                | 2501895477 | -----K-----              | -----P-----  | -----                |
|                                           | <i>Prosthecochloris marina</i>               | 110022354  | -----E-----K--           | -----P-----  | -----                |
|                                           | <i>Chloroherpeton thalassium</i>             | 193216316  | ----F----QE-IE--RQ-K-    | DGQ-I-SK--RE | -R--E--A-----        |
|                                           | <i>Chlorobium sp. N1</i>                     | 131356747  | -----D--R-K--            | F-----T----- | -----                |
|                                           | <i>Chlorobium sp. 445</i>                    | PI048482   | ----FE---Q--IE--RK--R-   | EGKS--SK--RE | -Q--E--A-----        |
|                                           | <i>Cand. Thermochlorobacteria aerophilum</i> | KER10064   | ----F----Q--IT--K--K-    | DGK--SK-F-E  | GR--E--A-----        |
|                                           | <i>Chlorobaculum sp. 24CR</i>                | 129052373  | -----E-----R--           | -----P-----  | -----                |
|                                           | <i>Prosthecochloris sp. HL-130-GSB</i>       | 085660123  | -----E-----R--           | -----P-----  | -----                |
|                                           | <i>Prosthecochloris sp. GSB1</i>             | 094083210  | -----E-----K--           | -----P-----  | -----                |
| Larger<br><i>Ignavibacteriae</i><br>Clade | <i>Chlorobi bacterium OLB6</i>               | KXXK33417  | ---RV---GD--IT-AQ---R-   | GFE          | GGL--ER-V-A-----     |
|                                           | <i>Chlorobi bacterium OLB5</i>               | KXXK55587  | ---VE---DV-E-ID-AKK--Y-  | DE-E         | KQK--E--T-A-----     |
|                                           | <i>Chlorobi bacterium OLB7</i>               | KXXK54381  | ---VE---PDM-IE-AKR--R-   | GAE          | GE--E-Q-V-A-----     |
|                                           | <i>Chlorobi bacterium NICIL-2</i>            | KXB98252   | ---IE---SP-E-IE-ARK-RQ-  | GPE          | GEA--E--V-A-----     |
|                                           | <i>Melioribacter roseus</i>                  | 397689183  | ---VE---P---IE-AIK--K-   |              | DQK--E--V-A-----     |
|                                           | <i>Ignavibacterium album</i>                 | 385811725  | ---V---PQ--ID-AIR--K-    |              | DEK-KE---A-----      |
|                                           | <i>Gillisia marina</i>                       | 497916484  | ---V---I---E--E-AQK--A-  |              | DD--E--T-A-----      |
|                                           | <i>Nafusella turpanensis</i>                 | 516339844  | ---V---PDE--E-AKR--R-    |              | DQM--E--T-A-----     |
|                                           | <i>Psychroflexus tropicus</i>                | 517868227  | ---V---I---E--E-AQR--A-  |              | DDK--E--T-A-----S-   |
|                                           | <i>Gramella forsetii</i>                     | 120434745  | ---V---I--DE--E-AQR--A-  |              | DD--E--T-A-----      |
|                                           | <i>Fulvivirga imtechensis</i>                | 497263748  | ---V---PDE--E-AQR--      |              | DQL--E--T-A-----     |
|                                           | <i>Zhouia amylolytica</i>                    | 568803407  | ---V---I---E--E-AQR--A-  |              | DQ--E--T-A-----      |
|                                           | <i>Polaribacter porphyrae</i>                | 105016810  | -VS-I--I--DE--E-AVK---   |              | SQ-----V-A-----      |
|                                           | <i>Sediminibacterium ginsengisoli</i>        | 217698805  | ---V---ISP-E--Q-S-R-R-   |              | CQ-S--R--S-----      |
|                                           | <i>Tenuifilum thalassicum</i>                | 173075478  | ---V---E---T-ARK---      |              | DQE--E--V-A-----     |
|                                           | <i>Saccharicrinis aurantiacus</i>            | 075601683  | ---VK-----E---AKR--D-    |              | DTV--R--NA-----      |
|                                           | <i>Labilibaculum manganireducens</i>         | 101308830  | ---V---IS--E--Q-ARE--K-  |              | N-K--R--C-----S-     |
|                                           | <i>Flavobacterium psychrophilum</i>          | 123910415  | ---V---I--DE--E-AQR--A-  |              | DQ--E--T-A-----      |
|                                           | <i>Myroides marinus</i>                      | 074744386  | ---V---I---E--E-AQR--A-  |              | DQ--E--T-A-----      |
|                                           | <i>Aureitalea marina</i>                     | 104811626  | ---V---I---E--E-AQR--A-  |              | DQ--E--T-A-----      |
|                                           | <i>Planktosalinus lacus</i>                  | 188440396  | ---V---I--DE--E-AQR--K-  |              | DQ--E--T-A-----      |
| Other Bacteria                            | <i>Tenacibaculum skagerrakense</i>           | 132792729  | D---I--I--DE--E-SQQ--K-  |              | NQ--E--VNA-----      |
|                                           | <i>Psychroflexus salis</i>                   | 188406779  | ---RV---I--DE--E-AQR--A- |              | DDL--E--T-A-----S-   |
|                                           | <i>Massilibacteroides vaginae</i>            | 085537662  | ---RE--I-V-E--E-AQ--R-   |              | DR--E--TRA-----      |
|                                           | <i>Parabacteroides distasonis</i>            | 121736482  | ---RE--I-V-E--E-AQ--R-   |              | DR--E--TRA-----      |
|                                           | <i>Salmonella enterica</i>                   | MBH0619490 | ---V---PDE--T-AQR-RD-    |              | DQK--E--T-A-----     |
|                                           | <i>Chryseolinea serpens</i>                  | SHG77818   | ---RV---I--DE---QR--A-   |              | DQA--E-MV-A-----     |
|                                           | <i>Pukyongia salina</i>                      | 105216487  | ---V---I--DE--E-AQR--A-  |              | DQ--E--T-A-----      |
|                                           | <i>Flavobacterium haoranii</i>               | 072781367  | ---V---I--DE--E-AQR--A-  |              | DQ--E--T-A-----      |
|                                           | <i>Marinirhabdus gelatinilytica</i>          | 115124369  | ---V---I--DE--E-AQK--A-  |              | DQ--E--T-A-----      |
|                                           | <i>Catalinimonas alkaloidigena</i>           | 089683757  | ---V---PDE--E-AKR--R-    |              | DQ--E--T-A-----      |
|                                           | <i>Ancylomarina salipaludis</i>              | 129253240  | ---V---V---E--A-ARQ--K-  |              | N-T--NR--A-----S-    |
|                                           | <i>Imtechella halotolerans</i>               | 008238527  | ---V---I--DE--E-AQR--A-  |              | DQ--E--T-A-----      |
|                                           | <i>Dokdonia pacifica</i>                     | 089373128  | ---V---I--DE--E-AQR--A-  |              | DQ--E--T-A-----      |
|                                           | <i>Ginsengibacter hankyongi</i>              | 150415004  | ---V---I-P-E---ALR--Q-   |              | DQQ---T-A-----       |
|                                           | <i>Pustulibacterium marinum</i>              | 093022816  | ---V---I--DE--E-AQR--A-  |              | DQ--E--T-A-----      |
|                                           | <i>Robertkochia marina</i>                   | 136335350  | ---V---I--DE--E-AQR--A-  |              | DQ--E--T-A-----      |
|                                           | <i>Tenacibaculum adriaticum</i>              | 148869371  | ---V---I--DE--E-AQR--A-  |              | DQ--E--T-A-----      |
|                                           | <i>Polaribacter porphyrae</i>                | 105017184  | ---V---I--DE--E-AQL--A-  |              | DQ--E--T-A-----      |
|                                           | <i>Tenacibaculum dicentrarchi</i>            | 101902490  | ---V---I--DE--E-AQR--A-  |              | DQ--E--T-A-----      |
|                                           | <i>Hymenobacter norwichensis</i>             | 551195676  | ---V---PDE--T-AQR---     |              | DQQ--E--T-A-----     |
|                                           | <i>Cesiribacter andamanensis</i>             | 496485220  | ---V---PDE--E-AKR-RQ-    |              | DQM--E--T-A-----     |
|                                           | <i>Porphyromonas macacae</i>                 | 517172454  | ---RE--I-V-E--E-AQ--R-   |              | DR--E--TRA-----      |
|                                           | <i>Rhodonellum psychrophilum</i>             | 518430040  | ---V---DE--V-AKR--R-     |              | DQL--E--T-A-----     |
|                                           | <i>Belliella baltica</i>                     | 390944276  | ---V---DE--V-AKR--R-     |              | DQL--E--T-A-----     |
|                                           | <i>Microscilla marina</i>                    | 488786349  | ---V---PDE--E-AKR--R-    |              | DQV--E--T-A-----     |
|                                           | <i>Echinicola vietnamensis</i>               | 431798761  | ---V---DE--V-AKR--R-     |              | DQL--E--T-A-----     |

Figure S5

Partial sequence alignment of the protein RNA polymerase sigma factor RpoD/SigA showing a 12 aa insertion (boxed) that is exclusive to all members belonging to the order *Chlorobiales*

|                              |                                              |            |                                                      |
|------------------------------|----------------------------------------------|------------|------------------------------------------------------|
|                              |                                              | 284        | 333                                                  |
| Order<br><i>Chlorobiales</i> | <i>Chlorobium limicola</i>                   | 189347814  | QGNLDPTVLYGTPEKIKSEAAKVLKQFGQ HTE SSGHVFNLGHGILPDVDP |
|                              | <i>Chlorobium phaeoclathratiforme</i>        | 194337695  | -----DR--A--S-I--S-- H-----M--                       |
|                              | <i>Chlorobium ferrooxidans</i>               | 493409671  | -----AL-----S-I--S-- H-----M--                       |
|                              | <i>Chlorobaculum parvum</i>                  | 193213554  | ---M-----I----- D C-----                             |
|                              | <i>Chlorobaculum tepidum</i>                 | 21674849   | ---M-----I----- ND H-----                            |
|                              | <i>Chlorobium phaeobacteroides</i>           | 119356021  | ---M-----D--R-----I----- A T-----                    |
|                              | <i>Chlorobium luteolum</i>                   | 78187834   | ---M-----A-----R----- A Q-----                       |
|                              | <i>Chlorobium phaeovibrioides</i>            | 145220438  | ---M-----A--G-I----- A N-----                        |
|                              | <i>Prosthecochloris aestuarii</i>            | 194333095  | ---M-----HD--A-----I----- A E-----                   |
|                              | <i>Chlorobium phaeobacteroides</i>           | 189499267  | ---M-----HD--RA--G-I-ER-- S C-----                   |
|                              | <i>Chlorobaculum thiosulfatophilum</i>       | 139456015  | ---M-----I----- ND H-----                            |
|                              | <i>Prosthecochloris ethylica</i>             | 175187185  | ---M--I---HDR--A-----I----- Q K-----                 |
|                              | <i>Chloroherpeton thalassium</i>             | 193214637  | -----AS--R-RE--G-I-AK-- K-----N-                     |
|                              | <i>Chlorobium chlorochromatii</i>            | 78188113   | -----Q-R--I--G-I--S-- NH H-----M--                   |
|                              | <i>Chlorobaculum limnaeum</i>                | 2501895585 | ---M-----I----- N-----                               |
|                              | <i>Candidatus Thermochlorobacter. GBCh1B</i> | KER09257   | -----I--AS--R-REH--FI--F-E D T-----IE-               |
|                              | <i>Candidatus Chlorobium masyuteum</i>       | 166807571  | -----QAL--A--SKI--S-- TH H-----M--                   |
|                              | <i>Prosthecochloris marina</i>               | 110022929  | ---M-----HD--RA---I-ERF-K D T-----                   |
|                              | <i>Chlorobium sp. 445</i>                    | PI048272   | -----I--APHDV-RK---I-QRF-E SD -----I--               |
|                              | <i>Chlorobium sp. KB01</i>                   | 076789795  | -----AL--A--SKI--SF-- TH H-----M--                   |
|                              | <i>Chlorobaculum sp. 24CR</i>                | 129052099  | ---M-----R----- ND H-----                            |
|                              | <i>Chlorobium sp. N1</i>                     | 131355033  | ---M-----A-----I----- A Q-----                       |
|                              | <i>Prosthecochloris sp. ZM_2</i>             | 114607870  | ---M--I---HDR--A-----I----- Q K-----                 |
|                              | <i>Prosthecochloris sp. GSB1</i>             | 094081779  | ---M--A---H-R-RA---I-Q--- K-----                     |
|                              | <i>Prosthecochloris sp. HL-130-GSB</i>       | 085658882  | ---M--M---HDR-RA---I-R--- -G N-----                  |
| Ignavibacteriae              | <i>Ignavibacterium album</i>                 | 385809123  | -----ANKNY--Q-VIS--QS--E G--I-----V--                |
|                              | <i>Melioribacter roseus</i>                  | 397689611  | -----AGKD--FE-TVRT--NSY-K GP-----I--                 |
|                              | <i>Microbulbifer variabilis</i>              | 521082728  | -----S---AS--R-RQ-VETI-QA--H G-----T-K---            |
|                              | <i>Flagellatimonas centrodinii</i>           | 228348101  | -----S---AS--R-RL-V-R--QD--N G-----T-G-N-            |
|                              | <i>Pseudomonas putida</i>                    | 167036113  | ---M-----AK--A-RQ-V-RI-ASY-- GT-----T-E---           |
|                              | <i>Arsukibacterium ikkense</i>               | 046558556  | ---M--S--L-S--R-RQ-VQSI-DSY-- G-----T-----           |
|                              | <i>Piscirickettsia salmonis</i>              | 017376242  | ---I--A-----AG-RH-V-R--GE--H G-----Y--IN-            |
|                              | <i>Marinobacter nanhaiticus</i>              | 490718280  | ---M--SM--AP--R-RQ-V-DI--SRY-E G---I-----T----       |
|                              | <i>Pseudomonas fuscovaginae</i>              | 516515253  | ---M-----AR--A-RA-V-RI-ASY-E G-----T-E---            |
|                              | <i>Marinobacter hydrocarbonoclasticus</i>    | 387813140  | ---M--AM--APKAR-RQ-V-DI--RY-S G-----T-----           |
|                              | <i>Azomonas macrocytogenes</i>               | 183165880  | ---M-----AN-QA-RA-VGRI--ERY-K G-----T-E---           |
|                              | <i>Teredinibacter waterburyi</i>             | 188150035  | ---M--S---AS-DR-RA-V-RI-SE--R GN-----T-E---          |
|                              | <i>Marinobacter aquaeolei</i>                | 120553768  | ---M--AM--APKAR-RQ-V-DI--RY-S G-----T-----           |
|                              | <i>Microbulbifer agarilyticus</i>            | 497818265  | ---M--SI-LAN--R-RE-V-SI-ASY-R G---I-----VT-K---      |
|                              | <i>Gilvimarinus chinensis</i>                | 519053976  | ---M--I--AS--R-RE-VGRI--SSY-S G---I-----T-E---       |
|                              | <i>Pseudomonas aeruginosa</i>                | 564955370  | ---M--S---AN-AA-RA-V-RI-AAY-E GT-----T-E---          |
|                              | <i>Thioflavicoccus mobilis</i>               | 431932858  | -----C---AS--Q-RA-V-R--ESY-R GH-----T-----           |
|                              | <i>Teredinibacter purpureus</i>              | 045857385  | ---M--I--AS-DR-RE-VGRI--SY-A G-----T-E---            |
|                              | <i>Hydrogenovibrio kuenenii</i>              | 024850106  | ---M--SI--AS--R-RQ-V-TI--EKY-K G-----H-E---          |
|                              | <i>Cellvibrio zantedeschiae</i>              | 189419012  | ---M--I--AS--R-RT-VGDI-QAY-K G-----T-E---            |
|                              | <i>Priestia aryabhatai</i>                   | QPN45859   | ---M-----AK--A-RN-V-RI-ASY-K GT-----T-E---           |
|                              | <i>Rheinheimera nanhaiensis</i>              | 008223154  | ---M--AI-L-S--R-RQ-VQMI--DG-- G-----T-----           |
|                              | <i>Idiomarina loihiensis</i>                 | 56461406   | ---M--S---AK-AR-EE-VQSI-QSY-S GT-----H-E---          |
|                              | <i>Pseudomonas syringae</i>                  | 330938623  | ---M-----AR--A-RQ-V-RI-ASY-S GT-----T-E---           |
|                              | <i>Thiococcus pfennigii</i>                  | MBK1702036 | -----C---AS--R-RA-V-R--ESY-R GH-----T-----           |
|                              | <i>Microbulbifer taiwanensis</i>             | 193190112  | -----A---AS--R-RA-V-A--ES--S G-----T-K---            |
|                              | <i>Alishewanella longhuensis</i>             | 189433774  | ---M--S--L---R-RQ-VQTI--DG-- GT--I-----T----         |
|                              | <i>Gilvimarinus chinensis</i>                | 020209851  | ---M--I--AS--R-RE-VGRI--SSY-S G---I-----T-E---       |
| Other Bacteria               |                                              |            |                                                      |
|                              |                                              |            |                                                      |
|                              |                                              |            |                                                      |
|                              |                                              |            |                                                      |
|                              |                                              |            |                                                      |
|                              |                                              |            |                                                      |
|                              |                                              |            |                                                      |
|                              |                                              |            |                                                      |
|                              |                                              |            |                                                      |
|                              |                                              |            |                                                      |
|                              |                                              |            |                                                      |
|                              |                                              |            |                                                      |
|                              |                                              |            |                                                      |
|                              |                                              |            |                                                      |
|                              |                                              |            |                                                      |
|                              |                                              |            |                                                      |
|                              |                                              |            |                                                      |
|                              |                                              |            |                                                      |
|                              |                                              |            |                                                      |
|                              |                                              |            |                                                      |
|                              |                                              |            |                                                      |
|                              |                                              |            |                                                      |
|                              |                                              |            |                                                      |
|                              |                                              |            |                                                      |
|                              |                                              |            |                                                      |
|                              |                                              |            |                                                      |
|                              |                                              |            |                                                      |

Figure S6

Partial sequence alignment of the protein uroporphyrinogen decarboxylase, showing a 3 aa insertion (boxed) that is exclusive to all members belonging to the order *Chlorobiales*

|                              |                                            | 211       | 250                                        |
|------------------------------|--------------------------------------------|-----------|--------------------------------------------|
| Order<br><i>Chlorobiales</i> | <i>Chlorobium phaeoclathratiforme</i>      | 194336061 | ITNRTLSKAETLAEELGNTKV L PFETFREHLHEFDIIITA |
|                              | <i>Prosthecochloris vibrioformis</i>       | 139626275 | -----I-----Q-----D-----                    |
|                              | <i>Chlorobium chlorochromatii</i>          | 78189476  | -----I-----A-----Q-----Y-SYK-----          |
|                              | <i>Chlorobium limicola</i>                 | 189346423 | -----A-----G-----SYK-Y-----                |
|                              | <i>Chlorobium luteolum</i>                 | 78187285  | -----Q-----A-----R-----SYK-----            |
|                              | <i>Chlorobium phaeobacteroides</i>         | 189499890 | -----A-----Q-----Y-SYKD-----               |
|                              | <i>Chlorobaculum tepidum</i>               | 21674247  | -----Q-----A-----R-----Y-SYK-----          |
|                              | <i>Chlorobaculum parvum</i>                | 193212402 | -----Q-----A-----R-----Y-SYK-----          |
|                              | <i>Chlorobium ferrooxidans</i>             | 493411236 | -----A-----A-S-----Y-SYK-----              |
|                              | <i>Prosthecochloris aestuarii</i>          | 194334345 | -----M-----A-----Q-----DN-----             |
|                              | <i>Chlorobium phaeovibrioides</i>          | 145220049 | -----R-S-A-----Q-----Y-SYK-----            |
|                              | <i>Chlorobium phaeobacteroides</i>         | 119357592 | -----A-----K-----SYKDY-----                |
|                              | <i>Chloroherpeton thalassium</i>           | 193215988 | -----YE-----L-Q-----G-I-L-EMT-R-----VV--   |
|                              | <i>Chlorobaculum limnaeum</i>              | 501894998 | -----A-----R-----Y-SYK-----                |
|                              | <i>Prosthecochloris vibrioformis</i>       | 139626275 | -----Q-----D-----                          |
|                              | <i>Chlorobaculum parvum</i>                | 012501988 | -----Q-----A-----R-----Y-SYK-----          |
|                              | <i>Chlorobaculum thiosulfatophilum</i>     | 139457331 | -----Q-----A-----R-----Y-SYK-----          |
|                              | <i>Chlorobium limicola</i>                 | 012465852 | -----A-----G-----SYK-Y-----                |
|                              | <i>Prosthecochloris marina</i>             | 110023205 | -----A-----Q-----Y-SYK-----                |
|                              | <i>Candidatus Chlorobium masyuteum</i>     | 166808915 | -----A-----A-S-----Y-SYKD-----             |
|                              | <i>Cand. Thermochlorobacter aerophilum</i> | RFM23265  | -----PEH-A-RKI-SNI I T-DY--R-----V-S-      |
|                              | <i>Chlorobium</i> sp. N1                   | 131353836 | -----Q-----A-----R-----SYK-----            |
|                              | <i>Chlorobium</i> sp. KB01                 | 076790786 | -----A-----A-S-----Y-SYK-----              |
|                              | <i>Chlorobaculum</i> sp. 24CR              | 129052243 | -----Q-----A-----R-----Y-YK-----           |
|                              | <i>Prosthecochloris</i> sp. CIB 2401       | 068866687 | -----I-----Q-----D-----                    |
|                              | <i>Prosthecochloris</i> sp. HL-130-GSB     | 085659333 | -----M-----A-----Q-----I-----D-----        |
|                              | <i>Prosthecochloris</i> sp. GSB1           | 094082178 | -----A-----A-----Q-----SYK-----            |
| Ignavibacteriae              | <i>Ignavibacterium album</i>               | 385809127 | L---FE---K-T--N-AVF -D-K---K---S-          |
|                              | <i>Melioribacter roseus</i>                | 397689614 | -A---MER-K---KVNGGVI -PSLK---NY---S-       |
|                              | <i>Denitrovibrio acetiphilus</i>           | 291288797 | V---M---K-C-V-GDTL ---SY--S-EKY--V-SS      |
|                              | <i>Deferribacter desulfuricans</i>         | 291279208 | V---F-R-I---INGEAI ---DN-YNK-N-V--V-SS     |
|                              | <i>Flexistipes sinusarabici</i>            | 336323776 | V---Y-R-K-Q-INGIP- D-R-T-Y-KKT--V-SS       |
|                              | <i>Calditerrivibrio nitroreducens</i>      | 313673929 | V---FER-LQ-K-VNGEA- -I-K-V-Y-K-V--V-SS     |
|                              | <i>Mucispirillum schaedleri</i>            | 555554431 | V---FE--LK---FSGDA- T-DR-AQK-P-I---SS      |
|                              | <i>Thermodesulfovibrio yellowstonii</i>    | 206890822 | L---FQR-EI-K-FNGVA- --GNLK-Q-VKT--V-CS     |
|                              | <i>Geobacter lovleyi</i>                   | 189423574 | V---FER-QR---F-GEAI -DELFL---KA-VL-S       |
|                              | <i>Geopsychrobacter electrodiphilus</i>    | 522166020 | V---FAR-K-T-FKGRA- A-N-QDQ-QA-VLSS         |
| Other Bacteria               | <i>Desulfuromonas acetoxidans</i>          | 492848965 | V---FAR-K-S-FSGQAI L--N-HD--QQV--LLSS      |
|                              | <i>Desulfovibrio desulfuricans</i>         | 518845794 | VA---FARGQA---QFNGEAI --DQLF-Q-EKV---SS    |
|                              | <i>Geobacter uraniireducens</i>            | 148262443 | V---FER-VK---FDGKA- NY-ELFD---KA-VLSS      |
|                              | <i>Pelobacter propionicus</i>              | 118581777 | VA---FA-G-R-A-F-GEAI ---ELFQE--RA-VLSS     |
|                              | <i>Geobacter metallireducens</i>           | 404498082 | V---YER-VK---FEGKP- S-DDLFDQ--KA-VLSS      |
|                              | <i>Bilophila wadsworthia</i>               | 491168655 | VA---YQR-KE-A-FKGEA- ---HLF---ADV---SS     |
|                              | <i>Geobacter bemidjensis</i>               | 197116805 | V---YER-K---FDAKP- H--ALM-T-PKA--LSS       |
|                              | <i>Desulfovibrio gigas</i>                 | 545642716 | VA---ER-VH---QFRGEA- ---LLH-R---V---SS     |
|                              | <i>Geobacter daltonii</i>                  | 222054399 | V---FER-VK---FDGKA- NY-DLFDQ--KA--LSS      |
|                              | <i>Methanocaldococcus jannaschii</i>       | 15668315  | VA---YE---K-K---GMAI K-DKLE-A-RYA--V-S-    |
|                              | <i>Methanotorris formicicus</i>            | 494103966 | -A---YER-C-R-RGIAI H-DKL--A-KYA--V-S-      |
|                              | <i>Algoriphagus aestuariicola</i>          | 206567720 | -----Q---QI-A---FEV- ---NC-AMN-A-V-VCS     |
|                              | <i>Xanthovirga aplysinae</i>               | 155206362 | -----F---S-A-C-LKTI ---QTF-VMKD--V--SS     |
|                              | <i>Pontibacter roseus</i>                  | 018476482 | -----T-QH---C-LEVL ---DMVQG-K-A-VV-SS      |
|                              | <i>Botryobacter ruber</i>                  | 114777573 | -----A-VP---C-MEVL ---DIVQG-K-A-VV-SS      |
|                              | <i>Desulfuromonas soudanensis</i>          | 053551860 | V---ER-VK---FNDRAL ---D-TH--QQV--L-S       |
|                              | <i>Taibaiella koreensis</i>                | 118973184 | LI---EG-QA-----LHTA ---ML-QYIR-C---V-      |
|                              | <i>Aeromonas diversa</i>                   | 005351703 | VA---QR-QG---F-AQVM TL-AIP-----A-V-SS      |
|                              | <i>Methanothermococcus okinawensis</i>     | 336121948 | VA---YER-R-N-KGMA- H-DKLN-A-NFS---C-       |
|                              | <i>Methanococcus voltae</i>                | 297619964 | -S---YER-R-K-KGIAI N-DKLN-AINYS---C-       |
|                              | <i>Nitritalea halalkaliphila</i>           | 496347363 | -A---FE-QA-AG--YSVI --DEVN-AMAAA-VVVSS     |
|                              | <i>Mariniradius saccharolyticus</i>        | 495899215 | -----FE--KE--D---FEVI ---RCV-AMKDA-VVVSS   |
|                              | <i>Microscilla marina</i>                  | 488784857 | -C---A---K-A-C-AKVI ---NV-QAIL-A--V-SS     |
|                              | <i>Chryseobacterium taeanense</i>          | 515974948 | -A---ERG-K-AQF-AGTM RLADLP-----Y-AV-S      |
|                              | <i>Nitrospina gracilis</i>                 | 491151936 | VAS--YER-AG-KT-NGSAL G-DE-K-E-YRA--VVSS    |
|                              | <i>Magnetococcus marinus</i>               | 117926918 | V---F-R-VD--QQFDGHAF -I-ALA-N--RA--V-SS    |
|                              | <i>Photobacterium damselae</i>             | 491440282 | VA---RER-KFST-F-AEVI GL-QIP---RA--V-SS     |
|                              | <i>Aeromonas diversa</i>                   | 491493979 | VA---QR-QG---F-AQVM TL-AIP-----A-V-SS      |
|                              | <i>Photobacterium leiognathi</i>           | 496274273 | VA---RER-GI-R-F-AEVI SL-EIP---RA--V-SS     |
|                              | <i>Alteromonas macleodii</i>               | 406596336 | VA---VAR-A--T-DASVF TLSQVP---KD--V-SS      |
|                              | <i>Acidovorax ebreus</i>                   | 222109996 | -A---ERG-K-TRF-GEVM RLADLPD-----AV-S       |

Figure S7

Partial sequence alignment of the protein glutamyl-tRNA reductase, showing a 1 aa insertion (boxed) that is exclusive to all members belonging to the order *Chlorobiales*

|                              |                                              |            |                          |   |                             |
|------------------------------|----------------------------------------------|------------|--------------------------|---|-----------------------------|
| Order<br><i>Chlorobiales</i> | <i>Chlorobaculum tepidum</i>                 | 21674908   | GSWGPFILGSMHPRVTAAIEYTLR | N | IGTSFGTPIELEIEIAELLCKIVPS   |
|                              | <i>Prosthecochloris vibrioformis</i>         | 139626633  | -----I---L-H--T          | K | -----M-----TQ----           |
|                              | <i>Chlorobium ferrooxidans</i>               | 493409722  | -----I---L---K           | - | -----M-----TQ----           |
|                              | <i>Chlorobium phaeoclathratiforme</i>        | 194337772  | -----I---L---K           | - | -----M-----TQ----           |
|                              | <i>Chlorobium chlorochromatii</i>            | 78189921   | -----I---L---K           | - | -----M-----Q----            |
|                              | <i>Chlorobium phaeobacteroides</i>           | 119358325  | -----I---L---K           | - | -----M-----TQ----           |
|                              | <i>Chlorobium limicola</i>                   | 189347866  | -----Q-----              | - | -S-----M-----SR----         |
|                              | <i>Prosthecochloris aestuarii</i>            | 194333039  | -----I---L-H--T          | K | -----M-----Q----            |
|                              | <i>Chlorobium luteolum</i>                   | 78187880   | -----I---L-H--T          | K | -----M-----T-----           |
|                              | <i>Chlorobium phaeobacteroides</i>           | 189499186  | -----I---N--T            | K | -----M-----TQ----           |
|                              | <i>Chlorobium phaeovibrioides</i>            | 145220484  | -----I---L-R--T          | T | -----M-----VE----           |
|                              | <i>Chlorobaculum parvum</i>                  | 193211823  | -----L-----              | - | -----I-----Q----            |
|                              | <i>Chloroherpeton thalassium</i>             | 193213745  | -----HS---IE---R-MK      | A | H-----A-T-----L--II-V----   |
|                              | <i>Chlorobaculum limnaeum</i>                | 2501894144 | -----L-----              | - | -----V-----                 |
|                              | <i>Chlorobaculum thiosulfatiphilum</i>       | 139457606  | -----L-----              | - | -----V-----                 |
|                              | <i>Pelodictyon phaeoclathratiforme</i>       | 012509417  | -----I---L---K           | - | -----M-----                 |
|                              | <i>Prosthecochloris marina</i>               | 110022620  | -----K---L-H--T          | K | V-----T-----                |
|                              | <i>Cand. Thermochlorobacter aerophilum</i>   | RFM25453   | -----HS---V---H-K        | H | -----A-----L--ISRL----      |
|                              | <i>Candidatus Chlorobium masyuteum</i>       | 166807515  | -----I---L---K           | - | -----M-----                 |
|                              | <i>Chlorobium</i> sp. 445                    | PI047274   | -----HA---V---H-K        | H | V-----A-T---QL---ISTL----   |
|                              | <i>Chlorobium</i> sp. N1                     | 131355189  | -----I---L-F--T          | K | -----TR-----                |
|                              | <i>Prosthecochloris</i> sp. GSB1             | 094081727  | -----I---L-H--T          | K | -----M-----Q----            |
|                              | <i>Prosthecochloris</i> sp. ZM               | 114617802  | -----I---L-H--T          | K | -----M-----Q----            |
|                              | <i>Prosthecochloris</i> sp. CIB 2401         | 068868140  | -----I---L-H--T          | K | -----M-----TQ----           |
|                              | <i>Prosthecochloris</i> sp. HL-130-GSB       | 085658843  | -----K---L-H--T          | K | -----M-----Q--TQ----        |
|                              | <i>Chlorobaculum</i> sp. 24CR                | 129052311  | -----L-----              | - | -----Q----                  |
| Ignavibacteriae              | <i>Melioribacter roseus</i>                  | 385811690  | ----HLF-HNP-FIKE-LKA-E   | E | D----A-T-I-VKM---I-DL----   |
|                              | <i>Ignavibacterium album</i>                 | 397690482  | ----HLF-HNP-FIKK-LAEAFE  | K | K----A-T---VRM-Q-ITEL----   |
|                              | <i>Thermanaeromonas toyohensis</i>           | 084665710  | ----L--HR--E-V--L-K-K    | E | M----A-T---N-L-KMITQA----   |
|                              | <i>Pelotomaculum thermopropionicum</i>       | 147677314  | C---L--HR---VG-L-RC-N    | E | V----A-T---NIL--MIVEA----   |
|                              | <i>Pelotomaculum propionicum</i>             | 134213985  | ----L--HR--HAVE-LERC--   | D | V----A-T-M-TKL-SMVAE----    |
|                              | <i>Burkholderia phytofirmans</i>             | 187925072  | ----M--HV--E-LE-VQRV-G   | G | N-F---A-T-S-V---EI--L----   |
|                              | <i>Clostridium straminisolvens</i>           | 575087331  | ----M--HS---LE--SK-MV    | M | D-L---AAT---VQM---ILEL----  |
|                              | <i>Brevibacillus panacihumi</i>              | 559035961  | ----L--HA--Q-L--TEVAA    | A | L----A-T-R-T-M-K-V-QL----   |
|                              | <i>Bacillus cereus</i>                       | 507065470  | ----L--HA--E-VK--QEAAS   | S | Q-----L-T-A-TKM---I-RSI---- |
|                              | <i>Histophilus somni</i>                     | 136121970  | ----M--HN--SILS-VLK-AE   | E | N-L----TP---L---I-QL----    |
|                              | <i>Chloracidobacterium validum</i>           | 211427812  | ----M--HA--E-L---RSVIE   | E | R----A-T---V---IVS----      |
|                              | <i>Andreprevotia chitinilytica</i>           | 035054799  | ----L--HA--A-ID-V-RAA-   | A | N-L---A-T-A-DL-D---ELL----  |
|                              | <i>Chitinolyticbacter meiyuanensis</i>       | 148713814  | ----L--HA--A-IE-V-R-I-   | I | N-L---A-TAA---L-D---QQL---- |
|                              | <i>Nitrosovibrio tenuis</i>                  | 090829456  | ----L--HA--E-IE-V-AAAQ   | Q | N-LT---A-T-A-L-----L-S----  |
|                              | <i>Formivibrio citricus</i>                  | 091194206  | ----L--HA--A-VE-V-RAA-   | A | N-L---A-T-A-DL-D---ELL----  |
|                              | <i>Gallibacterium salpingitidis</i>          | 066111049  | ----MV--HN--TILQ-VID-AK  | K | N-L---A-T---KL---V-L----    |
|                              | <i>Azonexus hydrophilus</i>                  | 028993650  | ----M--HA--Q-I--VQEAUV   | V | D-L---A-T-R-V---D---EM----  |
|                              | <i>Brevibacillus antibioticus</i>            | 137029901  | ----L--HA---L---TEVAA    | A | L----A-T-R-T-M-K-V-E----    |
|                              | <i>Nitrosospora multififormis</i>            | 041352651  | ----L--HA--E-VD-VYAAAK   | K | N-LT---A-T-A-L-----RL----   |
|                              | <i>Chloracidobacterium aggregatum</i>        | 211426713  | ----M--HA--E-L---RSVIE   | E | R----A-T---V---IVSL----     |
|                              | <i>Caballeronia terrestris</i>               | 087655126  | ----M--HV--E-LD-VQRV-G   | G | N-F---A-T-A-----EI--L----   |
|                              | <i>Brevibacillus laterosporus</i>            | 517502562  | ----L--HA--K-LQ--SE-AL   | L | L----A-T-R-TTM-K-V-D----    |
|                              | <i>Pasteurella multocida</i>                 | 378774174  | ----M--HN--TILD-VIS-AQ   | Q | N-L---A-T-A---L---V-SL----  |
|                              | <i>Paenibacillus ginsengihumi</i>            | 518363260  | ----L-V-HA---VE-VQRAAE   | E | A----A-T---T-M-K-VAER----   |
|                              | <i>Cohnella laeviribosi</i>                  | 517834161  | L---L-A-HA--E-VE--KR-AE  | E | K----A-T---T-M---V-ER----   |
|                              | <i>Gallibacterium anatis</i>                 | 545092524  | ----MV--HN--SILN-VIE-AK  | K | N-L---A-T---L---V-RL----    |
|                              | <i>Haemophilus somnus</i>                    | 113461372  | ----M--HN--SILS-VLK-AE   | E | N-L---TP---L---I-QL----     |
|                              | <i>Gallibacterium anatis</i>                 | 517158368  | ----MV--HN--SILN-VIE-AK  | K | N-L---A-T---L---V-RL----    |
| Other Bacteria               | <i>Paraburkholderia silvatlantica</i>        | 133790131  | ----M-V-HV--E-LD-VQRV-A  | A | N-F---A-T-A-----EI-----     |
|                              | <i>Aggregatibacter segnis</i>                | 493770001  | ----M--HN--TILN-VMK-AK   | K | N-L---A-TP---L---V-ELI----  |
|                              | <i>Avibacterium paragallinarum</i>           | 516416719  | ----M--HN--AILS-VQK-AE   | E | K-L---A-TP---DL---V-QL----  |
|                              | <i>Pasteurella multocida</i>                 | 512748104  | ----M--HN--TILD-VIS-AQ   | Q | N-L---A-TA---L---V-SL----   |
|                              | <i>Aggregatibacter actinomycetemcomitans</i> | 491728551  | ----M--HN--SILN-VIK-AQ   | Q | N-L---A-TP---L---V-SL----   |
|                              | <i>Avibacterium paragallinarum</i>           | 545595327  | ----M--HN--AILS-VQK-AE   | E | K-L---A-TP---DL---V-QL----  |
|                              | <i>Planctomyces brasiliensis</i>             | 325111308  | ----H--HQ---L---QEE-S    | S | K----A-TA---TDM---V-EC----  |
|                              | <i>Paenibacillus vortex</i>                  | 493234377  | ----L-M-HA--E-VD-LQE-AA  | A | K----A-TL---T-M-K-V-ER----  |
|                              | <i>Planctomyces limnophilus</i>              | 296122991  | ----H--HR--V---HAAVD     | D | R----A-C-A-N-L-QMVEA----    |
|                              | <i>Desulfotomaculum kuznetsovii</i>          | 333978951  | ----L--HR--E---LQEC-E    | E | -----A-T---L-RAIVEAL-A      |
|                              | <i>Clostridium thermocellum</i>              | 125975015  | ----M--HS---LE--VSK-MV   | V | D-L---AAT---VQM---ITEL----  |
|                              | <i>Geobacter uraniireducens</i>              | 148266255  | ----M--HC--Q-V--VKSADV   | V | N-C---A-T---TL---MVIEA----  |
|                              | <i>Burkholderia kururiensis</i>              | 516384471  | ----M-V-HV--E-LE-VQRV-V  | V | K-F---A-T-A-----VI--L----   |
|                              | <i>Haemophilus somnus</i>                    | 170719024  | ----M--HN--SILS-VLKIAE   | E | N-L---TP---L---I-QL----     |
|                              | <i>Burkholderia xenovorans</i>               | 91784895   | ----M--HV--E-LE-VQRV-G   | G | N-F---A-T-S-V---EI--L----   |
|                              | <i>Nitrosomonas europaea</i>                 | 30249394   | ----L--HA--D-VR-VQIAAG   | G | H----A-TAA-L-----RLL----    |

Figure S8

Partial sequence alignment of the protein glutamate-1-semialdehyde 2,1-aminomutase showing a 1 aa insertion (boxed) that is found in all members belonging to the order *Chlorobiales*. The CSI is not present in any other bacterial species apart from the three exceptions shown above, in the top 500-BLASTp hits.

|                              |                                              | 233        |                      | 282                                    |
|------------------------------|----------------------------------------------|------------|----------------------|----------------------------------------|
| Order<br><i>Chlorobiales</i> | <i>Chlorobium phaeobacteroides</i>           | 189500266  | DSLAISIGTSHGAFKFKPGE | DPKIRLDILEEIEKRIPIVHGSSVP              |
|                              | <i>Chlorobium chlorochromatii</i>            | 78186883   | -----A-----          | -----A-----                            |
|                              | <i>Chlorobium phaeovibrioides</i>            | 145219699  | -----Q-----          | -----Q-----                            |
|                              | <i>Chlorobium chlorochromatii</i>            | 78188704   | -----A-----          | -----A-----                            |
|                              | <i>Chlorobium ferrooxidans</i>               | 493411307  | -----S--R-----       | -----S--R-----                         |
|                              | <i>Chlorobium phaeobacteroides</i>           | 119357140  | -----T--R-----       | -----T--R-----                         |
|                              | <i>Chlorobium limicola</i>                   | 189346770  | -----S--Q-----A--    | -----S--Q-----A--                      |
|                              | <i>Chlorobium phaeoclathratiforme</i>        | 194336449  | -----T--H-----       | -----T--H-----                         |
|                              | <i>Prosthecochloris aestuarii</i>            | 194333871  | ---A-----S-----      | ---A-----S-----                        |
|                              | <i>Chlorobaculum parvum</i>                  | 193212638  | ---A-----A-----A--   | ---A-----A-----A--                     |
|                              | <i>Prosthecochloris marina</i>               | 110021934  | ---A-----Y-----      | ---A-----Y-----                        |
|                              | <i>Chlorobaculum tepidum</i>                 | 21673879   | ---A-----A-----A--   | ---A-----A-----A--                     |
|                              | <i>Chlorobaculum limnaeum</i>                | 2501894580 | ---A-----A-----A--   | EHS-----A-----A--                      |
|                              | <i>Pelodictyon luteolum</i>                  | 011357757  | -----A-----A-----    | -----A-----A-----                      |
|                              | <i>Prosthecochloris ethylica</i>             | 175187116  | ---A-----Y-----      | -----A--Q-----                         |
|                              | <i>Chlorobaculum thiosulfatiphilum</i>       | 139457515  | ---A-----A-----A--   | EHS-----A-----A--                      |
|                              | <i>Prosthecochloris sp. GSB1</i>             | 094082604  | -----Q-----          | -----Q-----                            |
|                              | <i>Prosthecochloris sp. HL-130-GSB</i>       | 085659640  | ---A-----A-----      | -----A-----                            |
|                              | <i>Chlorobium sp. N1</i>                     | 131353286  | -----A-----A-----    | -----A-----A-----                      |
|                              | <i>Prosthecochloris sp. ZM_2</i>             | 114606996  | ---A-----Y-----      | ---A-----Q-----                        |
|                              | <i>Chlorobaculum sp. 24CR</i>                | 129051447  | ---A-----A-----      | EHL-----R-----A--                      |
| Ignavibacteriae              | <i>Melioribacter roseus</i>                  | 397689677  | -----N---EQ          | CTRN EDGILI P-PL-F-----A--             |
|                              | <i>Bacteroides pyogenes</i>                  | 545405147  | -----Y--T-EQ         | CHVDPATGRMV P-PLAF-V-DAVM-EL-----      |
|                              | <i>Barnesiella viscericola</i>               | 570742111  | -----Y---EQ          | CHVDPATGRVL P-PLAF-V-DAVMEKL-----      |
|                              | <i>Bacteroides salanitronis</i>              | 325299001  | -----Y---EQ          | CHVDPKTGRVL P-PLAF-V-DAVMEKL-----      |
|                              | <i>Barnesiella intestinihominis</i>          | 496138225  | -----Y---EQ          | CHVDPKTGRVL P-PLAF-V-DAVMEKL-----      |
|                              | <i>Parabacteroides distasonis</i>            | 150008558  | -----Y--T-EQ         | CTIDPVTGKMV P-PLAF-V-DAVMEKL-----      |
|                              | <i>Bacteroides plebeius</i>                  | 494838222  | -----Y---EQ          | CHVDPATGRVL P-PLAF-V-DAVMEKL-----      |
|                              | <i>Parabacteroides johnsonii</i>             | 495425753  | -----Y--T-EQ         | CTIDPVTGKMV P-PLAF-V-DAVMEKL-----      |
|                              | <i>Bacteroides fragilis</i>                  | 492247874  | -----Y--TQEQ         | CHIDPKTGRMV P-PLAF-V-DGVM-EL-----      |
|                              | <i>Prevotella saccharolytica</i>             | 496453479  | -----Y--T-DQ         | CTRDPKTGRVL P-PLAF-V-DA-MEKL-----      |
|                              | <i>Prevotella paludivivens</i>               | 517276035  | -----Y---EQ          | CTRDPKTGKLV P-PLAF-V-DAVMEKL-----      |
|                              | <i>Fibrobacter succinogenes</i>              | 261417271  | -----Y---EQ          | CTRN AQGKLV P-PLAF-V-HA--QKL-----      |
|                              | <i>Treponema brennaborensis</i>              | 332297587  | -----RQ---EQ         | CTRT ADGVLV P-PLAF-V-A--KL-----        |
|                              | <i>Megamonas hypermegale</i>                 | 479206841  | ---A-----Y--T-DQ     | CTRN EQGILV P-PL-F-----VA--L-N-----A-- |
|                              | <i>Barnesiella intestinihominis</i>          | HAC12973   | -----Y---EQ          | CHVDPKTGRVL P-PLAF-V-DAVMEKL-----      |
|                              | <i>Phocaeicola coprophilus</i>               | 204440964  | -----Y---EQ          | CHVDPATGRVL P-PLAF-V-DGVM-EL-----      |
|                              | <i>Prevotella conceptionensis</i>            | 044259939  | -----Y--T-EQ         | CTRDPKTGRVL P-PLAF-V-DA-MEKL-----      |
|                              | <i>Pseudoprevotella muciniphila</i>          | 111897780  | -----Y---EQ          | CTRDPKTGKLV P-PLAF-V-DA-MEKL-----      |
|                              | <i>Parabacteroides distason</i>              | 195473517  | -----Y--T-EQ         | CTIDPVTGKMV P-PLAF-V-DAVMEKL-----      |
|                              | <i>Bacteroides faecichinchi</i>              | 073349791  | -----Y--T-EQ         | CHIDPVTGVMV P-PLAF-V-DAVMEKL-----      |
|                              | <i>Cand. Avibacter. excrementipullorum</i>   | HIS09802   | -----Y---EQ          | CTVDPKTGRVL P-PLAF-V-DGVM-EL-----      |
|                              | <i>Coprobacter secundus</i>                  | 021930517  | -----Y---EQ          | CTVDPKTGRVL P-PLAF-V-DGVM-EL-----      |
|                              | <i>Parabacteroides johnsonii</i>             | EEC95866   | -----Y--T-EQ         | CTIDPVTGKMV P-PLAF-V-DAVMEKL-----      |
|                              | <i>Marseilla massiliensis</i>                | 205111000  | -----Y---EQ          | CTRDPKTGRVL P-PLAF-V-D--MQKL-----      |
|                              | <i>Cand. Prevotella stercoripullorum</i>     | HIW44521   | -----Y---EQ          | CTRDPKTGRVL P-PLAF-V-D--MQKL-----      |
|                              | <i>Cand. Cryptobacter. intestinipullorum</i> | HIS23577   | -----Y---EQ          | CTLDPKTGRVL P-PLAF-V-DGVM-EL-----      |
| Other Bacteria               | <i>Prevotella buccae</i>                     | 048798599  | -----Y--T-EQ         | CTRDPKTGRVL P-PLAF-V-DA-MVQL-----      |
|                              | <i>Brachyspira aalborgi</i>                  | 147526563  | -----Y---Q           | N-----K---K-----                       |
|                              | <i>Streptobacillus notomys</i>               | 172793479  | -----H---D           | -----K---E-----                        |
|                              | <i>Fusobacterium necrogenes</i>              | 115269440  | -----H---D           | ---L-----R-----A--                     |
|                              | <i>Sebalidella termitidis</i>                | 012861482  | -----H---D           | N-----                                 |
|                              | <i>Caproicibacterium amylolyticum</i>        | 212507242  | -----Y---Q           | ---L-----VS-L-----ASSVP                |

Figure S9

Partial sequence alignment of the protein class II fructose-1,6-bisphosphate aldolase showing a 11 aa deletion (boxed) that is found in all members belonging to the order *Chlorobiales*

|                                           |                                          | 325       | 365                     |
|-------------------------------------------|------------------------------------------|-----------|-------------------------|
| Order<br><i>Chlorobiales</i>              | <i>Chlorobaculum parvum</i>              | 193212482 | SRSLMARLTPKEHRTFFGFYD   |
|                                           | <i>Chlorobium phaeovibrioides</i>        | 145219537 | ---M---PS-V-----        |
|                                           | <i>Chlorobium tepidum</i>                | 21674159  | ---M---V-----           |
|                                           | <i>Chlorobium ferrooxidans</i>           | 493410723 | ---M---A-V-----         |
|                                           | <i>Pelodictyon phaeoclathratiforme</i>   | 194336684 | ---M-T---Q-V-----       |
|                                           | <i>Prosthecochloris aestuarii</i>        | 194334279 | ---M---V-----           |
|                                           | <i>Chlorobium limicola</i>               | 189347022 | ---M-K---R-VA-----      |
|                                           | <i>Chlorobium phaeobacteroides</i>       | 119357455 | ---M---Q-V-----         |
|                                           | <i>Chloroherpeton thalassium</i>         | 193213931 | ---M---A-SA-----        |
|                                           | <i>Chlorobium chlorochromatii</i>        | 78188904  | ---M-T---Q-V-----       |
|                                           | <i>Chlorobium luteolum</i>               | 78187183  | ---M---RA-LA-----       |
|                                           | <i>Prosthecochloris marina</i>           | PWW81998  | ---M---PK-V-----        |
|                                           | <i>Prosthecochloris ethylica</i>         | 194185816 | --AM---PK-V-----        |
|                                           | <i>Chlorobaculum thiosulfatophilum</i>   | 139457788 | -----V-----             |
|                                           | <i>Prosthecochloris vibrioformis</i>     | TNJ37359  | ---M---K-V-----         |
|                                           | <i>Candidatus Chlorobium masyuteu</i>    | 208019732 | ---M---A-V-----         |
|                                           | <i>Chlorobium</i> sp. N1                 | 131353654 | ---M---RA-LA-----       |
|                                           | <i>Chlorobium</i> sp. KB01               | 076790259 | ---M---A-V-----         |
|                                           | <i>Chlorobaculum</i> sp. 24CR            | 129051526 | ---L---V-----           |
|                                           | <i>Prosthecochloris</i> sp. HL-130-GSB   | ARM31897  | ---M-K---V-----         |
|                                           | <i>Prosthecochloris</i> sp. ZM           | 114617037 | ---M---V-----           |
|                                           | <i>Prosthecochloris</i> sp. CIB 2401     | 083188230 | ---M---K-V-----         |
|                                           | <i>Prosthecochloris</i> sp. GSB1         | 094082256 | ---M-K---A-V-----       |
|                                           | <i>Chlorobi bacterium OLB7</i>           | KXX57455  | --T---L---ADKK-----     |
| Larger<br><i>Ignavibacteriae</i><br>Clade | <i>Ignavibacterium album</i> JCM 1651    | 385810439 | -----SK--P-KK-----S     |
|                                           | <i>Melioribacter roseus</i> P3M-2        | 397689128 | -----SK--YDKK-----S     |
|                                           | <i>Candidatus Kryptonium bacterium</i>   | HH065179  | ---L--V---AA-----       |
|                                           | <i>Candidatus Kryptonium thompsonii</i>  | 047133172 | -----SKII-P-KK-----S    |
|                                           | <i>Weissella cibaria</i>                 | 498059571 | ---YLGQ-V---RSS-----FN  |
|                                           | <i>Paenibacillus larvae</i>              | 558474612 | --T-IVQ-S-P-K-GQ---LFA  |
|                                           | <i>Saccharibacillus kuerlensis</i>       | 517806976 | --TMIVE-S-P-K-GQ---LFA  |
|                                           | <i>Listeria fleischmannii</i>            | 494740195 | ---FYGKI--RSN--Y---N    |
|                                           | <i>Lactobacillus oris</i>                | 489811830 | ---YFGQ-I---ASS-----N   |
|                                           | <i>Bacillus thuringiensis</i>            | 489348371 | ---YF-K-V---SAN-----N   |
|                                           | <i>Lactobacillus oris</i>                | 489810428 | ---YFGQ-I---ASS-----N   |
|                                           | <i>Bacillus anthracis</i>                | 497564380 | ---YF-K-V---SAN-----N   |
|                                           | <i>Bacillus cereus</i>                   | 488127310 | ---YF-K-V---SAN-----N   |
|                                           | <i>Weissella confusa</i>                 | 489703767 | ---YLGQII--RSS-----FN   |
|                                           | <i>Paenibacillus mucilaginosus</i>       | 337750739 | --TMIVE--P-R-GQ---LFA   |
|                                           | <i>Lactobacillus parabrevis</i>          | 518933426 | ---YFG--V---RSS-----N   |
|                                           | <i>Clostridium acetobutylicum</i>        | 15894863  | ---YLGK-V--NKAN-----N   |
|                                           | <i>Caloramator australicus</i>           | 496185404 | ---YFGK-V--NSN-----N    |
|                                           | <i>Nevskia ramosa</i>                    | 551356333 | ---YF---I-P-QAGQ-----N  |
|                                           | <i>Marinitoga piezophila</i>             | 374340297 | ---YGK-I---KSA-----N    |
|                                           | <i>Caldithrix abyssi</i>                 | 493986443 | --A--GK-I-RGMEA--Y---A  |
|                                           | <i>Flexistipes sinusarabici</i>          | 336324118 | ---FF---I-NDKSG-----N   |
|                                           | <i>Rhodospirillum centenum</i>           | 209966532 | A--M---S-P-MQ-----L-G   |
|                                           | <i>Syntrophus aciditrophicus</i>         | 85858063  | ---FFG--I---KSA-----N   |
|                                           | <i>Desulfohalobium retbaense</i>         | 258405958 | ---F--MV-E-KKA-----FS   |
|                                           | <i>Candidatus Methylophilum</i>          | 392374612 | --TF--S-I--GREG---C-A   |
|                                           | <i>Mariprofundus ferrooxydans</i>        | 497536274 | ---MY--MI-SHQSA-----FN  |
|                                           | <i>Aminobacterium colombiense</i>        | 294101413 | ---Y-S-L-PSRSA-----     |
|                                           | <i>Thermanaerovibrio acidaminovorans</i> | 269792021 | ---FS-IV---RSA-L-----   |
|                                           | <i>Thermanaerovibrio velox</i>           | 493632134 | ---FS-IV--DRSA-L-----   |
|                                           | <i>Sphaerochaeta globosa</i>             | 325970677 | ---YYT--I--QRSR-----FN  |
|                                           | <i>Candidatus Cloacimonas</i>            | 218961816 | --TMLSL--RDRQA-----T    |
|                                           | <i>Cand. Kryptobacter tengchongensis</i> | CUS92867  | -----SKII-P-KK-----S    |
|                                           | <i>Cand. Thermokryptus mobilis</i>       | 140944683 | -----SKII-PSKK-----S    |
|                                           | <i>Vagococcus salmoninarum</i>           | 126781782 | ---YF--II---RSN-----N   |
|                                           | <i>Marivibrio halodurans</i>             | 210683211 | -----HIA-P-L-----L-A    |
|                                           | <i>Carnobacterium alterfunditum</i>      | 143298371 | ---FGQ-I--Q-AN-----N    |
|                                           | <i>Ferruginivarius sediminum</i>         | 114580575 | -----A-E-VK--M--L-A     |
|                                           | <i>Oenococcus kitaharae</i>              | OEY83698  | ---YFGK-L-----AS-----FN |
|                                           | <i>Leuconostoc suionicum</i>             | 211636353 | ---YFGQII--KYSG-----N   |
|                                           | <i>Xylanibacillus composti</i>           | 213413321 | ---YF-KII---SN-----N    |
|                                           | <i>Acidaminobacter hydrogenoformans</i>  | 207646431 | ---YFGK-V---QAN-----N   |
|                                           | <i>Bacillus mesophilus</i>               | 163180499 | ---YF-K-V--Q-SN-----N   |
|                                           | <i>Psychrobacillus insolitus</i>         | 111438262 | ---YFGK-V---NAN-----N   |
| Other Bacteria                            |                                          |           | SFGKASAVIGPLVFGFVS      |
|                                           |                                          |           | T-----A-----L--         |
|                                           |                                          |           | I-----V--               |
|                                           |                                          |           | T-----IA-----L--        |
|                                           |                                          |           | T-----IA-----L--        |
|                                           |                                          |           | T-----IL--VI--V--       |
|                                           |                                          |           | T-----IV-----M--        |
|                                           |                                          |           | T-----IA-----L-M--      |
|                                           |                                          |           | -----IV--WI--LI-        |
|                                           |                                          |           | T-----IV--FL--VI-       |
|                                           |                                          |           | T-----IA-----L--        |
|                                           |                                          |           | T-----IA--VI--VI-       |
|                                           |                                          |           | T-----IV--VF--MI-       |
|                                           |                                          |           | -----I-----I--          |
|                                           |                                          |           | T-----IL--VL--I-        |
|                                           |                                          |           | T-----IA-----L--        |
|                                           |                                          |           | T-----IA-----L--        |
|                                           |                                          |           | T-----IA-----L--        |
|                                           |                                          |           | -----I-----I--          |
|                                           |                                          |           | T-----IV-----LI-        |
|                                           |                                          |           | T-----IL--VI--V--       |
|                                           |                                          |           | T-----IL--VL--I-        |
|                                           |                                          |           | T-----IA--MI--LI-       |
|                                           |                                          |           | F-----TL---IY-          |
|                                           |                                          |           | F--S--L-----L--         |
|                                           |                                          |           | F--S--IL-----IT-        |
|                                           |                                          |           | IA-N-----T--AI-         |
|                                           |                                          |           | F--S--IL-----           |
|                                           |                                          |           | I--F--I--AI--I--        |
|                                           |                                          |           | FS--V-SIV---LY-SIT      |
|                                           |                                          |           | FS--L-S-L---Y-S-T       |
|                                           |                                          |           | I--F--I--ALL-VIT        |
|                                           |                                          |           | IL--F--IL---V-L-T       |
|                                           |                                          |           | I--FA-IM--VLV-VTT       |
|                                           |                                          |           | IL--F--IL---V-L-T       |
|                                           |                                          |           | I--FA-IM--VLV-VTT       |
|                                           |                                          |           | IL--F--L--ILV-VIT       |
|                                           |                                          |           | I--F--IL--FMV-I--       |
|                                           |                                          |           | I--FA-IM--FLV-L-A       |
|                                           |                                          |           | ML--FA--L---V-I-A       |
|                                           |                                          |           | I--FA-I--FLV--F-        |
|                                           |                                          |           | LM--F-SIL--FT--L--      |
|                                           |                                          |           | ML--FA--L--FMM-L-A      |
|                                           |                                          |           | LT-R-IGF---AY-LAT       |
|                                           |                                          |           | I--FATIL---LMALA-       |
|                                           |                                          |           | ISA-FA-IV--F--AS-A      |
|                                           |                                          |           | LC--TASIL-----A--       |
|                                           |                                          |           | ML--FA--L---MM-MA-      |
|                                           |                                          |           | ISS-FAG---AI--LIT       |
|                                           |                                          |           | LSS-FAG-L--MA--VI-      |
|                                           |                                          |           | LSS-FAG-L--A--VI-       |
|                                           |                                          |           | ML--FA-I-----LM-V-T     |
|                                           |                                          |           | LT-RL-SI---ILY-WIA      |
|                                           |                                          |           | F--S--IL-----L--        |
|                                           |                                          |           | F--S--IL-----T--        |
|                                           |                                          |           | I--F--L--I--VMT         |
|                                           |                                          |           | LS--T-FM---IV-W-T       |
|                                           |                                          |           | I--FA--V---LV-II-       |
|                                           |                                          |           | LS--MT-F--AIV-W--       |
|                                           |                                          |           | I--F--I--FL--           |
|                                           |                                          |           | I--F--L-----S-A         |
|                                           |                                          |           | I--FASIM---LV-          |
|                                           |                                          |           | I--FA-IM--FLV--T        |
|                                           |                                          |           | I--FA-IM--LV-VTA        |
|                                           |                                          |           | I--FA-IM--IVA-T-        |

Figure S10

Partial sequence alignment of the protein major facilitator superfamily transporter, showing a 1 aa insertion (boxed) that is specific for members of the order *Chlorobiales*. Except for an isolated exception shown here, the CSI was not found in any other bacterial species in the top 500-BLASTp hits.

|                              |                                            |           |                  |                                   |
|------------------------------|--------------------------------------------|-----------|------------------|-----------------------------------|
|                              |                                            | 294       |                  | 340                               |
|                              | <i>Chlorobium luteolum</i>                 | 78187124  | YLRHLTWEGAREKYG  | DNPE DGITPEDVKERIELELGVIEKMGFSSYF |
|                              | <i>Prosthecochloris vibrioformis</i>       | 139626774 | -----Y---KV--A   | -PAS Q-L-WQ--EA---R--D--TS-----   |
|                              | <i>Chlorobium phaeobacteroides</i>         | 642923410 | -----Y---KK--A   | -HDS Q-LSW-KIE---K-----IS-----    |
|                              | <i>Chlorobium chlorochromatii</i>          | 78188863  | -----A---A       | KSE- E--SQ-E-----                 |
|                              | <i>Chlorobium phaeobacteroides</i>         | 119357011 | -----K---A       | -SGA ---SS---EA-----              |
|                              | <i>Chlorobium limicola</i>                 | 189346342 | -----A---A       | GSEA ---E---RA-----               |
|                              | <i>Chlorobium ferrooxidans</i>             | 493409850 | --S-----K---A    | -SEA E--SK-E--S-----              |
|                              | <i>Chlorobium phaeovibrioides</i>          | 145219820 | -----A---K---P   | GIS- -EPSQ-E-RD-----              |
|                              | <i>Chlorobium phaeoclathratiforme</i>      | 194336619 | -----L---K---A   | -ADA ---SA---RA-----              |
|                              | <i>Prosthecochloris vibrioformis</i>       | 139626774 | -----Y---KV--A   | -PAS Q-L-WQ--EA---R--D--TS-----   |
|                              | <i>Prosthecochloris marina</i>             | 110023626 | -----Y---K---A   | -PES Q-LSEKM-N---K--ET-SS-----    |
|                              | <i>Chloroherpeton thalassium</i>           | 193215617 | -----Y---KK--A   | -LDA M-EKGAE-R---Y--SI-C---YAT--  |
|                              | <i>Prosthecochloris aestuarii</i>          | 194333751 | -----Y---A       | -PES Q-L-WQ-ED---K-----IS-----    |
| Order<br><b>Chlorobiales</b> | <i>Chlorobaculum thiosulfatiphilum</i>     | TNJ36552  | -----N---        | V- --AI--E--A---F-----Y-A--       |
|                              | <i>Chlorobaculum tepidum</i>               | 21673669  | -----K---        | AA --TI--E--A-----Y-A--           |
|                              | <i>Chlorobaculum limnaeum</i>              | 250189496 | -----S---        | S- --AV-D--A-V-----Y-A--          |
|                              | <i>Chlorobaculum parvum</i>                | 193212527 | -----N---        | V- --AI--E-----Y-A--              |
|                              | <i>Candidatus Chlorobium masyuteum</i>     | 166808752 | --S-----K---A    | -SEA E--SK-E--S-----              |
|                              | <i>Cand. Thermochlorobacter aerophilum</i> | RFM23112  | --Y--YQ--LR--    | NLDA L-ERG-QIRN---Y--NT-A-----    |
|                              | <i>Chlorobium sp. N1</i>                   | 131353551 | -----K---        | Q--S ---K-----                    |
|                              | <i>Chlorobium sp. KB01</i>                 | 076790384 | --S-----K---A    | -SEA E---K---A-----               |
|                              | <i>Prosthecochloris sp. CIB 2401</i>       | 068867018 | -----Y---KV--A   | -PAS Q-L-WQ--EA---R--D--TS-----   |
|                              | <i>Prosthecochloris sp. GSB1</i>           | 094082691 | -----Y-----A     | -PEA G-L-WKM-E---K-----IS-----    |
| Ignavibacteriae              | <i>Prosthecochloris sp. HL-130-GSB</i>     | 085659708 | -----Y---K-A     | -PES Q-L-WQ-ED---K-----TS-----    |
|                              | <i>Prosthecochloris sp. ZM</i>             | 167399480 | -----Y-----A     | -PES Q-L-WQ-ED---K-----IS-----    |
|                              | <i>Meliobacter roseus P3M-2</i>            | 397689293 | --TQ-AY--LHRRFK  | KVTREIED-MKY--D--I---YAG--        |
|                              | <i>Porphyromonas asaccharolytica</i>       | 332299966 | -----Y---KKR--   | DPV-PE-Q---DM-----QN---PG--       |
|                              | <i>Gracilimonas tropica</i>                | 521069907 | --K---Y---PR-K   | EID-E-T-----I---E---AG--          |
|                              | <i>Porphyromonas endodontalis</i>          | 490463816 | --Q---Y---KMR--  | DPI--E-----DF--NT-KS---PG--       |
|                              | <i>Dokdonia donghaensis</i>                | 85818192  | F---VY---KKR--   | EELS-E-T--LDF--D---T-YPG--        |
|                              | <i>Capnocytophaga sputigena</i>            | 488757420 | -----Y---KR--P   | EITDE-R--LDF--SI---T-YPG--        |
|                              | <i>Capnocytophaga ochracea</i>             | 488750278 | -----Y---KR--P   | EITDE-R--LDF--SI---T-YPG--        |
|                              | <i>Niabella aurantiaca</i>                 | 517457778 | -----Y---QIR--   | VM-DST---DF--FT-KT---AG--         |
| Other Bacteria               | <i>Chryseobacterium gleum</i>              | 489070762 | --T---Y---KNR--  | EEGITDEI---LDF--E--ANT-YPG--      |
|                              | <i>Croceibacter atlanticus</i>             | 298207508 | F-K---Y---K-R--  | EITPEI---LDF--SI---T-YPG--        |
|                              | <i>Kordia algicida</i>                     | 494155458 | -----Y---KKR--   | EITPEIE--LDF--T--NT-YPG--         |
|                              | <i>Rhodothermus marinus</i>                | 268317469 | --D-VF---RR--    | DPL-HE-A--L-H-AI-K---AG--         |
|                              | <i>Cecembia lonarensis</i>                 | 496475077 | -----Y---KKR-P   | VITDEI---LDF--ET--RT-YPG--        |
|                              | <i>Porphyromonas catoniae</i>              | 491609864 | -----Y---KR---   | DELT-T-R---DF--ET-AN---PG--       |
|                              | <i>Empedobacter brevis</i>                 | 518818409 | --K---Y---KKR-V  | ELTDEI---DF--AT---T-YPG--         |
|                              | <i>Niabella soli</i>                       | 495857618 | --K---Y---QKR--  | SM-DST---DF--FT-KT---AG--         |
|                              | <i>Ornithobacterium rhinotracheale</i>     | 392390690 | -----Y---KQR--   | EITPEIT--LDF--AT--NT-YPG--        |
|                              | <i>Zobellia galactanivorans</i>            | 340618163 | ----I-Y---KKR--  | EITPEID--LDF--K---T-YPG--         |
|                              | <i>Bizionia argentinensis</i>              | 495915021 | F----YM---KKR--  | EELT-EIT--LDF--S---NT-YPG--       |
|                              | <i>Polaribacter franzmannii</i>            | 517772471 | F-K---FV---KKR-- | EIT-SI---LDF--S---T-YPG--         |
|                              | <i>Microscilla marina</i>                  | 488781602 | -----Y---TKR--   | EIT-EIR--LDH--NI-KS---PG--        |
|                              | <i>Chitinophaga pinensis</i>               | 256423694 | ----I-M---HK--A  | EVTAE-E---NF--S---N---AG--        |
|                              | <i>Galbibacter marinus</i>                 | 496279563 | --K---YQ---KRR-A | EIT-EI---LDF--S---NT-YPG--        |
|                              | <i>Psychroflexus tropicus</i>              | 517866879 | --K---F---K-R--  | ELS--I---L-F--S---ANT-YPG--       |
|                              | <i>Joostella marina</i>                    | 495886298 | -----Y---KRR-P   | EIT-SI---LDF--S---NT-YPG--        |
|                              | <i>Lewinella cohaerens</i>                 | 522026781 | -----Y---KRR-D   | TITPAI---LDF--K---S-YPG--         |
|                              | <i>Eudoraea adriatica</i>                  | 518500380 | ----I-Y---KKR--  | EITDEIR---DF--KTV-NS-YPG--        |
|                              | <i>Elizabethkingia anophelis</i>           | 496382600 | F----Y---K-E     | EITDEIR--LDF--DI-A-T-YPG--        |
|                              | <i>Indibacter alkaliphilus</i>             | 496327208 | -----Y---KKR-K   | EITDEI---LDF--AT--NT-YPG--        |
|                              | <i>Elizabethkingia meningoseptica</i>      | 544939559 | F----Y---K-E     | EITDEIR--LDF--DI-A-T-YPG--        |
|                              | <i>Saprospira grandis</i>                  | 379731533 | -----Y---KRR--   | SITPAI---LDF--E--RQS-YPG--        |
|                              | <i>Cyclobacterium marinum</i>              | 343084733 | F----Y---KKR--   | EITDEIR--LDF--ET--RT-YPG--        |
|                              | <i>Cellulophaga lytica</i>                 | 325286607 | F----Y---KIR--   | EITPEID--LDF--K---T-YPG--         |
|                              | <i>Cesiribacter andamanensis</i>           | 496488129 | -----Y---KR-P    | AITPEIQ--LDF--ET-A-T-YPG--        |
|                              | <i>Porphyromonas gingivalis</i>            | 34539911  | ---F--Y---R---   | EDLSDEI---DF--ET-KG---PG--        |
|                              | <i>Planctomyces limnophilus</i>            | 296121580 | --Q---Q---EQR-P  | HGL--KIRHLL-H--NL--ELRYEP--       |
|                              | <i>Rhodopirellula europaea</i>             | 495942656 | H-KR-----GRWP    | -GV--K-I-TLRH-VTL--DLQYEA--       |
|                              | <i>Dictyoglomus turgidum</i>               | 217967773 | -FEK-C---KKRF-   | ENI-QEI---LSY-IS--KQ---G--        |
|                              | <i>Patulibacter medicamentivorans</i>      | 494846815 | ---AQVE--L-AR--  | DPI-AAAR--A-M-----NR--YDA--       |

Figure S11

Partial sequence alignment of the protein DNA polymerase III subunit alpha, showing a 2-4 aa insert (boxed) that is specific for all members belonging to the order *Chlorobiales*

|                              |                                              | 103        | 137                                     |
|------------------------------|----------------------------------------------|------------|-----------------------------------------|
| Order<br><i>Chlorobiales</i> | <i>Chlorobium phaeobacteroides</i>           | 119356086  | DDKAIVGGFAILED IP SGFS QPVMII GHQKGRDTK |
|                              | <i>Chlorobium ferrooxidans</i>               | 493410149  | -----RI-- SA-----                       |
|                              | <i>Chlorobium luteolum</i>                   | 78187798   | -----R-- RA--Y- ---V-----               |
|                              | <i>Chlorobium phaeovibrioides</i>            | 145220402  | -----RI-- RV-----V-----                 |
|                              | <i>Chlorobium phaeoclathratiforme</i>        | 194337654  | ----I---RI-E SAT---                     |
|                              | <i>Chlorobaculum tepidum</i>                 | 21673002   | ----I---R-- ESA--S-V-----               |
|                              | <i>Chlorobium limicola</i>                   | 189345751  | -----R-E SA-----T-M-----                |
|                              | <i>Chlorobium chlorochromatii</i>            | 78188341   | ----I---R-- EAA--S-M-----               |
|                              | <i>Chlorobaculum parvum</i>                  | 193213516  | ----I--L-R-- KD--S-V-----               |
|                              | <i>Prosthecochloris aestuarii</i>            | 194333138  | -----RI-- SEAS--T-V-----                |
|                              | <i>Chlorobium phaeobacteroides</i>           | 189499305  | ---LI---RI-- EERD--T-V-----             |
|                              | <i>Chloroherpeton thalassium</i>             | 193215260  | -----K-T DEQR--KT-----                  |
|                              | <i>Chlorobaculum limnaeum</i>                | 2501894381 | N----I---RI-- EAT--S-V-----             |
|                              | <i>Prosthecochloris marina</i>               | 110022889  | -----RI-E EE--K--T-V-----               |
|                              | <i>Chlorobaculum thiosulfatiphilum</i>       | 139457840  | ----I---R-A EAT--S-V-----               |
|                              | <i>Candidatus Chlorobium masyuteum</i>       | 166807605  | -----RI-E PST-----                      |
|                              | <i>Candidatus Thermochlorobacteri GBCh1B</i> | KER09150   | ----I---K-S GQ--G-AV-----               |
|                              | <i>Cand. Thermochlorobacter aerophilum</i>   | RFM23425   | -----RMI- EDGRA--T-----                 |
|                              | <i>Chlorobium sp. N1</i>                     | 131354938  | -----R-- RA--Y- ---V-----               |
|                              | <i>Chlorobium sp. 445</i>                    | PI048713   | -----L-RMV DDHH--T-----                 |
|                              | <i>Chlorobium sp. KB01</i>                   | 076789707  | -----RI-- SA--R-----                    |
|                              | <i>Chlorobaculum sp. 24CR</i>                | 129050980  | ----I---R-- EAT--S-V-----R              |
|                              | <i>Prosthecochloris sp. HL-130-GSB</i>       | 085658914  | -----R-- RDLS--RT-V-----                |
|                              | <i>Prosthecochloris sp. GSB1</i>             | 094081818  | -----TIG- EADD-F--T-V-----              |
| <i>Ignavibacteriae</i>       | <i>Ignavibacterium album</i>                 | 78187798   | -----L-Q-GN HK-V-M-Q-----               |
|                              | <i>Melioribacter roseus</i>                  | 397689297  | -----K-DG -K-----                       |
|                              | <i>Glaciecola polaris</i>                    | 494165670  | ----I--L-L-DE --I-V-----                |
|                              | <i>Salinimonas chungwhensis</i>              | 517813267  | ----I--L-M-D- ---L-----                 |
|                              | <i>Glaciecola chathamensis</i>               | 495264166  | ----I--L-M-DE --I-V-----                |
|                              | <i>Pseudoalteromonas atlantica</i>           | 109897590  | ----I--L-M-DE --I-V-----                |
|                              | <i>Erwinia piriflorinigrans</i>              | 562748821  | -----I-R-- R-----E--                    |
|                              | <i>Morganella morganii</i>                   | 571171262  | -----L-R-G R--V-----                    |
|                              | <i>Erwinia pyrifoliae</i>                    | 259907558  | -----I-R-- R-----E--                    |
|                              | <i>Vibrio metschnikovii</i>                  | 490529482  | -----I-R-D- -----E-R                    |
| Other Bacteria               | <i>Erwinia amylovora</i>                     | 312173371  | -----I-R-- R-----E--                    |
|                              | <i>Providencia sneebia</i>                   | 496196770  | -----I-R-G ---V-----E--                 |
|                              | <i>Alteromonas macleodii</i>                 | 406595876  | -----P-M-D- -----N                      |
|                              | <i>Dickeya zeae</i>                          | 515508915  | -----I-R-D- R-----E--                   |
|                              | <i>Glaciecola arctica</i>                    | 494895163  | -----L-KIDG -----                       |
|                              | <i>Dickeya dadantii</i>                      | 271499511  | -----I-R-D- R-----E--                   |
|                              | <i>Nitrococcus mobilis</i>                   | 491140726  | --P-----V-R-G ---V-----                 |
|                              | <i>Salmonella enterica</i>                   | 487762226  | -----I-R-G R-----E--                    |
|                              | <i>Yersinia mollaretii</i>                   | 491012799  | -----I-R-G R-----E--                    |
|                              | <i>Shigella flexneri</i>                     | 491248512  | -----I-R-DG R-----E--                   |
|                              | <i>Yersinia frederiksenii</i>                | 490844621  | -----I-R-DG R-----                      |
|                              | <i>Yersinia ruckeri</i>                      | 490857600  | -----I-R-G R-----E--                    |
|                              | <i>Geobacter daltonii</i>                    | 222056374  | --H-----L-R-DG E--V-----                |
|                              | <i>Geobacter uraniireducens</i>              | 148264551  | --H-----L-R-DG V--V-----                |
|                              | <i>Solitalea canadensis</i>                  | 387792181  | -----TIDG -----KN--                     |
|                              | <i>Thermotomaculum hydrothermale</i>         | 201328645  | -----F-D- I--C--Q-----                  |
|                              | <i>Alteromonas macleodii</i>                 | HB176693   | -----P-M-D- -----N                      |
|                              | <i>Salinimonas lutimaris</i>                 | 137167805  | ----L--L-M-D- --I-L-----                |
|                              | <i>Morganella morganii</i>                   | HBH7053723 | ----I--L-R-G R--V-----                  |
|                              | <i>Vibrio metschnikovii</i>                  | 217523606  | -----I-R-D- -----E-R                    |
|                              | <i>Bowmanella denitrificans</i>              | 102796617  | -----L-R-D- -----                       |
|                              | <i>Klebsiella pneumoniae</i>                 | NGE24729   | -----L-R-G R--V-----                    |
|                              | <i>Providencia sneebia</i>                   | 008916607  | -----I-R-G ---V-----E--                 |

Figure S12

Partial sequence alignment of the protein acetyl-CoA carboxylase carboxyltransferase subunit alpha, showing a 6 aa insertion (boxed) that is found in all members belonging to the order *Chlorobiales*

|                                   |                                           |                                        |                             |                           |                 |
|-----------------------------------|-------------------------------------------|----------------------------------------|-----------------------------|---------------------------|-----------------|
| Order<br><i>Chlorobiales</i>      | <i>Chloroherpeton thalassium</i>          | 193214252                              | LHVHYAIPHAMSALLAKEMLKEKEDRH | QNF                       | KLVTTLHGTDITIVG |
|                                   | <i>Chlorobium phaeoclathratiforme</i>     | 194335958                              | V-A-----L--M--RQ-IED-CSEL   | KC-                       | -----V--        |
|                                   | <i>Chlorobium phaeobacteroides</i>        | 189500750                              | V-A-----L--M--RQ--EDSCSEA   | KC-                       | --A-----V--     |
|                                   | <i>Chlorobaculum tepidum</i>              | 21673383                               | V-A-----I--M--RQ--E--CPAA   | EC-                       | RI-----         |
|                                   | <i>Chlorobium luteolum</i>                | 78186436                               | V-A-----M--RQ--EDRCPDA      | SC-                       | R-A-----V--     |
|                                   | <i>Chlorobaculum parvum</i>               | 193213088                              | V-A-----I--V--RQ--E-RCPEs   | -C-                       | RIA-----        |
|                                   | <i>Chlorobium ferrooxidans</i>            | 493410448                              | V-A-----M--RQ--ED-CCGS      | NC-                       | -IA-----V--     |
|                                   | <i>Chlorobium limicola</i>                | 189346053                              | V-A-----L--M--RQ--ED-CAEA   | RC-                       | R-A-----V--     |
|                                   | <i>Chlorobium chlorochromatii</i>         | 78189259                               | V-A-----L--M--LQ--ED-CAAA   | HC-                       | -----V--        |
|                                   | <i>Chlorobium phaeovibrioides</i>         | 145219409                              | V-A-----M--RQ--ED-CPQR      | DC-                       | R-A-----V--     |
|                                   | <i>Prosthecochloris marina</i>            | 110023977                              | V-A-----L--M--RQ--E-SCSDA   | RC-                       | R-A-----V--     |
|                                   | <i>Prosthecochloris aestuarii</i>         | 194333524                              | V-A-----L--I--RQ-VED-CSKA   | -C-                       | RIA-----V--     |
|                                   | <i>Chlorobaculum limnaeum</i>             | 2501893378                             | V-A-----I--M--RQ--E--CPAA   | EC-                       | RI-----         |
|                                   | <i>Chlorobaculum thiosulfatiphilum</i>    | 139456871                              | V-A-----I--M--RQ--E--CPAS   | EC-                       | RI-----         |
|                                   | <i>Candidatus Chlorobium masyuteum</i>    | 166808429                              | V-A-----M--RQ--ED-CSSS      | KC-                       | R-A-----V--     |
|                                   | <i>Chlorobium</i> sp. N1                  | 131358741                              | V-A-----M--RQ--ED-CPER      | GC-                       | R-A-----V--     |
|                                   | <i>Chlorobium</i> sp. KB01                | 076792893                              | V-A-----M--RQ--ED-CCGS      | NC-                       | -IA-----V--     |
|                                   | <i>Prosthecochloris</i> sp. ZM            | 114617556                              | V-A-----L--I--RQ-VED-CSKA   | -C-                       | RIA-----V--     |
|                                   | <i>Prosthecochloris</i> sp. GSB1          | 094082046                              | V-A-----L--I--RQ--ED-CSES   | RC-                       | R-A-----V--     |
|                                   | <i>Chlorobaculum</i> sp. 24CR             | RXK88293                               | V-A-----I--M--RQ--E--CPAS   | EC-                       | RIA-----        |
|                                   | Larger<br><i>Ignavibacteriae</i><br>Clade | <i>Prosthecochloris</i> sp. HL-130-GSB | 085659945                   | V-A-----L--M--RQ--ADTCRDA | DC-             |
| <i>Chlorobi bacterium NICIL-2</i> |                                           | KXB98016                               | -----V-GY--QV-ARDGIQL       |                           | RV-----L--      |
| <i>Chlorobi bacterium OLB6</i>    |                                           | KXK33709                               | V-----V-GF--SLI--D-YPF      |                           | --L-----L--     |
| <i>Chlorobi bacterium OLB7</i>    |                                           | KXK52241                               | -----S--YM--LI--N-QGRDI     |                           | -II-----LI-     |
| <i>Melioribacter roseus</i>       |                                           | 397689377                              | M-----V--Y--QIR-KSNGDI      |                           | -FI-----LM-     |
| <i>Ignavibacterium album</i>      |                                           | 385811286                              | V-----T--Y-----KGYCDL       |                           | -II-----L--     |
| <i>Runella slithyformis</i>       |                                           | 338212610                              | -----S--Y--QI--SQGIHI       |                           | PFI-----L--     |
| <i>Marivirga tractuosa</i>        |                                           | 313677397                              | -----SA-YM--QI--NINI        |                           | PV-----L--      |
| <i>Leadbetterella byssophila</i>  |                                           | 312129374                              | -----T--F--QI--QQEGLDI      |                           | PVI-----        |
| <i>Chitinophaga pinensis</i>      |                                           | 256420235                              | -----ST-Y--QIVSKQGRIV       |                           | PFI-----L--     |
| Other<br>Bacteria                 | <i>Nafulsella turpanensis</i>             | 516341204                              | -----SA-YM--QI--TQGIDI      |                           | PV-----L--      |
|                                   | <i>Flexithrix dorotheae</i>               | 522020948                              | -----SA-YM--QI--T-GINI      |                           | PF-----L--      |
|                                   | <i>Ornithobacterium rhinotracheale</i>    | 392389713                              | -----YA-YI--QI--RGKDL       |                           | PII-----L--     |
|                                   | <i>Echinicola vietnamensis</i>            | 431796158                              | -----SA-YM--QI--TQGIEI      |                           | PV-----L--      |
|                                   | <i>Flexibacter litoralis</i>              | 392399217                              | -----S--YM--QI--TEGIIQI     |                           | PV-----L--      |
|                                   | <i>Sphingobacterium paucimobilis</i>      | 544633139                              | -----SA-Y--QI--RSYGIDI      |                           | PV-----L--      |
|                                   | <i>Algoriphagus machipongonensis</i>      | 495478511                              | -----SA-YM--QI--EGIQI       |                           | PV-----L--      |
|                                   | <i>Fulvivirga imtechensis</i>             | 497269414                              | -----SA-YM--QI--TEGINI      |                           | PV-----L--      |
|                                   | <i>Cesiribacter andamanensis</i>          | 496488412                              | -----SA-YM--QI--SQGISI      |                           | PV-----L--      |
|                                   | <i>Emticicia oligotrophica</i>            | 408674449                              | -----T--F--QI--CHGINI       |                           | PII-----        |
|                                   | <i>Cyclobacterium marinum</i>             | 343085183                              | -----SA-YM--QI--KQGVII      |                           | PV-----L--      |
|                                   | <i>Cyclobacterium qasimii</i>             | 527057196                              | -----SA-YM--QI--KQGIVI      |                           | PV-----L--      |
|                                   | <i>Microscilla marina</i>                 | 488785813                              | -----SA-YM--QI--SEGISI      |                           | PVI-----L--     |
|                                   | <i>Capnocytophaga granulosa</i>           | 512456577                              | I-A-----YT-YM--QI-EKEGLDV   |                           | -II-----L--     |
|                                   | <i>Fluviicola taffensis</i>               | 327405499                              | -----SA-FM-QQI--AQGINI      |                           | PFI-----L--     |
|                                   | <i>Mariniradius saccharolyticus</i>       | 495902631                              | -----SA-YM--QI--EGIHI       |                           | PV-----L--      |
|                                   | <i>Niabella aurantiaca</i>                | 517456348                              | -----SA-YM--KI-EKEGKHI      |                           | PVI-----L--     |
|                                   | <i>Rhodonellum psychrophilum</i>          | 518426151                              | -----SA-YM--QI--EGIHI       |                           | PV-----L--      |
|                                   | <i>Bacillus selenitireducens</i>          | 297584395                              | -----I--Y--Q-V-KDV          |                           | -II-----VL-     |
|                                   | <i>Terriglobus roseus</i>                 | 390959900                              | -----SV----RQ--EA-GI-L      |                           | PFI-----L--     |
|                                   | <i>Acidobacterium capsulatum</i>          | 225872421                              | -----I--F--R--AKRGLHI       |                           | PI-----L--      |
|                                   | <i>Thermincola potens</i>                 | 296133833                              | -----V--Y--Q--GELEL         |                           | PVI-----        |
|                                   | <i>Lutibacter agarilyticus</i>            | 089380012                              | -----YA-YM--Q--GIDI         |                           | -V-----L--      |
|                                   | <i>Acidipila dinghuensis</i>              | 129208410                              | -----SI--Y--RQ--A--RRL      |                           | PF-----L--      |
|                                   | <i>Aureivirga marina</i>                  | 196892692                              | -----YA-YM--Q--GIDI         |                           | -VI-----L--     |
|                                   | <i>Polaribacter sejongensis</i>           | 208889400                              | -----YA-YM--Q--GLDV         |                           | RV-----L--      |
|                                   | <i>Marivirga tractuosa</i>                | 013455427                              | -----SA-YM--QI--NIKI        |                           | PV-----L--      |
| <i>Flavicella marina</i>          | 152286514                                 | -----YA-FM--Q--QGIDI                   |                             | -V-----L--                |                 |

Figure S13

Partial sequence alignment of the protein N-acetyl-alpha-D-glucosaminyl L-malate synthase BshA, showing a 3 aa insertion (boxed) that is found in all members belonging to the order *Chlorobiales*.

|                                             |                                              |              |                               |
|---------------------------------------------|----------------------------------------------|--------------|-------------------------------|
|                                             |                                              | 228          | 278                           |
| <b>Order<br/>Chlorobiales</b>               | <i>Chlorobium limicola</i>                   | WP_041466021 | KTLLRGPRGGMIMMGSDFFENPLGI     |
|                                             | <i>Chlorobium luteolum</i>                   | WP_011358316 | -----K-----M--                |
|                                             | <i>Candidatus Chlorobium masyuteu</i>        | WP_166806951 | -----M-----                   |
|                                             | <i>Chlorobium sp. KB01.</i>                  | WP_076791726 | -----M-----                   |
|                                             | <i>Chlorobium sp. N1</i>                     | WP_131354081 | -----R-----M--                |
|                                             | <i>Chlorobium phaeobacteroides</i>           | WP_011744490 | -----M-----                   |
|                                             | <i>Chlorobium phaeovibrioides</i>            | WP_011890615 | -----K-----M--                |
|                                             | <i>Pelodictyon phaeoclathratiforme</i>       | WP_012507517 | -----M-----                   |
|                                             | <i>Chlorobium ferrooxidans</i>               | WP_006365450 | -----M-----                   |
|                                             | <i>Chlorobaculum tepidum</i>                 | WP_010933254 | -----K-----L--                |
|                                             | <i>Chlorobaculum thiosulfatophilum</i>       | WP_139456325 | -----K-----L--                |
|                                             | <i>Chlorobaculum parvum</i>                  | WP_012502749 | -----K-----M--                |
|                                             | <i>Chlorobaculum limnaeum</i>                | WP_069808880 | -----DK-----L--               |
|                                             | <i>Prosthecochloris ethylica</i>             | WP_114608737 | -----Q-----M--                |
|                                             | <i>Prosthecochloris vibrioformis</i>         | WP_139626252 | -----K-----                   |
|                                             | <i>Prosthecochloris aestuarii</i>            | WP_012505177 | -----E-----M--                |
|                                             | <i>Prosthecochloris marina</i>               | WP_110024280 | -----Q-----                   |
|                                             | <i>Chloroherpeton thalassium</i>             | WP_012500494 | -----L-K-----M--              |
|                                             | <i>Cand. Thermochlorobacteriaceae GBCh1B</i> | KER09762.1   | -----L-K-----F--              |
|                                             | <i>Chlorobium sp. 445</i>                    | PI047396.1   | -----L-K-----F--              |
| <b>Larger<br/>Ignavibacteriae<br/>Clade</b> | <i>Chlorobi bacterium OLB7</i>               | KXK56915.1   | -----V-L-K-----F--            |
|                                             | <i>Chlorobi bacterium OLB4</i>               | KXK04106.1   | -----I-L-K-----TF--           |
|                                             | <i>Chlorobi bacterium OLB5</i>               | KXK53076.1   | -----L-A-----F-L              |
|                                             | <i>Chlorobi bacterium OLB6</i>               | KXK35191.1   | -----L-LL-K-V-----F-V         |
|                                             | <i>Ignavibacteriales bacterium UTCHB3</i>    | OQY75246.1   | -----V-L-K-----F--            |
|                                             | <i>Melioribacter roseus</i>                  | WP_014854729 | -----V-LI-K-K-----M--         |
|                                             | <i>Ignavibacterium album</i>                 | WP_014560320 | -----I-LI-K-K-----W-L         |
|                                             | <i>Cand. Kryptonium thompsoni</i>            | WP_047133370 | -----L-L-HK-R-----F--         |
|                                             | <i>Cand. Kapabacteria thiocyanatum</i>       | OJX61272.1   | -----L-I-KNY-----F-V          |
|                                             | <i>Rhodothermus marinus</i>                  | WP_012842647 | -----LI-R--D--F--             |
| <b>Other Bacteria</b>                       | <i>Bacteroides fragilis</i>                  | WP_008768732 | -----V--K--P--W-K             |
|                                             | <i>Phocaeicola massiliensis</i>              | WP_117462813 | -----V--K--P--W-K             |
|                                             | <i>Salinibacter ruber</i>                    | WP_118838368 | -----LL-D-Y--M-K              |
|                                             | <i>Cytophaga aurnatiaca</i>                  | WP_018341732 | -----V--K-----F-L             |
|                                             | <i>Sinomicrobium oceani</i>                  | WP_072318454 | -----K-----F--                |
|                                             | <i>Thermaurantiimonas aggregans</i>          | WP_124398693 | -----L-L-K-----F-K            |
|                                             | <i>Seonamhaeicola marinus</i>                | WP_148541715 | -----Q-----F--                |
|                                             | <i>Schleiferia thermophila</i>               | WP_037361247 | -----L-L-N-----F-K            |
|                                             | <i>Snueella sedimenti</i>                    | WP_199115674 | -----E--D--F--                |
|                                             | <i>Tamlana sedimentorum</i>                  | WP_044632150 | -----K-----F--                |
|                                             | <i>Flavobacterium koreense</i>               | AFR46549     | -----K-----W-L                |
|                                             | <i>Seonamhaeila aphaedonensis</i>            | WP_116039982 | -----L--K-----F--             |
|                                             |                                              |              | TI KTKTGSRVKMMSEVMDAEVMPGIQGG |
|                                             |                                              |              | ---N-P-----                   |
|                                             |                                              |              | -----                         |
|                                             |                                              |              | -----M-----                   |
|                                             |                                              |              | ---N-P-----                   |
|                                             |                                              |              | -----T-----                   |
|                                             |                                              |              | ---N-Q-----                   |
|                                             |                                              |              | -----L-----                   |
|                                             |                                              |              | -----                         |
|                                             |                                              |              | N--N-----I-----               |
|                                             |                                              |              | N--N-P-----                   |
|                                             |                                              |              | N--N-P-----I-----             |
|                                             |                                              |              | N--N-P-----                   |
|                                             |                                              |              | N--N-P-----                   |
|                                             |                                              |              | ---R-T-----I--I-----          |
|                                             |                                              |              | ---N-P-T-----I--I-----        |
|                                             |                                              |              | ---A-R-T-----I--I-----        |
|                                             |                                              |              | ---K-V-T-----I--I-----        |
|                                             |                                              |              | KA---E-I--V--LL--M-----       |
|                                             |                                              |              | KL---E-L-L---L-T---V---       |
|                                             |                                              |              | KV---E-L---L-T---V---         |
|                                             |                                              |              | VAPKSG-T-----II-SW-----       |
|                                             |                                              |              | VA-S--T-----LI-SM-----        |
|                                             |                                              |              | TAPKSG-----LI-SM-I--V---      |
|                                             |                                              |              | AP-S--LI-SM-----              |
|                                             |                                              |              | TVPKTG-A-----LI-STI-----      |
|                                             |                                              |              | --VK-D-L-L---IF-GM-----       |
|                                             |                                              |              | T-PK-D-----LI-GM-----         |
|                                             |                                              |              | --PK-D-LR---II-GT-----        |
|                                             |                                              |              | AP-S--T-L-G-LI-SM-----        |
|                                             |                                              |              | TA-S--I-K---LL-SA-F--T---     |
|                                             |                                              |              | KPK- EI---QLL-SA-F-----       |
|                                             |                                              |              | -PK- EI---QLL-SA-F-----       |
|                                             |                                              |              | TARKSG-T-----LL-SA-F--T---    |
|                                             |                                              |              | -PK-E -R---N-L-MG-F--T---     |
|                                             |                                              |              | -LKNGKPR---SLL-SA-F--N---     |
|                                             |                                              |              | -PK- EIR---SLI--A-F--V---     |
|                                             |                                              |              | -LKSGKLRK--SLL-SA-F--N---     |
|                                             |                                              |              | -LKNGSLRK--SLL-SA-F--N---     |
|                                             |                                              |              | -PK- EIR---H-L-MS-F--N---     |
|                                             |                                              |              | -LKSGKLRK--SLL-SA-F--N---     |

Figure S14

Partial sequence alignment of the protein Serine hydroxymethyltransferase, showing a 2 aa insertion (boxed) that is found in all members belonging to the order *Chlorobiales*

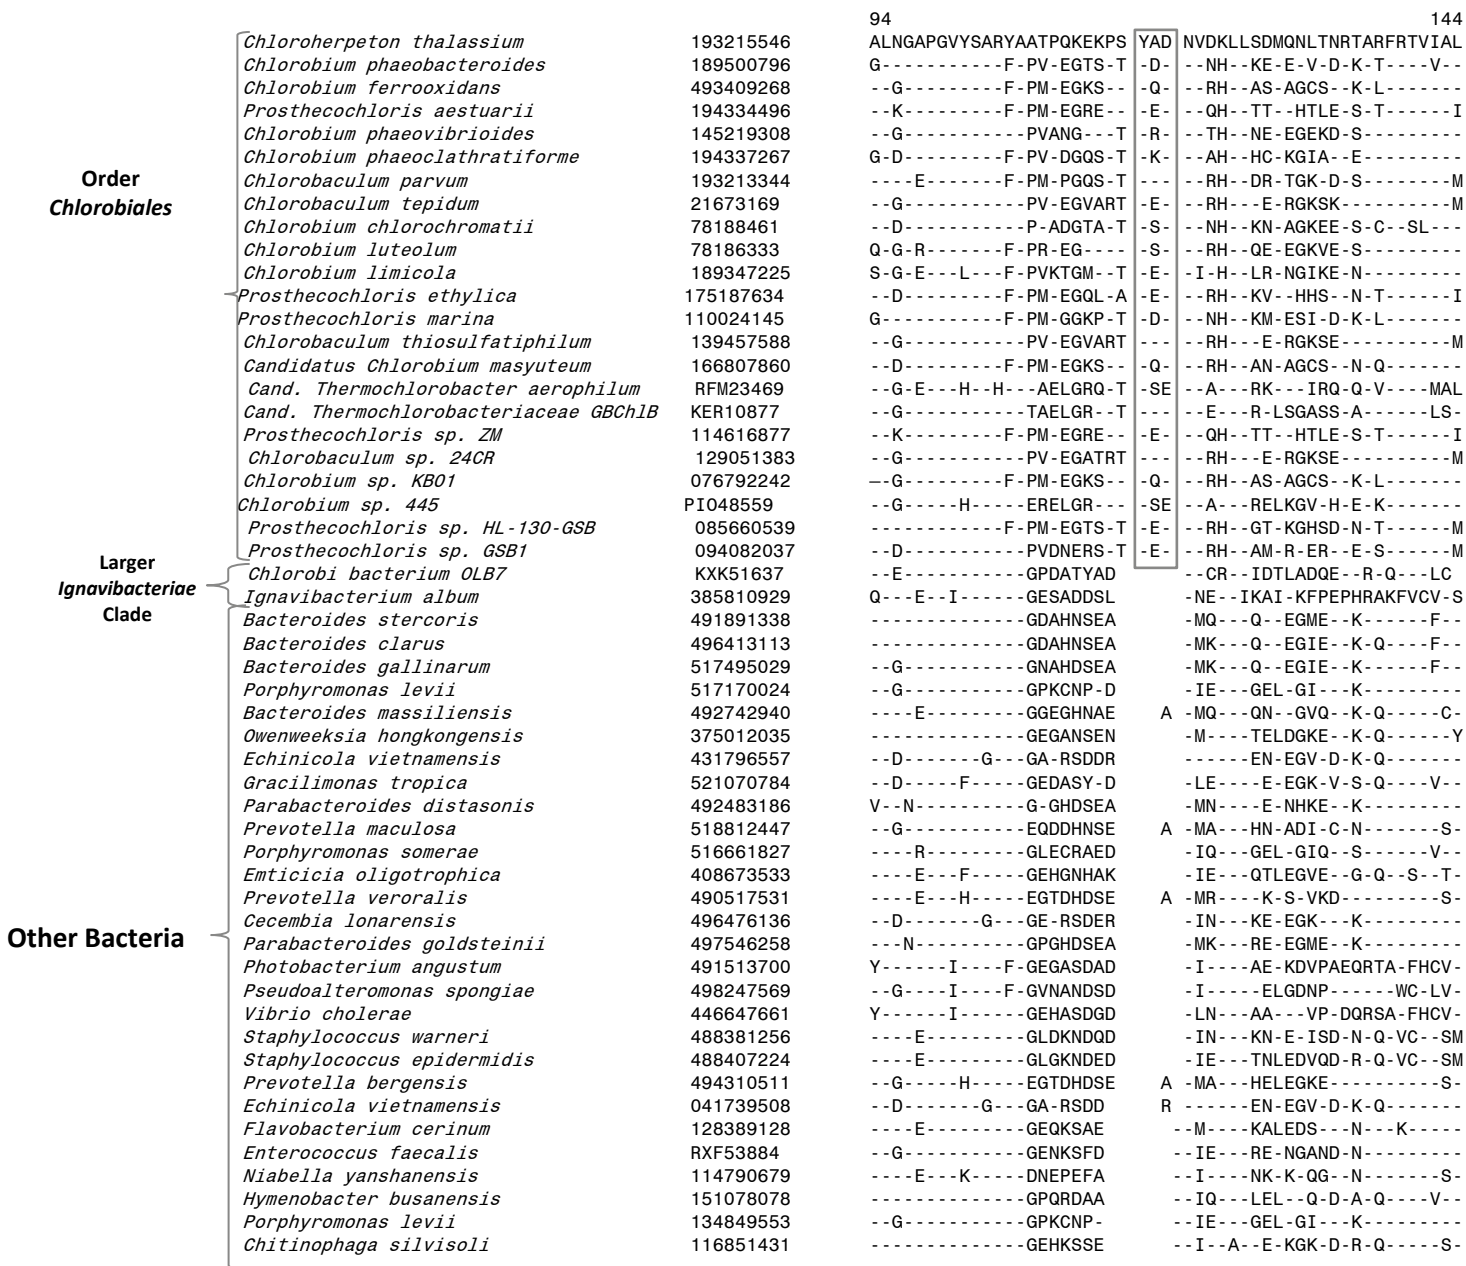

Figure S15

Partial sequence alignment of the protein deoxyribonucleotide triphosphate pyrophosphatase, showing a 3 aa insertion (boxed) that is found in all members belonging to the order *Chlorobiales*

|                                       |                                            |                                |                    |                  |                |               |
|---------------------------------------|--------------------------------------------|--------------------------------|--------------------|------------------|----------------|---------------|
|                                       |                                            |                                | 37                 |                  | 69             |               |
| Order<br>Chlorobiales                 | <i>Chlorobium limicola</i>                 | 189346136                      | LGDTMVLATVVSSKKTTP | P                | NQDYFPLQVEYREK |               |
|                                       | <i>Chlorobium phaeoclathratiforme</i>      | 194335788                      | Q-----I-----       | -                | -----          |               |
|                                       | <i>Chlorobium ferrooxidans</i>             | 493409513                      | -----              | -                | -----          |               |
|                                       | <i>Chlorobium chlorochromatii</i>          | 78189646                       | -----              | L                | G--F-----      |               |
|                                       | <i>Chlorobium phaeobacteroides</i>         | 119356388                      | -----TP--          | A                | -----          |               |
|                                       | <i>Chlorobium phaeovibrioides</i>          | 145220228                      | M-----I-----S      | -                | ---F-----      |               |
|                                       | <i>Chlorobaculum parvum</i>                | 193212209                      | -N-----TP--        | -                | S--F-----      |               |
|                                       | <i>Prosthecochloris aestuarii</i>          | 194333349                      | -N-----TP-S        | -                | --SF-----      |               |
|                                       | <i>Chlorobium luteolum</i>                 | 78187489                       | M-----I-----R--S   | V                | ---F-----      |               |
|                                       | <i>Chlorobaculum tepidum</i>               | 21674467                       | MN-----TP-S        | -                | ---F-----      |               |
|                                       | <i>Chlorobium phaeobacteroides</i>         | 189499525                      | M-----I-----RTP-S  | -                | ---F--M-----   |               |
|                                       | <i>Chloroherpeton thalassium</i>           | 193214790                      | -EE-----K-DA--     | A                | --NF-----      |               |
|                                       | <i>Chlorobaculum limnaeum</i>              | 2501894253                     | MN-----TRTP-S      | -                | ---F-----      |               |
|                                       | <i>Chlorobaculum thiosulfatiphilum</i>     | 139456275                      | -----T-TP--        | L                | ---F--M-----   |               |
|                                       | <i>Prosthecochloris marina</i>             | 110023770                      | M-----TP--         | -                | ---F-----      |               |
|                                       | <i>Cand. Thermochlorobacter aerophilum</i> | RFM23016                       | -AE-----ARKDD-V    | -                | G--FI----F--   |               |
|                                       | <i>Candidatus Chlorobium masyuteum</i>     | 166806995                      | -----              | -                | -----          |               |
|                                       | <i>Chlorobium sp. N1</i>                   | 131354161                      | M-----I-----R-A-S  | V                | ---F-----      |               |
|                                       | <i>Chlorobium sp. KB01</i>                 | 076791792                      | -----              | -                | -----          |               |
|                                       | <i>Chlorobaculum sp. 24CR</i>              | 129050239                      | -N-----P-S         | -                | ---F-----      |               |
|                                       | <i>Chlorobium sp. N1</i>                   | 131354161                      | M-----I-----R-A-S  | V                | ---F-----      |               |
|                                       | Larger<br>Ignavibacteriae<br>Clade         | <i>Prosthecochloris sp. ZM</i> | 114618152          | -N-----TP-S      | -              | --SF-----     |
| <i>Chlorobi bacterium OLB5</i>        |                                            | KXK53677                       | --I--C--GADE--K    | E                | GM-----F---    |               |
| <i>Chlorobi bacterium OLB4</i>        |                                            | KXK02521                       | V--NV--C-A-TA-EE-A | -                | G--F---S-D---  |               |
| <i>Chlorobi bacterium OLB7</i>        |                                            | KXK53815                       | -----VA-AAG---R    | E                | GI-FL----F---  |               |
| <i>Ignavibacterium album</i>          |                                            | 385809228                      | Y-----V-A-A-EDVKD  | D                | --F-----       |               |
| <i>Melioribacter roseus</i>           |                                            | 397690716                      | Y-----V-A-AGE VRD  | DI               | F---S-----     |               |
| <i>Marinimicrobia bacterium</i>       |                                            | 551209032                      | Y-----V-A-ANYFSKS  | E                | --F-----R      |               |
| <i>Kiloniella laminariae</i>          |                                            | 522079354                      | Y--V--C-A-GARDVK-  | G                | --F---T-N-Q--  |               |
| <i>Magnetococcus marinus</i>          |                                            | 117926996                      | Y--V--V-A-AETSMRA  | G                | --F---S-H-Q--  |               |
| <i>Acetobacter pasteurianus</i>       |                                            | 517918340                      | Y-E-V--C-A-GA-DVK- | G                | --F---T-N-Q--  |               |
| <i>Gluconobacter oxydans</i>          |                                            | 414341474                      | Y--V--C-A-GA-SVK-  | G                | --F---T-N-Q--  |               |
| <i>Oceanicaulis alexandrii</i>        |                                            | 550952395                      | Y-E-T---A-AQ-DVK-  | GM               | F---T-N-Q--    |               |
| <i>Gluconobacter frateurii</i>        |                                            | 565862949                      | Y--V--C-A-GA-SVK-  | G                | --F--MT-N-Q--  |               |
| <i>Gluconobacter thailandicus</i>     |                                            | 494494374                      | Y--V--C-A-GA-SVK-  | G                | --F--MT-N-Q--  |               |
| <i>Acetobacter pomorum</i>            |                                            | 493059067                      | Y-E-V--C-A-GA-EVK- | G                | --F---T-N-Q--  |               |
| <i>Saccharibacter floricola</i>       |                                            | 517809778                      | Y-E-V--C-A-GA-TVKA | G                | --F---T-N-Q--  |               |
| <i>Gluconacetobacter hansenii</i>     |                                            | 489712894                      | Y--V--C-A-GA-SVK-  | G                | --F---T-N-Q--  |               |
| <i>Gluconacetobacter diazotrophic</i> |                                            | 162147166                      | Y--V--C-A-GARSVK-  | G                | --F---T-N-Q--  |               |
| <i>Eliaorea tepidiphila</i>           |                                            | 517846087                      | Y--V-----GA-T-K-   | G                | --F---S-H-Q--  |               |
| <i>Bartonella schoenbuchensis</i>     |                                            | 498389360                      | Y-E-I-----A-NPK-   | D                | --F---T-N-Q--  |               |
| Other Bacteria                        |                                            | <i>alpha proteobacterium</i>   | 496820156          | W--VIIS-A-A---N- | DT             | F---T-N-Q--   |
|                                       |                                            | <i>Xanthobacteraceae</i>       | 517199826          | Y--T---A--A-SAK- | G              | --F---T-N-Q-- |
|                                       | <i>Bartonella bovis</i>                    | 498386729                      | Y-E-I-----A-NPK-   | D                | --F---T-N-Q--  |               |
|                                       | <i>Acetobacter tropicalis</i>              | 493605112                      | Y-E-V--C-A-GA-NVKA | G                | --F---T-N-Q--  |               |
|                                       | <i>Azospirillum lipoferum</i>              | 374293408                      | Y--T--C-A-AA-APK-  | GV               | F---T-N-Q--    |               |
|                                       | <i>Bartonella melophagi</i>                | 494740673                      | Y-E-I-----A-NPK-   | D                | --F---T-N-Q--  |               |
|                                       | <i>Azospirillum amazonense</i>             | 490393941                      | Y--V--C-A-GA-SVK-  | G                | --F---T-N-Q--  |               |
|                                       | <i>Agrobacterium tumefaciens</i>           | 523694192                      | Y-E-----A-SPK-     | G                | --F---T-N-Q--  |               |
|                                       | <i>Methylovorus glucosetrophus</i>         | 253997787                      | Y--V--V--GKTDVK-   | G                | --F---T-D-Q-R  |               |
|                                       | <i>Methylobacillus flagellatus</i>         | 91774427                       | Y--V--VS--GKREVKE  | G                | --F---T-D-Q--  |               |
|                                       | <i>Thiobacillus denitrificans</i>          | 74316711                       | MD----V--AKNEVK-   | G                | --F---T-D-Q--  |               |
|                                       | <i>Leeia oryzae</i>                        | 516890550                      | M--V--VS--AATNVK-  | G                | --F---T-D-Q-R  |               |
|                                       | <i>Selenomonas bovis</i>                   | 518371421                      | Y--V--V-ATA--EPRE  | GV               | F---T-D-E--    |               |
|                                       | <i>Mitsuokella multacida</i>               | 492423460                      | Y--V--V-ATA-AEPRE  | GV               | F---T-D-E--    |               |
|                                       | <i>Selenomonas flueggei</i>                | 493740328                      | Y--V--V-ATA--APRE  | GV               | F---T-D-E--    |               |
|                                       | <i>Caldithrix abyssi</i>                   | 493987866                      | Y-----V--ANDEMT    | QR               | FM--T-----     |               |
|                                       | <i>Rhodothermus marinus</i>                | 268316873                      | Q-----C-A-LADEPRE  | G                | SF---T-----    |               |
|                                       | <i>Enterococcus faecalis</i>               | 514895238                      | Y--V--SAA-A--EAKD  | T                | F---TIN-E--    |               |
|                                       | <i>Haemophilus influenzae</i>              | 270315521                      | MD--T-FV---AK-DVKE | G                | --F---T-N-Q-R  |               |
|                                       | <i>Pasteurella multocida</i>               | 401694220                      | MD--T-FV---AK-DVKE | G                | --F---T-N-Q-R  |               |
|                                       | <i>Megamonas funiformis</i>                | 547819988                      | Y-E-V--V-ATA-AEPRE | GV               | F---T-D-E--    |               |
|                                       | <i>Acidithiobacillus ferrivorans</i>       | 344200724                      | S--V--V-A-ARREMK-  | G                | --F---T-N-Q--  |               |
|                                       | <i>Stenotrophomonas maltophilia</i>        | 491555837                      | M--V--V-A-G--RAKD  | GL               | F---T-----R    |               |
|                                       | <i>Fangia hongkongensis</i>                | 517111971                      | A--V--V-A-AK-EVKD  | GA               | F---T-N-Q--    |               |
|                                       | <i>Roseiflexus castenholzii</i>            | 156743526                      | Y---L---A-A--EPRT  | DT               | F---T-D-E--    |               |
|                                       | <i>Thermovibrio ammonificans</i>           | 319789227                      | Q---I--V-A-M-DEPRE | DV               | F---L-----R    |               |

Figure S16

Partial sequence alignment of the protein polynucleotide phosphorylase/polyadenylase, showing a 1 aa insertion (boxed) that is found in all members belonging to the order *Chlorobiales*

|                              |                                            |            |                             |                                |
|------------------------------|--------------------------------------------|------------|-----------------------------|--------------------------------|
|                              |                                            | 264        |                             | 335                            |
|                              | <i>Chlorobaculum parvum</i>                | 193212209  | KEERSDRTKAIYKETIAKLEHFSS    | ITAEETIAANPEKALCQS             |
|                              | <i>Chloroherpeton thalassium</i>           | 193214790  | ---A-K-AEV-ADAS-AV-RKYKAE   | --D-IL-E-----IYLN              |
|                              | <i>Prosthecochloris aestuarii</i>          | 194333349  | ---AEK-AE---NAK-Q-QRYQQE    | --P-V---E-----YLN              |
|                              | <i>Chlorobium phaeobacteroides</i>         | 189499525  | ---AEK-T-V---SITEQI-GRYKNE  | ---D---D-S---YLN               |
|                              | <i>Chlorobium phaeoclathratiforme</i>      | 194335788  | ---A-Q-A---H-I-ES-I---KAT   | CSS--FSTD-A---IN               |
|                              | <i>Chlorobium luteolum</i>                 | 78187489   | --V-A-E-----S-VK-AI---AA    | FGP-AL--D-S---LN               |
|                              | <i>Chlorobium phaeovibrioides</i>          | 145220228  | ---AE---E-G--LKSAV---AA     | FSS-DL--D-S---TN               |
|                              | <i>Chlorobium chlorochromatii</i>          | 78189646   | ---AE--A---N--L-A---RAT     | --SS-AQ-DTA---LN               |
|                              | <i>Chlorobium ferrooxidans</i>             | 493409513  | --D-A-Q-AH--R---QAIV-K-K-S  | --SS-D---D-A---LN              |
| Order<br><i>Chlorobiales</i> | <i>Chlorobium limicola</i>                 | 189346136  | --D-AEQ-A---R-I-QS-V---KAA  | --SP---Q-D-S---LN              |
|                              | <i>Chlorobaculum tepidum</i>               | 21674467   | ---AEK---TQ--R---T--TDR     | VGPDQ-E-D-TS-F-LN              |
|                              | <i>Chlorobaculum limnaeum</i>              | 2501894253 | ---AEK---TQ-LR---T--TDR     | VGPDQ-E-D-SS-F-LN              |
|                              | <i>Chlorobaculum thiosulfatiphilum</i>     | 139456275  | ---AEK---TQ-LR---T--TDR     | VGPDQ-E-D-SS-F-LN              |
|                              | <i>Candidatus Chlorobium masyuteum</i>     | 166806995  | --D-A-Q-AH--R---QAIV-KFK--  | --SS-D---A---LN                |
|                              | <i>Cand. Thermochlorobacter aerophilum</i> | RFM23016   | --DV-AEK-----D--L-AV--KYKAE | --P-VL--S-----YLN              |
|                              | <i>Chlorobium sp. N1</i>                   | 131354161  | ---A-E-----G--VQQ-I---AA    | L---L--DSS---LN                |
|                              | <i>Chlorobium sp. KBO1</i>                 | 076791792  | --D-A-Q-AH--R---QAIV-KF---  | --SS-D---D-A---LN              |
|                              | <i>Prosthecochloris marina</i>             | 110023770  | ---AEK-SE---SVTQ-I-ARYKEE   | --S-DD---D-A---YLN             |
|                              | <i>Prosthecochloris sp. ZM</i>             | 114618152  | ---AEK-AE---NAK-Q-QRYQQE    | --P-V---E-----YLN              |
| <i>Ignavibacteriae</i>       | <i>Prosthecochloris sp. GSB1</i>           | 094083107  | --K-AEK-SE-TSSAFD---RYRNE   | --D-ALR-D-SR-IYLN              |
|                              | <i>Melioribacter roseus</i>                | 397690716  | ----QKN-ELEE-VVEQLA-K-PEQ   | -KV-KTIL--M--EL--QR--SEGL----  |
|                              | <i>Ignavibacterium album</i>               | 385809228  | ----AKN-ELAEFVKTSLA-KYPEQ   | -KV-A-LL--M--EL--QR--TEGI----  |
|                              | <i>Gordonia polyisoprenivorans</i>         | 378717577  | -Q--D-K-DELKEQILTQLA-Q-EGR  | -KE-GAAFRS-T--LV-QR--T-HF-I--- |
|                              | <i>Gordonia paraffinivorans</i>            | 493955506  | -Q--D-K-DELKADILEQLADK-EGR  | -KE-GGAYRALT--LV-QR--T-HF-I--- |
|                              | <i>Gordonia bronchialis</i>                | 262202098  | -Q--DEK-DELKDDIL-QLG-Q-EGR  | -KE-GAAYRS-T--LV-QR--T-HF-I--- |
|                              | <i>Gordonia araii</i>                      | 494531914  | -Q--DEK-DELKA-LLEQLGGQ-EGR  | -KE-GAAYRSLT--LV-QR--T-HF-I--- |
|                              | <i>Mycobacterium gilvum</i>                | 145224603  | --A-D---NE-KA-VVERLA-QYAGR  | -KE-GAAYRSLT--LV-QR--T-HF-I--- |
|                              | <i>Corynebacterium bovis</i>               | 497951292  | -Q--DEALA-NLD-VVETLAGQ-PDR  | -RE-RAAHN--T-TIV-DR--TEGF-I--- |
|                              | <i>Corynebacterium resistens</i>           | 336325779  | -Q--D-ALAENMQA-VDEL--E-PER  | -GE-RAAHN--T-QLV-QR--EEGF-I--- |
| Other Bacteria               | <i>Nocardia farcinica</i>                  | 54025857   | -Q--EEKIDE-KLAVLDRLA-Q-AGR  | -KELGAAFRS-T--LV-QR--T-GF-I--- |
|                              | <i>Mycobacterium liflandii</i>             | 443490346  | -A--NQ--EE-KA-VLERLADTYEGR  | -KE-GAAFRSLT--LV-QR-VT-HF-I--- |
|                              | <i>Rhodococcus coprophilus</i>             | 555592905  | -Q--D--DE-KV-VLEQIAPK-EGR   | -KE-GAAFRSLT--LV-QR--R-QF-I--- |
|                              | <i>Gordonia terrae</i>                     | 490121385  | -Q--D-K-DELKADIL-QLG-Q-EGR  | -KE-GGAYRSLT--LV-QR--T-HF-I--- |
|                              | <i>Gordonia soli</i>                       | 494899217  | -Q--DSK-DELKADVLEQLAGQ-EGR  | -KE-GAAYRSLT--LV-KR--T-HF-I--- |
|                              | <i>Cellulomonas fimi</i>                   | 332670053  | -QT-EN-LDE-KA-VVGQLA-Q-EGR  | -KELSAAYRS-Q--LI-QR--T-GF-I--- |
|                              | <i>Rhodococcus ruber</i>                   | 490033249  | -Q--DE--DE-KV-VLEQVAPN-EGR  | -KE-GAAFRSLT--LV-QR--R-QF-I--- |
|                              | <i>Carboxydothermus hydrogenoformans</i>   | 78044607   | -Q--DEYLENLK--LTT-F--TYPEE  | -LT-KGILDSIQ-EIV-QK--KEGI-I--- |
|                              | <i>Clostridium papyrosolvens</i>           | 490755727  | -QD-DAKVSLETE--Q-ALA-QYPEM  | -NK-KDA-YKL---V-EY--KEG--V---  |
|                              | <i>Candidatus Latescibacter</i>            | 551163936  | -T--NATLAT-FEKA-E-FE-KYPES  | -TLLKNAFD-IVREI--S---QE-V-I--- |
|                              | <i>Alicyclobacillus acidoterrestris</i>    | 544884231  | -LA-EAAISEVNE-VQEHFA-Q-PEM  | -ND-A-VL--IL-EEV-SA--NEGI-P--- |
|                              | <i>Alicyclobacillus hesperidum</i>         | 493492321  | -LA-EEALSNLNE-VQ-HFA-A-PER  | -AE-A-IM--IL-EEV-RA--QEGI-P--- |
|                              | <i>Kyrpidia tusciae</i>                    | 295696164  | -LA-E-AIR-VEE--QEHFA-Q-PEG  | AAD-A-VL--IL-EEV-SA--NEGM-P--- |

Figure S17

Partial sequence alignment of the protein polynucleotide phosphorylase/polyadenylase, showing a 17 aa insertion (boxed) that is found in all members belonging to the order *Chlorobiales*

|  |                                        |              |                       |                     |
|--|----------------------------------------|--------------|-----------------------|---------------------|
|  |                                        | 119          |                       | 164                 |
|  | <i>Chlorobium phaeobacteroides</i>     | 500067752    | DLKPPSSGVCERNCPENITLA | LHAGKKL             |
|  | <i>Chlorobium limicola</i>             | 189347255    | ---A-----NK-N-Q--E--  | MRS--AE             |
|  | <i>Chlorobium chlorochromatii</i>      | 78188483     | ---A-----A-K-N-A--R-- | -E-APEE             |
|  | <i>Chlorobium phaeoclathratiforme</i>  | 194337298    | -----DQ-N-----E--     | -A-VLPH             |
|  | <i>Chlorobium ferrooxidans</i>         | 493409287    | -----T--SDK-N---A--   | -KQKDHA             |
|  | <i>Chlorobium phaeovibrioides</i>      | 145219296    | -----ESGK--M-----     | FK---E              |
|  | <i>Chlorobium phaeobacteroides</i>     | 189500807    | ---A---ESG-I-TS--E--  | VS-AEP-             |
|  | <i>Chlorobium luteolum</i>             | 78186318     | -----RDKE--M---DI-    | -N--EGE             |
|  | <i>Chloroherpeton thalassium</i>       | 193215257    | -I-T---EMS-W--YR-LE-S | IAEA-SG             |
|  | <i>Prosthecochloris aestuarii</i>      | 194334507    | -----SSSN-HET--RI-    | -K-PPAE             |
|  | <i>Prosthecochloris ethylica</i>       | 175187643    | -I-----SQN--TQ--L--   | -Q-PPEQ             |
|  | <i>Prosthecochloris marina</i>         | 110023272    | ---A---ES-K--LK--EYV  | IASSVLQ             |
|  | <i>Chlorobaculum thiosulfatiphilum</i> | 139457424    | -I-A-----AAE--AT-FA-- | -DT                 |
|  | <i>Chlorobaculum parvum</i>            | 193213357    | -I-T----A-Q--MD--P--  | -AS                 |
|  | <i>Chlorobaculum tepidum</i>           | 21673157     | -I-A-----M-H--AA-F--  | -NE                 |
|  | <i>Candidatus Chlorobium masyuteum</i> | 166807843    | -----T--SDK-N---A--   | -KQKDHA             |
|  | <i>Chlorobium</i> sp. N1               | TCDA7685     | -----CA-E--M--VE--    | -A-VTAE             |
|  | <i>Chlorobium</i> sp. KB01             | 076792264    | -----T--SDK-N---A--   | -KQKDHA             |
|  | <i>Ignavibacterium album</i>           | 385808941    | ---C---MMKK-LYD---YFL | KP-D-V-F-IGT-----   |
|  | <i>Melioribacter roseus</i>            | 397689554    | ---C---KMEKK-RY---EFL | KPGD-V-F-IGD-N--E-  |
|  | <i>Uliginosibacterium gangwonense</i>  | 517434067    | ---A-G--EVSK-RL---P-L | RASD-L--IISDEQ--L-  |
|  | <i>Methylobacter mobilis</i>           | 253997441    | -V-T-D--ELKN-LWG-LAHL | KKAD-V-F-LC--A--E-  |
|  | <i>Sulfuricella denitrificans</i>      | 543962518    | -I-T-G--EA-K-RWK-LE-L | T P-D -V-F-LCGE--Q- |
|  | <i>Nitrosospora multiformis</i>        | 82703824     | ---T-G--EV-K-LWS-VQYL | TSHD-V-F-LCDED--R-  |
|  | <i>Methylovorus glucosetrophus</i>     | 254000097    | -I-T-G--EL-K-LWG-LAHL | KAQD-V-F-LCDHA--L-  |
|  | <i>Thauera linaloolentis</i>           | 490464234    | ---A-G--EV---LYA--A-L | TPHD-I---L-GEA--E-  |
|  | <i>Thauera terpenica</i>               | 544831712    | ---A-G--EL---L-A--P-L | RAQD-V-M-L-DEA---   |
|  | <i>Azoarcus toluclasticus</i>          | 517818178    | ---A-G--EVA--RW--LAHL | AAHD-I---L-DEA--A-  |
|  | <i>Methylobacter versatilis</i>        | 297539673    | -V-T-D--ELKN-VWS-LDHL | KSSD-V-F-LC----Q-   |
|  | <i>Methylobacillus flagellatus</i>     | 91776688     | -I-T-D--EVAK-HWD-LSRL | KPND-V---LC--A--E-  |
|  | <i>Sideroxydans lithotrophicus</i>     | 291612993    | -I-T-G--EVQK-LWG-LQHL | GRHD-I-F-LCGEA--Q-  |
|  | <i>Thiobacillus thioparus</i>          | 517331384    | -I---E--EEA--RW--VAHL | TSRD-I-F-L-N-A--E-  |
|  | <i>Dechlorosoma suillum</i>            | 372487166    | ---A-G--EV---LWS-LEYL | TPHD-L-L-L-D-A----  |
|  | <i>Aromatoleum aromaticum</i>          | 56476931     | ---A-G--EVA--RWD-LARL | NERD-V---L-D-L--E-  |
|  | <i>Dechloromonas aromatica</i>         | 71909659     | ---A-D-AESA--LW--L-VL | TPRD-I---I---G-E-   |
|  | <i>Thauera phenylacetica</i>           | 490513686    | ---A-G--ELA--RL--LA-L | NARD-L-F-L-DAA--A-  |
|  | <i>Xanthomonas campestris</i>          | 498060970    | -I-T-A--EEA--RW--LP-L | TARDQI-F-IC--A--E-  |
|  | <i>Stenotrophomonas maltophilia</i>    | 344208553    | -I-T-G-AEAA--RL--LP-L | TARDQI-F-ICN-----   |
|  | <i>Acidithiobacillus ferrooxidans</i>  | MBU2824517   | ---S-D--E---LW--LP-L  | NPQDQI-F-LC--A----  |
|  | <i>Fluviibacter phosphoraccumulans</i> | WP_162050708 | ---A-G--ETDK-LLS--PDL | R--D-V---I---A----  |
|  | <i>Sulfuritalea hydrogenivorans</i>    | WP_041100787 | ---A-G--EEAK--W---G-L | TAHD-L-F-L-----     |
|  | <i>Azonexus hydrophilus</i>            | WP_205203486 | ---A-A--E---LWS-LRHL  | KAGD-I--II-D-A----  |
|  | <i>Acidithiobacillus ferriphilus</i>   | MBW9249360   | ---S-D--E---LW--LP-L  | NPQDQI-F-LC--A----  |
|  | <i>Sulfuritalea hydrogenivorans</i>    | BA031070     | ---A-G--EEAK--W---G-L | TAHD-L-F-L-----     |
|  | <i>Corallococcus coralloides</i>       | AFE10952     | -M-T----E-D--DYR-L-SM | NAND-L---IG--V--E-  |
|  | <i>Xanthomonas gardneri</i>            | 493497825    | -I-T-A--EEQ--RW--LP-L | TARDQI-F-IC--A--E-  |
|  | <i>Xanthomonas vasicola</i>            | 515684535    | -I-T-A--EEA--RW--LP-L | TARDQI-F-IC--A--E-  |
|  | <i>Dyella ginsengisoli</i>             | 516030927    | ---A-D--ESA--LWA-LAHL | LPHDQV---I---A--E-  |
|  | <i>Xanthomonas axonopodis</i>          | 346725939    | -I-T-A--EEA--RW--LP-L | TARDQI-F-IC--A--E-  |
|  | <i>Rhodanobacter spathiphylli</i>      | 495083596    | ---A-G--ESA--LWS-LDHL | LPHDQI---I-----E-   |
|  | <i>Stigmatella aurantiaca</i>          | 488692977    | -M-T----ESD--DVR-FSSM | NARD-M-F-IG-----E-  |
|  | <i>Myxococcus stipitatus</i>           | 442317511    | -M-T----ESS--DLR-FASM | NARD-L-F-IG-----E-  |
|  | <i>Corallococcus coralloides</i>       | 383452467    | -M-T----E-D--DYR-L-SM | NAND-L---IG--V--E-  |
|  | <i>Desulfobacca acetoxidans</i>        | 328953829    | ---C-G--MAQH-YLK-LDYL | TEKD-L-F--SN-R-F--  |

Figure S18

Partial sequence alignment of the protein 7-carboxy-7-deazaguanine synthase QueE, showing a 3-7 aa insertion (boxed) that is found in all members belonging to the order *Chlorobiales*. While other *Chlorobiales* species contain a 7 aa insertion, *Chlorobaculum* species have a 3 aa insert in this position

|                                      |                                              |                                      |                          |                           |                      |
|--------------------------------------|----------------------------------------------|--------------------------------------|--------------------------|---------------------------|----------------------|
|                                      |                                              |                                      | 47                       | 93                        |                      |
| Order<br>Chlorobiales                | <i>Chloroherpeton thalassium</i>             | 193213861                            | RGVGKTTAARILAKGLNCEKILKD | EA YRETVSE PCGECESCRDFDAG |                      |
|                                      | <i>Pelodictyon phaeoclathratiforme</i>       | 194336682                            | -----VF--A--Q-MME-       | AE -LQQ-T- -----          |                      |
|                                      | <i>Chlorobium ferrooxidans</i>               | 493410721                            | -----VF--AV--QRMME-      | PV -LQE-T- -----S-        |                      |
|                                      | <i>Chlorobium chlorochromatii</i>            | 78188902                             | -----F-RA--Q-LID-        | AD -LQQ-T- -----          |                      |
|                                      | <i>Prosthecochloris aestuarii</i>            | 194334277                            | -----VF--AV--Q-MID-      | PV --QE-T- -----L----     |                      |
|                                      | <i>Chlorobaculum parvum</i>                  | 193212992                            | -----VF--AV--QRMIE-      | PK -LKE-T- -----          |                      |
|                                      | <i>Chlorobium limicola</i>                   | 059138195                            | -----VF--AV--QR-ID-      | PE -LRK-T- -----          |                      |
|                                      | <i>Chlorobium phaeobacteroides</i>           | 119357453                            | -----VF--AV--I-MTE-      | KD -LQH-T- -----E--       |                      |
|                                      | <i>Chlorobium luteolum</i>                   | 78187181                             | -----VF--A--QRMID-       | AD WLRD-T- -----ET-       |                      |
|                                      | <i>Chlorobium phaeovibrioides</i>            | 145219538                            | -----VF--A--QRMIE-       | AD WLRD-T- -----          |                      |
|                                      | <i>Chlorobium tepidum</i>                    | 21674147                             | -----VF--AV--QRMID-      | PQ -LKE-T- ---V-----      |                      |
|                                      | <i>Prosthecochloris marina</i>               | 110023130                            | -----VF--AV--SRMIE-      | PV -LKE-T- -----EQ-       |                      |
|                                      | <i>Chlorobaculum thiosulfatiphilum</i>       | 139457273                            | -----VF--AV--RMID-       | PK -LKE-T- -----          |                      |
|                                      | <i>Prosthecochloris ethylica</i>             | 175186743                            | -----F--AV--HRMIE-       | -T --QE-T- -----E--       |                      |
|                                      | <i>Chlorobaculum limnaeum</i>                | 069809131                            | -----VF--AV--RMID-       | PK -LKE-T- -----          |                      |
|                                      | <i>Candidatus Thermochlorobacteri GBCh1B</i> | KERO9939                             | -----S-----A-----V-T-    | D -RD-A- ---V-D-----      |                      |
|                                      | <i>Chlorobaculum sp. 24CR</i>                | 129051538                            | -----VF--AV--RMIE-       | PK -LKE-T- -----          |                      |
|                                      | <i>Chlorobium sp. 445</i>                    | PI047289                             | -----T-----A---R--T-     | -- --HE-A- ---M-----      |                      |
|                                      | <i>Chlorobium sp. N1</i>                     | 131353650                            | -----VF--A--QRMIE-       | PD WLQN-T- -----S-        |                      |
|                                      | <i>Prosthecochloris sp. HL-130-GSB</i>       | 085659383                            | -----F--AV--RMIA-        | -T --HD-T- -----S-        |                      |
|                                      | <i>Prosthecochloris sp. ZM_2</i>             | 114608329                            | -----F--AV--HRMIE-       | -T --QE-T- -----E--       |                      |
|                                      | <i>Prosthecochloris sp. GSB1</i>             | 094082258                            | -----VF--AV--SRMIE-      | PV -LKD-T- -----S-        |                      |
|                                      | Ignavibacteriae                              | <i>Ignavibacterium album</i>         | 385809646                | -----T-----A---LQPVD      | F-- --NK-DM--AINEM   |
|                                      |                                              | <i>Melioribacter roseus</i>          | 397690783                | -----T-----V---LNP-D      | G-- --N---M-KS-HNS   |
| <i>Cesiribacter andamanensis</i>     |                                              | 496488478                            | -----C-----TI--QNL-S-    | T-- --N---KS-N-S          |                      |
| <i>Odoribacter splanchnicus</i>      |                                              | 325279833                            | -----C---F--TI--LNLQPN   | A-- --N---KA-N--          |                      |
| <i>Odoribacter laneus</i>            |                                              | 496427542                            | -----C---F--TI--QNLQPN   | A-- --N---KA-NT-          |                      |
| <i>Sphingobacterium paucimobilis</i> |                                              | 544633475                            | -----C-----TI---N-SSS    | T-- --N---KS-AG-          |                      |
| <i>Flexibacter litoralis</i>         |                                              | 392399356                            | -----CS-----TI--LN-TPE   | T-- --D--S--KS-N--        |                      |
| <i>Rhodothermus marinus</i>          |                                              | 268318150                            | -----L-----AI--QTP-EE    | --DHA-- --RR--A-VA-EE-    |                      |
| <i>Nafulsella turpanensis</i>        |                                              | 516343857                            | -----C-----TI--QNLQAE    | GGP-DI- --N-----KS-NTS    |                      |
| <i>Butyrlicimonas synergistica</i>   |                                              | 517147223                            | -----C---F--TI--MNLQPN   | A-- --N---KA-ND-          |                      |
| <i>Salinibacter ruber</i>            |                                              | 294508590                            | -----AI-----TPREE        | --DGA-- --C--D--ES-E--    |                      |
| <i>Leadbetterella byssophila</i>     |                                              | 312129467                            | -----C-----TI--QNVSA-    | T-- --N--T--KN-AQN        |                      |
| <i>Pontibacter roseus</i>            |                                              | 517290706                            | -----C-----TI--QN-TPE    | V-- --A-N-----S-NSN       |                      |
| <i>Algoriphagus machipongonensis</i> |                                              | 495478098                            | -----C-----TI--NRQD-     | Q-- --A-----VS-KNN        |                      |
| <i>Segetibacter koreensis</i>        |                                              | 517442100                            | -----C-----TI---N-SP-    | G-- --A-NH-H--VS-NE-      |                      |
| <i>Chitinophaga pinensis</i>         |                                              | 256426033                            | -----C-----TI--NLQP-     | G-- --A-NQ-H--TS-NE-      |                      |
| <i>Runella slithyformis</i>          |                                              | 338214761                            | -----N-----TI--QSLTDE    | V-- -----VA-QNN           |                      |
| <i>Emticicia oligotrophica</i>       |                                              | 408674356                            | -----C-----TI--QNLTE-    | IS --N-----KS-NNN         |                      |
| <i>Cytophaga aurantiaca</i>          |                                              | 517153747                            | -----N-----TI--TN-TA-    | T-- --A-DQ---KS-NNN       |                      |
| <i>Cytophaga hutchinsonii</i>        |                                              | 110637639                            | -----N-----TI--TN-TA-    | I-- --A-D-----KS-NNN      |                      |
| <i>Niabella aurantiaca</i>           |                                              | 517460269                            | -----C-----TI--HSTA-     | G-- --A-N--P--IS-NQ-      |                      |
| Other Bacteria                       |                                              | <i>Dyadobacter fermentans</i>        | 255038674                | -----C-----TI--QNLGD-     | V-- --A-----VS-QNN   |
|                                      |                                              | <i>Arcticibacter svalbardensis</i>   | 510820038                | -----C-----TI--NLSAE      | T-- --A--V-P--A-LN-  |
|                                      |                                              | <i>Sphingobacterium spiritivorum</i> | 489092257                | -----C-----TI--H-TSE      | V-- --A--V-D--KS-QN- |
|                                      | <i>Cecembia lonarensis</i>                   | 496476319                            | -----C-----TI--QNLTA-    | F-- --A-N--D--KA-NNN      |                      |
|                                      | <i>Pedobacter heparinus</i>                  | 255530648                            | -----C-----TI--TSLTAE    | Q-- --A--T---VS-QT-       |                      |
|                                      | <i>Solitalea canadensis</i>                  | 387789585                            | -----C--V--TI--QTPTA-    | F-- --A-----LS-KH-        |                      |
|                                      | <i>Nitritalea halalkaliphila</i>             | 496346710                            | -----C-----TI--HLTE-     | F-- --A-NQ-D--KA-NQN      |                      |
|                                      | <i>Dyadobacter beijingensis</i>              | 518785034                            | -----C-----TI--QNLGD-    | V-- --A-----VS-QNN        |                      |
|                                      | <i>Niabella soli</i>                         | 495860953                            | -----C-----TI--HATPE     | G-- --A-N--N--IS-NL-      |                      |
|                                      | <i>Alistipes senegalensis</i>                | 517981349                            | -----C---F--AI--LAPNGA   | -- --A-N-----S-NE-        |                      |
|                                      | <i>Indibacter alkaliphilus</i>               | 496326470                            | -----C-----TI--HLTA-     | H-- --A-NK-D--LA-NNN      |                      |
|                                      | <i>Saprospira grandis</i>                    | 488734264                            | -----C-----L---NPTS-     | T-- --D--P--TA-REN        |                      |
|                                      | <i>Porphyromonas gulae</i>                   | 517795486                            | -----SC---F-RAI--LER-P-  | G-- --A--R---KA--EQ       |                      |
|                                      | <i>Prevotella multisaccharivorax</i>         | 494849999                            | -----C---F--AI--NPTQ-    | G-- --A-N-----A-NE-       |                      |
|                                      | <i>Bacteriovorax marinus</i>                 | 374286880                            | --I---SV---F--AIR--SR-E- | -N --A--T---Q---SA        |                      |
|                                      | <i>Alistipes finegoldii</i>                  | 547311906                            | -----C---F--AI--LSPNGA   | -- --A-N-----S-NE-        |                      |
|                                      | <i>Rudaea cellulosilytica</i>                | 517804372                            | -----I---F--S---GQSS     | D -----ST---I---          |                      |
|                                      | <i>Xanthomonas sacchari</i>                  | 498026990                            | -----I---F--S---QGTS     | D ---Q-AA-L-I---          |                      |
|                                      | <i>Arenimonas oryzae</i>                     | 551348563                            | -----I---F--S---RGTA     | -- --NA-V-I---            |                      |
|                                      | <i>Stenotrophomonas maltophilia</i>          | 544778658                            | -----I---F--S---QGTS     | D ---Q-AA-L-I---          |                      |
|                                      | <i>Xanthomonas translucens</i>               | 489564082                            | -----I---F--S---QGTS     | D ---Q-PA-L-I---          |                      |

Figure S19

Partial sequence alignment of the protein DNA polymerase III subunits gamma and tau, showing a 2 aa insertion (boxed) that is found in all members belonging to the order *Chlorobiales*

|                                    |                                              |           |                    |       |                              |
|------------------------------------|----------------------------------------------|-----------|--------------------|-------|------------------------------|
| Order<br>Chlorobiales              | <i>Chlorobaculum parvum</i>                  | 193212992 | GSMRDAQSILDQVIAFA  | IDSE  | GERAIRYDKVSDLLSYIDDEHFMVTD   |
|                                    | <i>Chlorobaculum tepidum</i>                 | 21674147  | -----              | ----- | E-----                       |
|                                    | <i>Chlorobium luteolum</i>                   | 78187181  | -----S             | AQ-G  | -DG--S-QN-AE--N---QL-A---    |
|                                    | <i>Chlorobium phaeobacteroides</i>           | 189499967 | -----              | VEQD  | D--S---E--AE--N---D---A---   |
|                                    | <i>Chlorobium ferrooxidans</i>               | 493410721 | -----T             | AEND  | H-GS-S-QS-AE--N---M-G---     |
|                                    | <i>Chlorobium phaeoclathratiforme</i>        | 194336682 | -----S             | AEND  | HTGS-T-SG-AE--N---L-E---     |
|                                    | <i>Chlorobium chlorochromatii</i>            | 78188902  | -----S             | SENA  | L-GS-T-RG-A--N---DTM-A---    |
|                                    | <i>Chlorobaculum limnaeum</i>                | 069809131 | -----              | L-N   | -----E-----DH-----           |
|                                    | <i>Chlorobium limicola</i>                   | 059138195 | -----S             | F-R   | SDG--S-A-AE--N---D---A---    |
|                                    | <i>Prosthecochloris aestuarii</i>            | 194334277 | -----S             | VGND  | A-KV-A-QG-AE--N---DQ--D-S--  |
|                                    | <i>Chlorobaculum thiosulfatiphilum</i>       | 139457273 | -----              | L---  | ---V---E-----E-----          |
|                                    | <i>Prosthecochloris marina</i>               | 110023130 | -----              | -EQD  | E--S-H---AE--N---DQ--E-A-    |
|                                    | <i>Chlorobium phaeovibrioides</i>            | 145219538 | -----S             | --    | SGEG-S-QG-RE--N---QL-A---    |
|                                    | <i>Chloroherpeton thalassium</i>             | 193213861 | -A-----L-----S-F   | L-T   | ENEK-E-TN-AA--GD-----A--S    |
|                                    | <i>Prosthecochloris ethylica</i>             | 175186743 | -----              | -GEN  | H-EG-S-QR-A--N-V-----A---    |
|                                    | <i>Cand. Thermochlorobacter aerophilum</i>   | RFM23307  | -A-----L-----C     | TE-   | -KGK-E-AA-A--NI---R--D-S--   |
|                                    | <i>Chlorobaculum sp. 24CR</i>                | 129051538 | -----              | L---  | ---V---E--A-----E-----       |
|                                    | <i>Prosthecochloris sp. GSB1</i>             | 094082258 | -----              | -ER-  | -D-T---ET-AE--N---DH--A---   |
|                                    | <i>Prosthecochloris sp. HL-130-GSB</i>       | 085659383 | -----S             | --    | RT-VS-EN--G--N-----A-S--     |
|                                    | <i>Prosthecochloris sp. ZM_2</i>             | 114608329 | -----S             | -GEN  | H-EG-S-QR-A--N-V-----A---    |
|                                    | <i>Chlorobium sp. N1</i>                     | 131353650 | -----T             | AEGD  | --A--S-RG-A--N---QL-Q---     |
|                                    | <i>Candidatus Thermochlorobacteri GBCh1B</i> | KERO9939  | -A-----L-----S-C   | TQD   | -V-D-N-AA--E--NV---K--D---   |
|                                    | <i>Chlorobium sp. 445</i>                    | PI047289  | -A-----L-----C     | TEN   | -KGK-E-VA--E--NV--E-RL-D-S-- |
| Larger<br>Ignavibacteriae<br>Clade | <i>Chlorobi bacterium OLB7</i>               | KXK57074  | -----F---T--C      |       | GTT-T-HQAN-A-NL--QD-L-R---   |
|                                    | <i>Ignavibacterium album</i>                 | 385809646 | -G-----YF-----C    |       | GENVDSET--KI-NL--E-TY-NIS--  |
|                                    | <i>Melioribacter roseus</i>                  | 397690783 | -AL---E-LF--I-SYS  |       | GKKVNSEET-QM-NL--QDIY-RIS--  |
|                                    | <i>Rhodothermus marinus</i>                  | 345304445 | -AL---L-AF--AVSLC  |       | GTTL--AELAQA-GVV-LDLY-A---H  |
|                                    | <i>Parabacteroides distasonis</i>            | 150008698 | -G---L--F--VS-T    |       | NGN-T-QA-I-N-NVL-Y-YY-RL---  |
|                                    | <i>Parabacteroides johnsonii</i>             | 495429919 | -G---L--F--VS-T    |       | NGN-T-QA-I-N-NVL-Y-YY-RL---  |
|                                    | <i>Fibrisoma limi</i>                        | 496578583 | -GL---L-MF-LNVT-S  |       | AD-T---KE-L-N-HIL-YDYY-KL--Q |
|                                    | <i>Parabacteroides merdae</i>                | 547920597 | -G---L--F--VS-T    |       | NGN-T-QA-I-N-NVL-Y-YY-RL---  |
|                                    | <i>Capnocytophaga gingivalis</i>             | 488745336 | -A---L--F-R-VS-C   |       | GKT-TRQA--EI-NVL-YDYY-K--L   |
|                                    | <i>Spirosoma luteum</i>                      | 517446762 | -GL---L-MF-LNVT--  |       | AD-V---KE-L-N-HIL-YDYY-KL--L |
| Other Bacteria                     | <i>Thermophagus xiamenensis</i>              | 498213992 | -A---L--F--IV--S   |       | GKR-S-QQ-IEN-NVL-YDYY-KLV--  |
|                                    | <i>Spirosoma linguale</i>                    | 284034966 | -GL---L-MF-LNVT--  |       | AD-I---KE-L-N-HIL-YDYY-KL--L |
|                                    | <i>Clostridium botulinum</i>                 | 153941061 | -A---L-----STG     |       | DGKVE--Q-L-M-GLVTN-NLLRI--S  |
|                                    | <i>Clostridium sporogenes</i>                | 489578394 | -A---L-----STG     |       | DGKVE--Q-L-M-GLVTN-NLLII-NS  |
|                                    | <i>Candidatus Symbiobacter</i>               | 550990475 | --L---L-LT--A---G  |       | GG-VQTPS-REM-GCV-RS-VYALL--  |
|                                    | <i>Verminephrobacter eiseniae</i>            | 121607506 | -----L-LT--A--G    |       | SGQLQEAA-RQM-GAV-RSYV-RLI--  |
|                                    | <i>Aromatoleum aromaticum</i>                | 56476074  | -----L-L--A--HG    |       | SGRVEEEQ--HM-GTVG-D-LYA-L--  |
|                                    | <i>Nitrosospira multiformis</i>              | 82702979  | -----L-----A--G    |       | -GK-EEAG-R-M-GAV-QGYL-DLLE-  |
|                                    | <i>Cupriavidus taiwanensis</i>               | 516633018 | -----L-LT--A--YS   |       | AGQVSEEA-RGM-GA--QGYLVQLL--  |
|                                    | <i>Methylibium petroleiphilum</i>            | 124267720 | -----L-LT--A--G    |       | AGTLQEAG-RQMIGAVGRS-VYALI--  |
|                                    | <i>Cupriavidus necator</i>                   | 339326421 | -----L-LT--A--YS   |       | AGQVSE-A-RGM-GA--QGYLVQLL--  |
|                                    | <i>Ralstonia pickettii</i>                   | 549447903 | -----L-LT--A--YS   |       | AGQVSEEA-RGM-GA--QGYLVQLL--  |
|                                    | <i>Caldithrix abyssi</i>                     | 493984161 | -----S-----L-S-S   |       | GNE-KFED-AKA-GV-HQDE--HL--Y  |
|                                    | <i>Geobacter metallireducens</i>             | 404498270 | -----SL-V-----L--C |       | GDQV-DEE-VS--GVV-RRLLLDA-A-  |
|                                    | <i>Desulfococcus multivorans</i>             | 527022898 | -----L-L---MTCT    |       | -GE-THGE-LN--GAA-R-VL-RI-A-  |
|                                    | <i>Geobacter sulfurreducens</i>              | 39995205  | -----SL-V-----L--C |       | GETVND-D-VS--GVV-RRLLLEASA-  |
|                                    | <i>Bdellovibrio bacteriovorus</i>            | 426405587 | -----S--L-----T--  |       | NGPLTRAS-VEI-GLT-RALL-ETLN-  |
|                                    | <i>Mobiluncus curtisii</i>                   | 490107874 | --V--SL-----L--GE  |       | A-PKLH--RAVS--G-T-SGLLGGMV-- |
|                                    | <i>Hyphomicrobium denitrificans</i>          | 488578002 | --V--GL-----A--MG  |       | -GHVTAMS-R-M-GLA-RARI-DLAE-  |

Figure S20

Partial sequence alignment of the protein DNA polymerase III subunits gamma and tau, showing a 4 aa insertion (boxed) that is found in all members belonging to the order *Chlorobiales*

|                                           |                                         |            | 146                    | 199                                   |
|-------------------------------------------|-----------------------------------------|------------|------------------------|---------------------------------------|
| Order<br><i>Chlorobiales</i>              | <i>Chlorobaculum tepidum</i>            | 21673125   | LKIFLIADPAERAKRRHAEL   | LLKA G GAAVPSVEALEEEEIKQRDRDDEQRTHAPL |
|                                           | <i>Prosthecochloris vibrioformis</i>    | 139626144  | -----V-----R--Y----    | ES-H - AEGL--PDE--Q--I-----RG-----    |
|                                           | <i>Chlorobaculum parvum</i>             | 193213387  | -----V-----Y----       | -----DE-----                          |
|                                           | <i>Chlorobium ferrooxidans</i>          | 493410280  | -----V--AR-----Y----   | --S PE--EL-DLDL--D-----EE-TL-E----    |
|                                           | <i>Chlorobium chlorochromatii</i>       | 78188549   | -----NAR-----Y----     | -A-L PA-STM-TL-E--A--R--L--T-Q----    |
|                                           | <i>Chlorobium phaeoclathratiforme</i>   | 194335600  | ---Y-V--AR-----Y----   | TA-S AE-VEL-DLDS--Q--TK-----AE-E----  |
|                                           | <i>Chlorobium limicola</i>              | 189345891  | -----AR-----Y----      | AA-G AS-SEL-D-AI--Q--VE---A-AR--L---- |
|                                           | <i>Chlorobium phaeovibrioides</i>       | 145220319  | -----V--AR-----L----   | QA-S PE-FG--DL-T--A--VE---A-AL-E----  |
|                                           | <i>Chlorobium phaeobacteroides</i>      | 119356255  | --V--T--VRQ--M--Y----  | AV-S -DPSEL-CL-D--R--LD---A-AE-E----  |
|                                           | <i>Chlorobium luteolum</i>              | 78187587   | -----V--ARQ--M--LL---- | QA-S PD-TGL-DL-T--R--ME---A-AE-EL---- |
|                                           | <i>Chloroherpeton thalassium</i>        | 193213832  | --V-M--AK-----Y----    | KA-S PS-DPGVTL-T--Q--L---E--RT-AI---- |
|                                           | <i>Chlorobaculum limnaeum</i>           | 2501895123 | -----V-----Y----       | S-- ------L-E--A--VK--K--E----        |
|                                           | <i>Chlorobaculum thiosulfatiphilum</i>  | 139456778  | -----V-----V----       | S-- ------L-E--A-----E-----           |
|                                           | <i>Prosthecochloris marina</i>          | 110022325  | -----V--AS-----YT--    | VR-S -GSNN--IKE--Q--L---S-AE-----     |
|                                           | <i>Prosthecochloris ethylica</i>        | 175187789  | -----V--A----R--Y----  | VQ-N -NP--L--LDE--R--V-----AE-A----   |
|                                           | <i>Prosthecochloris sp. CIB 2401</i>    | 068867779  | -----V-----R--Y----    | ES-H - AEGL--LDE--Q--I-----RE-----    |
|                                           | <i>Prosthecochloris sp. HL-130-GSB</i>  | 085660087  | -----V--S-----Y----    | RQ-- -SND--TLAE-----V-----AE-R----    |
|                                           | <i>Chlorobaculum sp. 24CR</i>           | 129050436  | -----V--R--R-----      | S--S ------I-E--A--VK-----E----       |
|                                           | <i>Prosthecochloris sp. GSB1</i>        | 094081959  | -----V--V--R--YE--     | I--K -TKEGL-PLGE-TL--EK-----AT-----   |
|                                           | <i>Chlorobium sp. 445</i>               | PI046941   | ---MV-NLDA--A--V--Q    | -E-S KT-TVDITIAE-----A--KA-TE-SI--M   |
|                                           | <i>Candidatus Chlorobium masyuteum</i>  | NHQ59323   | -----V--AR-----Y----   | --S PE--EL-DLDL--D-----EE-TL-E----    |
|                                           | <i>Prosthecochloris sp. ZM_2</i>        | 114608949  | -----V--A----R--Y----  | VQ-N -NP-SL--LDE--R--V-----AE-A----   |
| Larger<br><i>Ignavibacteriae</i><br>Clade | <i>Chlorobi bacterium OLB6</i>          | KXK35372   | V-V--V--IE--TR--F--K   | S SQGEV-MDVVRKQLEE--AK-S--ENS--       |
|                                           | <i>Chlorobi bacterium OLB7</i>          | KXK53034   | ---MV-NLDA--A--V--Q    | H QGTAGLDN-AN-LAE--Q-ST-H-S--         |
|                                           | <i>Ignavibacterium album</i>            | 385809645  | V---T-SID--R--AL-F     | AQKQQQVDI-KVKQN-LE--I-SS-DVS--        |
|                                           | <i>Melioribacter roseus</i>             | 397690792  | V--Y-T-SLD--R--FK-Y    | QE-SVNI-FDDVKANLAK--EI-SG-DV--        |
| Other Bacteria                            | <i>Alistipes senegalensis</i>           | 517981532  | --L-MT---V--D--YK--    | TGKGMTVTM-EV-RN-RE--KA-MS-AVS--       |
|                                           | <i>Anaerophaga thermohalophila</i>      | 498105936  | ---MT-S-EV--R--YD-M    | VAKGES--FDEILKNV-E--EI-ST-SES--       |
|                                           | <i>Alistipes shahii</i>                 | 479186333  | --L-MT--T-V--C--YK--   | TGKGMSVTM-EV-RN-RE--KA-MS-AVS--       |
|                                           | <i>Bacteroides gallinarum</i>           | 517495756  | ---VT-S-EI--Q--YE--    | KAKGEEAGFDEIL-NV---YI-QN--VS--        |
|                                           | <i>Anoxybacillus ayderensis</i>         | 085787979  | V---L-SVE-----E-N      | VARGIPSNL-Q-K--A---I-SE-SV--          |
|                                           | <i>Peribacillus faecalis</i>            | 190999908  | --V---SVD-----T-N      | LAKGFPSDL-T-KQ--AD---Y-SE-EV--        |
|                                           | <i>Pseudomonas aeruginosa</i>           | 190306863  | V-V---SVE-----YE-N     | VKKGIPSDL-T-KK--AE--KR-ME-E----       |
|                                           | <i>Weizmannia coagulans</i>             | 013859522  | -----L-SAD-----N       | VAKGIPSDLSR-KQ--EE--L-SE-EVS--        |
|                                           | <i>Lactococcus hircilactis</i>          | 153497060  | -----V-SVD-----YK-N    | KLKGIPTEL-K-KA--AE---K-ST-ANS--       |
|                                           | <i>Thermolongibacillus altinsuensis</i> | 132947059  | V---L-SVE-----N        | IARGFPSDL-Q-K--AR--KI-SE-AV--         |
|                                           | <i>Peribacillus muralis</i>             | 057914352  | V-V---SVD---Q--Q-N     | LLKGFPDSI-K-R--AT--KL-SE-EVS--        |
|                                           | <i>Pseudomonas oryzihabitans</i>        | 145153512  | -----T-GAE--Q--YLQ-    | KQKGENV-LP--L---RE--AR-S--SV--        |
|                                           | <i>Mesobacillus selenatarsenatis</i>    | 041965682  | V-V--L-SVE---Q----N    | IQKGFPSDL-K-K--AA--KI-SE-VV--         |
|                                           | <i>Vibrio vulnificus</i>                | TDL92960   | V-V---SVD---Q--Q-N     | ILKGFPDSI-K-R--AT--KL-SE-EVS--        |
|                                           | <i>Gimesia panarensis</i>               | 145449005  | C-F-----E--R--YD-M     | QAQDKKITL-EILQQ-Y---QR--S--V--        |
|                                           | <i>Anaeromyxobacter dehalogenans</i>    | 011420571  | -F--V-T-E--R-----      | LAKGDPSTF-EVLADQLK---Q-SE-EI--        |
|                                           | <i>Anaerophaga thermohalophila</i>      | 515147035  | ---MT-S-EV--R--YD-M    | VAKGER--FDEILKN--E--ER-ST-SES--       |
|                                           | <i>Alistipes finegoldii</i>             | 390946600  | ---MT---KV--C--YD--    | RAKGDDV-L-EI-RNVRE--KA-MS-AIS--       |
|                                           | <i>Bacteroides fragilis</i>             | 492365035  | ---VT-S-EI--Q--YD--    | KAKGQEA-F-EIL-NV---HI-QT-EVS--        |
|                                           | <i>Paraprevotella xylaniphila</i>       | 495905258  | ---VT-S-EI--R--YD--    | QAKGEEG-Y-EIL-NV-E---I-TS--VS--       |
|                                           | <i>Bacillus coagulans</i>               | 516119894  | -----L-SAD-----N       | VAKGIPSDLSR-KQ--EE--L-SE-EVS--        |
|                                           | <i>Lactobacillus paracasei</i>          | 511484647  | V--YMV-SV-----YK-N     | IQKGIETPLAT--Q--AE--K-SH-AVS--        |
|                                           | <i>Clostridium ultunense</i>            | 491760968  | -----T-SIQ--M--YR--    | WEKGHS-NLSQ-----K--L-AE-S-S--         |
|                                           | <i>Eubacterium cellulosolvens</i>       | 490739887  | ---Y-T-STRT--E--YK--   | LEKGQEADLA-I-KD-E---YQ-MH-E-S--       |
|                                           | <i>Clostridium lentocellum</i>          | 326791349  | -----T-SVE---Q--YK-Y   | VQKGEK-CL-T-KV---E--YQ-SH-KIS--       |

Figure S21

Partial sequence alignment of the protein cytidylate kinase, showing a 4 aa insertion (boxed) that is found in all members belonging to the order *Chlorobiales*.

|  |                                                 |            |                             |                          |
|--|-------------------------------------------------|------------|-----------------------------|--------------------------|
|  |                                                 | 264        |                             | 311                      |
|  | <i>Prosthecochloris aestuarii</i>               | 194333263  | LFNIKASNPRTYFAEDEKDIQDEWL   | LEN R QPVQSAGVCGATSTPMWL |
|  | <i>Chlorobium phaeobacteroides</i>              | 189499431  | ----RE----S--IA-QTGL----F   | YD- G R--G-V-----        |
|  | <i>Chlorobium limicola</i>                      | 189345888  | --G--RSA---S--I--IE-LE-S-F  | RD-EG S--E-I-I-----      |
|  | <i>Chlorobium ferrooxidans</i>                  | 493410283  | -Y---RDA---S--I--VEE--P--F  | -SLNG SG-A---I-----      |
|  | <i>Chlorobium luteolum</i>                      | 8187590    | -Y---RDA---S--I--TG-LDEG--F | K-ANG S--G-V-I-----      |
|  | <i>Chlorobaculum parvum</i>                     | 193213390  | -YS---DA--HS--I--VDE--P--F  | VGENG K--E-V-I-----      |
|  | <i>Chlorobium chlorochromatii</i>               | 78188557   | -----A---F-I--IEE-NP--F     | AAHEG KA-E-V-I-----H     |
|  | <i>Chlorobaculum tepidum</i>                    | 21673122   | -YS---DA--HS--I--VDE-RP--F  | VGENG K--E-V-I-----      |
|  | <i>Chlorobium phaeovibrioides</i>               | 145220322  | -YA---EA--ESH-I--VEEL-S--F  | TTTQG KT-E-I-----        |
|  | <i>Chlorobium phaeoclathratiforme</i>           | 194335597  | -YH---EA---S--I-EIEE-EER--F | RNSDG RA-ATV-----H       |
|  | <i>Chloroherpeton thalassium</i>                | 193213833  | --EV--DA-SN-H-I-NQSELERA-F  | -RPDD SL-E-V-----V       |
|  | <i>Prosthecochloris ethylica</i>                | NUK47677   | -Y---S---S--V-N-E--DRD--F   | MRN G S--DNV-----        |
|  | <i>Prosthecochloris marina</i>                  | 110022730  | -----Q--S-S--I-N-N-L--F     | SDN G ST-ENV-----        |
|  | <i>Chlorobaculum thiosulfatiphilum</i>          | 139456775  | -YS--RDA--KS--I--VDE--P--F  | VGENG K--E-V-I-----      |
|  | <i>Chlorobaculum limnaeum</i>                   | 2501895126 | -YS--RDA--KS--I--VE--LP--F  | VGDDG K---V-I-----       |
|  | <i>Prosthecochloris aestuarii</i>               | 012505013  | -----KS-----                | -----                    |
|  | <i>Cand. Thermochlorobacter aerophilum</i>      | RFM22955   | --GV---A-----H-DEL-AD-F     | MREDG TL-E-V-----        |
|  | <i>Chlorobium sp. 445</i>                       | PI048543   | --GV---A-----H-GEL-A--F     | QRSDG L--E-V-----        |
|  | <i>Chlorobium sp. KB01</i>                      | 076792162  | -Y---RDA---S--I--VEE--P--F  | -SLND SS-A---I-----      |
|  | <i>Prosthecochloris sp. ZM</i>                  | 114617735  | -----                       | -----                    |
|  | <i>Prosthecochloris sp. HL-130-GSB</i>          | 085660515  | -Y---E--S-S--V--H--R--      | I-K G ---DNT-----        |
|  | <i>Prosthecochloris sp. ZM_2</i>                | 114607604  | -Y---S---S--V-N-E--DRD--F   | MR- G S--DNV-----        |
|  | <i>Chlorobaculum sp. 24CR</i>                   | 129050439  | -YS--RDA--HS--I--VEE-LP--F  | VGDDG K---V-I-----       |
|  | <i>Chlorobium sp. N1</i>                        | 131354410  | -Y---REA--ESH-I--VEE-DP--F  | RLKDG GTAE-V-----        |
|  | <i>Chlorobi bacterium NICIL-2</i>               | KXB97964   | --DVARSE-----I--VSEL-S--F   | EGAE-V-IT-----Q-         |
|  | <i>Chlorobi bacterium OLB6</i>                  | KXK35371   | --EVSRSA--A-H-I-EIDE--P--F  | TN-NTV-IS-----Q-         |
|  | <i>Pontibacter roseus</i>                       | 517290586  | -YSV--QH--NS--V-N-EEL-K--F  | ENA--V-I-----            |
|  | <i>Nitritalea halalkaliphila</i>                | 496346574  | -Y-V--ER--N-H-VSNSAQV--S-F  | G-G--V-I-----            |
|  | <i>Cyclobacterium marinum</i>                   | 343084681  | -YQV--HI---S--V-N-TE-NSD--F | N-ADKI-I-----            |
|  | <i>Cyclobacteriaceae bacterium</i>              | 499125948  | -Y-V--ER--N--VSNPEEVSAD-F   | S-N-TV-----              |
|  | <i>Rhodonellum psychrophilum</i>                | 518425835  | --V--ER-QN---VSNPEQVDK--F   | LEG-TI-I-----            |
|  | <i>Cand. Azobacteroides pseudotrichonymphae</i> | 212550484  | --E-RRA-LN--LIS-----S--F    | NGIK-V-I-----K--         |
|  | <i>Echinicola vietnamensis</i>                  | 431797370  | -YQV---Q---S--V-N-GE-DPD-F  | ANGDKV-I-----            |
|  | <i>Echinicola pacifica</i>                      | 517284044  | -YQV---E---S--V-N-NELDPK-F  | D-QDKV-I-----            |
|  | <i>Cesiribacter andamanensis</i>                | 496487984  | -YAV--HH--QS--I-N-SE-DPA--F | EGK--V-I-----            |
|  | <i>Hymenobacter norwichensis</i>                | 551196148  | --SVVNKT--S--V-N-QE-DE--F   | HGAE-V-I-----            |
|  | <i>Mariniradius saccharolyticus</i>             | 495907062  | --QV-LSE---S--V-N-TE-DPS-F  | T-QDKV-I-----            |
|  | <i>Cecembia lonarensis</i>                      | 496476169  | -Y-V--EK--N--VSNPDQVLSD-F   | VSNTEV-I-----            |
|  | <i>Marivirga tractuosa</i>                      | 313675572  | -Y-V--DK--N--ISNTTELDKS-F   | -END-V-I-----            |
|  | <i>Flexithrix dorotheae</i>                     | 522016070  | -Y-V--KF---S--I-N-SE-AS--F  | S-NDKV-IS-----           |
|  | <i>Cyclobacterium qasimii</i>                   | 527058107  | --V--EK--Q--VSCPPEVDK-F     | KAGE-V-I-----            |
|  | <i>Thermonema lapsum</i>                        | 166917974  | --EV-RSE--HS--I--AE--E--F   | EGAR-V-I-----            |
|  | <i>Chitinophagales bacterium</i>                | MBX7109056 | --V--A--NS--VSE-A-L-Q--F    | RSA--V-I-----L-          |
|  | <i>Hymenobacter wooonensis</i>                  | 135529319  | --SVVNKT--S--V-N-QEL---F    | -GME-V-I-----            |
|  | <i>Candidatus Kapabacteria bacterium</i>        | TAE32473   | -Y-VA-----I--VQEV----       | EG-KTV-IS-----Q--        |
|  | <i>Cyclobacterium plantarum</i>                 | 166150147  | --QV--GV---S--V-N-Q--NPD-V  | R-ED-V-I-----            |
|  | <i>Raineyia orbicola</i>                        | 101358740  | --AV-QKA---S--V---EL-P--F   | ENCE-I-I-----            |
|  | <i>Algoriphagus aquimarinus</i>                 | 146915010  | --V--DT--N-F-VSNSEE-ESD-F   | IENDRV-I-----            |
|  | <i>Cyclobacterium lianum</i>                    | 073090759  | --V-REK-----VSSPEEVDA--F    | AEGE-V-I-----            |
|  | <i>Pontibacter korlensis</i>                    | 046308989  | -YSV--QH--NS--V-N-EEL-R--F  | AE-G-V-I-----            |
|  | <i>Nitritalea halalkaliphila</i>                | 009055752  | -Y-V--ER--N-H-VSNSAQV--S-F  | G-G--V-I-----            |
|  | <i>Catalinimonas alkaloidigena</i>              | 089684683  | -Y-V--ET--H--VSTRSEV-SA-F   | --HDTV-I-----            |
|  | <i>Cyclobacterium plantarum</i>                 | 166146163  | --V--EK--Q--VSSPEEVNPD-F    | SEG--V-I-----            |
|  | <i>Solirubrum puertoriconensis</i>              | 059067372  | --GVVNHE--S--V-N-QEL---F    | DDAA-V-I-----            |
|  | <i>Marivirga sericea</i>                        | 085516784  | -YQV---Q--NS--I-N--EVDPL-F  | EGQKT-V-I-----           |
|  | <i>Penaeicola halotolerans</i>                  | 226390616  | -YQV-LQE---S--V-N-TE-SN--F  | EKSDKV-I-----            |
|  | <i>Siccationidurans arizonensis</i>             | SFP99765   | -YQV-LET--Q-H-ISNVAE--P--F  | G-G--V-I-----            |
|  | <i>Cecembia rubra</i>                           | 211299928  | -Y-V--DK--N--VSNPEQVNL-D-F  | SANE-V-I-----            |
|  | <i>Sporocytophaga myxococcoides</i>             | 028981416  | -YSV---E-EKS--V-N-LELDPN-F  | K-SY-V-I-----            |
|  | <i>Siccationidurans arizonensis</i>             | 092675538  | --SVVN-V---S--I-N-AEVDE--F  | AGAEKV-I-----L--         |
|  | <i>Aquiflexum balticum</i>                      | 084119878  | -YQV--NI--KS--V-N-TE-DLS-I  | N-QDKV-I-----            |
|  | <i>Mucilaginibacter pankratovii</i>             | 191189761  | -YQV-REA--HC--VSGTN--AG-F   | S-G-KV-I-----            |
|  | <i>Algoriphagus machipongonensis</i>            | 495474052  | -YQV-LGQ---S--I-N-TELDP--F  | KSNDKV-----              |
|  | <i>Cytophaga hutchinsonii</i>                   | 110636514  | -YGV--QE-E-S--V-N-TE-EPS-I  | RATDNV-I-----            |
|  | <i>Indibacter alkaliphilus</i>                  | 496324935  | -HQV--GV-E-S--V-N-TE-DPR--F | MHAD-V-I-----            |
|  | <i>Alistipes indistinctus</i>                   | 496424989  | -YQT-L-H---S-TV---TEL-PA-F  | DNCR-V-I-----K--         |
|  | <i>Cytophaga aurantiaca</i>                     | 517152557  | -YGV--QE-E-S--V-N-NE-EES-I  | RSTDKI-I-----            |
|  | <i>Hymenobacter aerophilus</i>                  | 518788809  | --SVVNQT--S--V-N-QELDEA-F   | HGAD-V-I-----            |
|  | <i>Alistipes putredinis</i>                     | 548242045  | --EV-RRA--S-NV-EASELRP--F   | EGAE-V-I-----K--         |
|  | <i>Hymenobacter aerophilus</i>                  | 518790560  | -YQV--DT--A-H-ISKID-LDPA-F  | --G--V-I-----Q           |
|  | <i>Pedobacter heparinus</i>                     | 255533499  | -YDV--KY-DNS--ISNTEE-DK--F  | S-GDKV-I-----            |
|  | <i>Nafulsella turpanensis</i>                   | 516343586  | -YSV-RQQ-EKS--I-N-SELEPS-F  | NGTK-V-I-----            |

Figure S22

Partial sequence alignment of the protein 4-hydroxy-3-methylbut-2-enyl diphosphate reductase, showing a 2-5 aa insertion (boxed) that is found in all members belonging to the order *Chlorobiales*

|                              |                                               |            |                            |                            |
|------------------------------|-----------------------------------------------|------------|----------------------------|----------------------------|
| Order<br><i>Chlorobiales</i> | <i>Chloroherpeton thalassium</i>              | 193214979  | KRFMGRTQDEVPEETKMVPYQIVS   | EGNQARVKIGDKTHSPQEISAMILQK |
|                              | <i>Prosthecochloris vibrioformis</i>          | 139626732  | -----RY---N-K-IA--KVIN     | ANGE---QV---NY-----V---    |
|                              | <i>Chlorobium ferrooxidans</i>                | 493411055  | -----KY---N-K--A--E-IN     | -SGE-----N--IY----V-----   |
|                              | <i>Chlorobium phaeoclathratiforme</i>         | 194337182  | -----KY---IND-K-LA--E-IN   | --GE-----N--IY----V-----   |
|                              | <i>Chlorobaculum tepidum</i>                  | 4928210    | -----KY---N-K-LAS-DV-N     | --GY-K-----Y-----          |
|                              | <i>Prosthecochloris aestuarii</i>             | 194333589  | -----KF---N-K-IA--KV-N     | INGE---E-D---Y-----        |
|                              | <i>Chlorobaculum tepidum</i>                  | 4928210    | -----KY---N-K-LAS-DV-N     | --GY-K-----Y-----          |
|                              | <i>Chlorobium luteolum</i>                    | 78186504   | ---I---KF---N-K-IA--EV-N   | --GE-----N--Y----V-----    |
|                              | <i>Chlorobium phaeovibrioides</i>             | 145219963  | ---V---KF---N-K-IA--AV-N   | --GE-----N--Y----V-----    |
|                              | <i>Chlorobaculum parvum</i>                   | 193212312  | -----KY---N-K-FAS-DV-N     | --GD-----E-SY-----         |
|                              | <i>Chlorobium phaeobacteroides</i>            | 119356695  | ---V---KF---N-K-LA--D--N   | --GE-----N--AY-----        |
|                              | <i>Chlorobium limicola</i>                    | 189346291  | -----KY---N-K-LAS-DVIN     | --GE-----N--IY---V-----    |
|                              | <i>Chlorobium chlorochromatii</i>             | 78189848   | -----RF---G--K--A--ELIN    | DSGE-----N--VY-----V---    |
|                              | <i>Chlorobaculum thiosulfatiphilum</i>        | 139457351  | -----KY---N-K-FAS-DV-N     | --GD-K--A-KSY-----         |
|                              | <i>Chlorobaculum limnaeum</i>                 | 2501895415 | -----KY---N-K-LAS-DV-N     | --GD-K-----SY-----         |
|                              | <i>Prosthecochloris ethylica</i>              | 175187396  | -----KF---N-K-IA--KV-N     | VNGD---E---Y-----V---      |
|                              | <i>Prosthecochloris marina</i>                | 110023859  | -----KF---N-K-IA--KV-N     | TNGE---E-D---Y-----        |
|                              | <i>Chlorobium sp. N1</i>                      | 131357844  | ---V---KF---N-K-IA--EV-N   | --GE-----N--Y-----         |
|                              | <i>Chlorobium sp. KBO1</i>                    | 076789965  | -----KY---N-K--A--E-IN     | -SGE-----N--IY---V-----    |
|                              | <i>Chlorobium sp. 445</i>                     | PI047222   | -----GYA--T--I-----EVIN    | --GQ---R-SG-VY-----        |
|                              | <i>Chlorobaculum sp. 24CR</i>                 | 129051597  | -----KY---N-K-FAS-DV-N     | --GD-K-----Y-----          |
|                              | <i>Prosthecochloris sp. HL-130-GSB</i>        | 085659873  | -----KF---N-K-IA--KV-N     | VNGD---E---Y-----          |
|                              | <i>Prosthecochloris sp. ZM_2</i>              | 114608885  | -----KF---N-K-IA--KV-N     | VNGD---E---Y-----V---      |
|                              | <i>Prosthecochloris sp. CIB 2401</i>          | 068867518  | -----RY---N-K-IA--KVIN     | ANGE---EV---NY-----V---    |
|                              | <i>Prosthecochloris sp. GSB1</i>              | 094082850  | -----KY---N-K-IA--KV-N     | VNGE--ADV-G-VY-----        |
|                              | <i>Cand. Thermochlorobacteriaceae GBChLB</i>  | KER10339   | -----SYS--TS-M-L---EV--    | GN-SVT-RADG-EFT-----       |
|                              | <i>Candidatus Chlorobium masyuteum</i>        | 166808359  | -----KY---N-K--A--E-IN     | -SGE-----N--IY---V-----    |
|                              | <i>Cand. Thermochlorobacter aerophilum</i>    | RFM23545   | -----SYA--T--I-----EVIN    | -NG-----R-A-KVY-----       |
|                              | <i>Chlorobi bacterium OLB6</i>                | KXK32426   | -----QMN-ISD-S-S--K--A G   | DN-T--D-DGRHY--P-----      |
|                              | <i>Ignavibacterium album</i>                  | 385810489  | -----FY---ER-RSE---EV-R G  | -N-TV-----RLY--P-----      |
|                              | <i>Melioribacter roseus</i>                   | 397691407  | -----RI---QQ-I-E---EV-G S  | DNGS-----RLY--P-----       |
|                              | <i>Rectinema subterraneum</i>                 | 158906686  | -----RYA--QQ-I---KVID      | N--DV--EA-G-LY-----F---    |
|                              | <i>Prevotella histicola</i>                   | MBF1400696 | -----E-Y-QCKK-AER--FKV-N   | --GYP--Q-D-RKYT-----       |
|                              | <i>Butyrlicimonas synergistica</i>            | 517148057  | -----E-Y-Q-SK-INR--KVIR G  | -N-TP--E---RKY-----        |
|                              | <i>Paraprevotella xylaniphila</i>             | 495904162  | -----E-Y-Q-QK-ISR--SV-R G  | DN-TP--D-EGRLYT-----V---   |
|                              | <i>Parabacteroides merdae</i>                 | 491875350  | -----E-Y-Q-QK-ISR--KV-R G  | DN-TP--D-EGRLYT-----V---   |
|                              | <i>Porphyromonas gulae</i>                    | 517795685  | -----E-Y-Q-SR-VDR--FKV-R G | DN-TP--D-DSRLYT-----       |
|                              | <i>Salibacter halophilus</i>                  | 151166926  | -----A-W---KD-VSR--EV-K G  | D--TP--D--MYT-----         |
|                              | <i>Candidatus Termititenax aidoneus</i>       | GBR74801   | -----LHS--G--E-L---HV-D G  | NGGA-A---D---YT-P-----     |
|                              | <i>Candidatus Kryptobacter tengchongensis</i> | 072149596  | -----FY---I--ARR--KV-R G   | PN-T---Q---RVY--P-----     |
|                              | <i>Candidatus Thermokryptus mobilis</i>       | HGD81894   | -----FY---I--ARR--KV-R G   | PN-T---Q---RVY--P-----     |
|                              | <i>Gracilimonas mengyeensis</i>               | 142454917  | -----MF---KD---Q-S-E--K G  | DD-T---E--RMYA-----V---    |
|                              | <i>Butyrlicimonas virosa</i>                  | HJF71204   | -----E-Y-Q-AK-INR--KV-R G  | -N-TP--E---RKY-----        |
|                              | <i>Blattabacterium cuenoti</i>                | 185855363  | -----MYS--S--L-NT--K-IK G  | GN-TP--S--NRLY-----        |
|                              | <i>Theionarchaea archaeon</i>                 | MBU7016505 | -----YY---ES-RNT-Q-EV-R G  | SS-D-----VY-----K-         |
|                              | <i>Candidatus Sulcia muelleri</i>             | 157877757  | -----NFS--T--L-NI--K-IK G  | -NDTP--S--N-LYT-----       |
|                              | <i>Candidatus Butyrlicimonas faecavium</i>    | HJA14976   | -----E-Y-Q-DK-INR--KV-R G  | -N-TP--E---RKY-----        |
|                              | <i>Thermovirga lienii</i>                     | 014163731  | -----NYS--A--M---KV-E G    | PH-SV--VV---QYA-E---R-     |
|                              | <i>Longimonas halophila</i>                   | 098062166  | -----NY-DLG--LDE--EV-R G   | D-GTP--L--REYT-----        |
|                              | <i>Butyrlicimonas synergistica</i>            | 018336875  | -----E-Y-Q-SK-INR--KVIR G  | -N-TP--E---RKY-----        |
|                              | <i>Chryseolinea soli</i>                      | 119753531  | -----KKF---S--K-I-S---E G  | NN-TV--R---RLFT-----       |
|                              | <i>Tannerella forsythia</i>                   | 375254445  | -----E-F-Q-QK-INRI--KV-R G | DN-TP--D-DGRLYT-----       |
|                              | <i>Niabella soli</i>                          | 570743717  | -----KY---KD-LSHIS-KV-R G  | DNDTI-ID-DGRLYT-----       |
|                              | <i>Porphyromonas gingivalis</i>               | 545441075  | -----E-Y-Q-SR-VER--FKV-R G | DN-TP--D-DGRLYT-----       |
|                              | <i>Parabacteroides distasonis</i>             | 150008611  | -----E-Y-Q-QK-INR--KV-R G  | DN-TP--D-EGRLYT-----       |
|                              | <i>Bacteroides salanitronis</i>               | 325298699  | -----E-Y-Q-QK-ISR--VAR G   | -N-TP--D-DGRLYT-----       |
|                              | <i>Parabacteroides johnsonii</i>              | 495424325  | -----E-Y-Q-QK-INR--KV-R G  | DN-TP--D-EGRLYT-----V---   |
|                              | <i>Bacteroides barnesiae</i>                  | 517540391  | -----E-Y-Q-QK-ISR--SV-R G  | DN-TP--D-DGRLYT-----       |
|                              | <i>Paraprevotella clara</i>                   | 547244504  | -----E-Y-Q-QK-IAR--SV-K G  | DN-TP--D-EGHLYT-----       |
|                              | <i>Thermophagus xiamenensis</i>               | 498214569  | -----TMY--I--N-V-R--KV-K G | DN-TP--Q-D-RQYT-----       |
|                              | <i>Pedobacter agri</i>                        | 498288294  | -----NSY--SAK-AGR--KV-K G  | DN-TP--E-D-RKYT-----       |
|                              | <i>Candidatus Latescibacter</i>               | 551164463  | -----KY---QN-ISE--KVMK G   | NNET---S---EY--P---FV---   |
|                              | <i>Nitrospina gracilis</i>                    | 491151244  | -----SYA--S--M---KV-K G    | PK-DV-IEVQG-QY--P-----     |
|                              | <i>Candidatus Solibacter</i>                  | 116626521  | -----RY---N--M---KV-R G    | -NGD---D-MG-KY--P-----T-   |
|                              | <i>Caldithrix abyssi</i>                      | 493986463  | -----FYN--EK-I-E---KVER G  | NN-VVV-EVMG-KYT-P-----     |

Figure S23

Partial sequence alignment of the protein molecular chaperone DnaK, showing a 1 aa deletion (boxed) that is found in all members belonging to the order *Chlorobiales*. Except for an isolated exception shown here, the CSI was not found in any other bacterial species in the top 500-BLASTp hits.

|  |                                              |            |                          |                          |
|--|----------------------------------------------|------------|--------------------------|--------------------------|
|  |                                              | 16         |                          | 59                       |
|  | <i>Chlorobium chlorochromatii</i>            | 78188056   | LHLGHYTGALENWVAQQNCSA    | DGNRAYDT YFLIADYHTLTSTL  |
|  | <i>Prosthecochloris vibrioformis</i>         | 139626009  | -----ER---ETL-           | --S---E---V---S---       |
|  | <i>Chlorobium phaeobacteroides</i>           | 189501390  | -----F-----R-ELD-        | --Q--FE- F-----N-----    |
|  | <i>Prosthecochloris aestuarii</i>            | 194335025  | -----R---ETGP            | -----V--- F-----N-----   |
|  | <i>Chlorobium phaeoclathratiforme</i>        | 194337843  | -----F-----S-E---LDE     | T-A-V-E- C-----N-----    |
|  | <i>Chlorobaculum parvum</i>                  | 193213678  | -----S-----I---LLQP      | --S---E- C-----S-----    |
|  | <i>Chlorobium luteolum</i>                   | 162139381  | -----IE---LRAP           | --S-L-E- C-----S-----    |
|  | <i>Chlorobium limicola</i>                   | 189347951  | -----H---LLAE            | --S-V-E- C-----I-----    |
|  | <i>Chlorobium phaeovibrioides</i>            | 145220533  | -----V---LTNP            | --T-GCE- C-----N-----    |
|  | <i>Chlorobium ferrooxidans</i>               | 493409794  | -----S-E---RNE           | A-E-V-E- C-----N-----    |
|  | <i>Chlorobaculum tepidum</i>                 | 21672854   | -----I---LLHP            | --S---E- C-----S-----    |
|  | <i>Chlorobaculum limnaeum</i>                | 2501894004 | -----I---LLHP            | --S---E- C-----S-----    |
|  | <i>Pelodictyon phaeoclathratiforme</i>       | 012509488  | -----F-----S-E---LDE     | T-A-V-E- C-----N-----    |
|  | <i>Chlorobaculum thiosulfatophilum</i>       | 139456449  | -----I---LLHP            | --S---E- C-----S-----    |
|  | <i>Prosthecochloris marina</i>               | 110024017  | -----R-DELDT             | G-K-VFE- -----S-----     |
|  | <i>Candidatus Chlorobium masyuteum</i>       | 166807408  | -----S-E---RNE           | A-E-V-E- -----CN-----    |
|  | <i>Cand. Thermochlorobacteria aerophilum</i> | KER10736   | -----V-----HL- ERAQ      | N-AKT-QN FH-----A---N    |
|  | <i>Chlorobium sp. KB01</i>                   | 076791230  | -----W-E---RNE           | A-E-V-E- C-----N-----    |
|  | <i>Chlorobium sp. N1</i>                     | 131355342  | -----IE---LTAQ           | --T-V-E- C-----N-----    |
|  | <i>Prosthecochloris sp. ZM</i>               | 114616499  | -----R-ETDP              | -----V--- F-----N-----   |
|  | <i>Prosthecochloris sp. GSB1</i>             | 094083507  | -----R-ELD-              | Q-----E- W-----S-----    |
|  | <i>Prosthecochloris sp. CIB 2401</i>         | 068868322  | -----ER-ETL-             | --S---E- -----V---S----- |
|  | <i>Chlorobaculum sp. 24CR</i>                | 129051262  | -----I---LLHP            | --S---Q- C-V---S-----    |
|  | <i>Cand. Thermochlorobacteriaceae GBCh1B</i> | KER10736   | -----V-----HL- ERAQ      | N-AKT-QN FH-----A---N    |
|  | <i>Ignavibacterium album</i>                 | 385810136  | --I---V-----KL-H-YQS     | FY-----V---N-            |
|  | <i>Melioribacter roseus</i>                  | 397691543  | -----V-----IDL---YDS     | -H-----V---D-            |
|  | <i>Terriglobus saanensis</i>                 | 320108440  | -----N-M---Y---RL-DEYEC  | --F---I-A---DY           |
|  | <i>Acidobacterium capsulatum</i>             | 225874157  | -----N-M---A---RL-HEYEC  | --F---W-A---DY           |
|  | <i>Granulicella mailensis</i>                | 374313410  | -----N-M---Y---RL-HEYDC  | --F---L-A---DY           |
|  | <i>Rubrivivax benzoatilyticus</i>            | 497542852  | -----H---K---RL-D-YDC    | FYFV--W-A---HY           |
|  | <i>Rubrivivax gelatinosus</i>                | 383759274  | -----H---K---RL-D-YDC    | F-FV--W-A---HY           |
|  | <i>Pseudogulbenkiania ferrooxidans</i>       | 545114536  | -----H-VIK---EL-HSHEC    | F-MV--W-A---NF           |
|  | <i>Chromobacterium violaceum</i>             | 34497152   | -----H-VIK---EL-HSHEC    | F-MV--W-A---NF           |
|  | <i>Sulfuricella denitrificans</i>            | 543963298  | -----H-V-K---IKL-HEYEC   | L-FV--W-A---HY           |
|  | <i>Methylobacter versatilis</i>              | 297538009  | -----N-V-K---IKL-HEHEC   | L-FV--W-A---HY           |
|  | <i>Methyloversatilis universalis</i>         | 519008995  | -----H-V-K---KL-HEYPC    | L-FV--W-A---NY           |
|  | <i>Uliginosibacterium gangwonense</i>        | 517434921  | --I---H---K---RL-EEKEC   | F-FV--W-A---AY           |
|  | <i>Ralstonia pickettii</i>                   | 241662685  | -----H-V-K---RL-AEYPC    | F-FV--W-A---HY           |
|  | <i>Thiobacillus denitrificans</i>            | 516742345  | -----H-V-K---LRL--EYQC   | L-FV--W-A---HY           |
|  | <i>Sideroxydans lithotrophicus</i>           | 291614089  | -----H-V-K---QM-H-YEC    | L-FV--W-A---HY           |
|  | <i>Methylobacter mobilis</i>                 | 518739869  | -----N-V-K---IRL-HEHEC   | L-FV--W-A---HY           |
|  | <i>Methylovorus glucosetrophus</i>           | 253998633  | -----H-V-K---TRL-HEHEC   | L-FV--W-A---HY           |
|  | <i>Ralstonia syzygii</i>                     | 344174282  | -----H-V-K---RL-AEYPC    | F-FV--W-A---HY           |
|  | <i>Ralstonia solanacearum</i>                | 489361767  | -----H-V-K---RL-AEYPC    | F-FV--W-A---HY           |
|  | <i>Nitrosospora multiformis</i>              | 82703434   | -----H-V-K---IEL-H-FEC   | L-FV--W-A---HY           |
|  | <i>Thauera phenylacetica</i>                 | 490504997  | -----H-V-K---KL-EEFPC    | L-FV--W-A---HY           |
|  | <i>Aquaspirillum serpens</i>                 | 550892077  | -----H---K---KL-SEHEC    | F-FV--W-A---Y            |
|  | <i>Thiobacillus thioparus</i>                | 517333907  | -----H-V-K---LRL--EYQC   | L-FV--W-A---HY           |
|  | <i>Aromatoleum aromaticum</i>                | 56478939   | -----H-V-K---KL-AEYPC    | L-FV--W-A---AY           |
|  | <i>Marinobacter manganooxydans</i>           | 495449703  | -----H-V-K---KL-HEFEC    | F-FV--W-A---NY           |
|  | <i>Bermanella marisrubri</i>                 | 494075287  | -----H-V-K---KL-HEYEC    | F-FV--W-A---TY           |
|  | <i>Marinobacter nanhaiticus</i>              | 490719494  | -----H-V-K---KL-HEFEC    | F-FV--W-A---NY           |
|  | <i>Marinobacter hydrocarbonoclasticus</i>    | 387814531  | -----H-V-K---KL-HEYEC    | F-FV--W-A---QY           |
|  | <i>Hahella chejuensis</i>                    | 83635470   | -----H-V-K---QL-HEYEC    | F-FV--W-A---HY           |
|  | <i>Methylophaga lonarensis</i>               | 497412846  | -----H-V-K---IKL-HEFDC   | F-FV--W-A---HY           |
|  | <i>Flexistipes sinusarabici</i>              | 336323462  | --I---F---Q---SL-DKYEC   | FYF--W-A---GY            |
|  | <i>Deferribacter desulfuricans</i>           | 291279394  | --I---F---K---KL-E-YEC   | FYFV--W-A---Y            |
|  | <i>Denitrovibrio acetiphilus</i>             | 291287275  | --I---F---K---DL-DKYDC   | NYFV--W-A---NY           |
|  | <i>Calditerrivibrio nitroreducens</i>        | 313673527  | --I---F---K---KL-DNYDC   | -YF--W-A---NF            |
|  | <i>Desulfurella acetivorans</i>              | 573478392  | -----NLV---Q---INL-DKYKC | -YFV--W-A---GF           |
|  | <i>Pelobacter propionicus</i>                | 118580108  | --I---FH-V---IRI-D-MEC   | F-FV--W-S---EY           |
|  | <i>Syntrophobacter fumarooxydans</i>         | 116748129  | -----NLH---D---IQL-Q-YEC | F-FV--W-A---EY           |
|  | <i>Geobacter sulfurreducens</i>              | 39996932   | -----FH-V-A---REL-EEYEC  | F-FA--W-S---EY           |
|  | <i>Desulfurobacterium thermolithotrophum</i> | 325295466  | I---N-L---KT-LEL-DKAEC   | F-F---W-AI---Y           |
|  | <i>Thermovibrio ammonificans</i>             | 319790140  | I---N-F---KA-IEL-DRAES   | F-F---W-AI---Y           |

Figure S24

Partial sequence alignment of the protein tryptophanyl-tRNA synthetase, showing a 8 aa insert (boxed) that is found in all members belonging to the order *Chlorobiales*.

|                                             |                                               |                   |                         |                           |                           |                        |     |
|---------------------------------------------|-----------------------------------------------|-------------------|-------------------------|---------------------------|---------------------------|------------------------|-----|
| Order<br>Chlorobiales                       | <i>Chlorobium ferrooxidans</i>                | 493409794         | 153                     | VPVGEDQLPHVEITREIARRFNLY  | QHPIL                     | GEVFPEPAPKITKFSRLPGLDG | 204 |
|                                             | <i>Prosthecochloris vibrioformis</i>          | 139626009         | -----I-----Q-           | ---GT                     | -S--E--E---R---V---       |                        |     |
|                                             | <i>Chlorobium phaeobacteroides</i>            | 189501390         | -----I-----Q-           | ---VF                     | -D--E--E-----A---         |                        |     |
|                                             | <i>Chlorobium chlorochromatii</i>             | 78188056          | -----I-----K--HF        | P--LY                     | -N--A--E-----A--A---      |                        |     |
|                                             | <i>Chlorobium luteolum</i>                    | 78167834          | -----I-----K--H-        | P--TK                     | ---L--E-----V---          |                        |     |
|                                             | <i>Chlorobaculum parvum</i>                   | 193213678         | -----I-----K--SH-       | ---E-                     | -D-----A--V---            |                        |     |
|                                             | <i>Chlorobium phaeoclathratiforme</i>         | 194337843         | -----I-----V--K--HF     | P--L-                     | ---A--E-----V---          |                        |     |
|                                             | <i>Chlorobaculum tepidum</i>                  | 21672854          | -----I-----K--SH-       | ---E-                     | -D-----A--V---            |                        |     |
|                                             | <i>Chlorobium limicola</i>                    | 189347951         | -----I-----K--FH-       | P--ET                     | -N-----E-----V---         |                        |     |
|                                             | <i>Chlorobium phaeovibrioides</i>             | 145220533         | -----I-----K--SH-       | P--QS                     | -P--V--E-----V---         |                        |     |
|                                             | <i>Prosthecochloris aestuarii</i>             | 194335025         | -----I-----KH-          | LL-DG                     | VA--D--E-----M---         |                        |     |
|                                             | <i>Prosthecochloris marina</i>                | 110024017         | -----I-----KQ-          | ---E-                     | -D--E--E-----A---         |                        |     |
|                                             | <i>Chlorobaculum thiosulfatophilum</i>        | 139456449         | -----I-----K--SH-       | ---E-                     | -D-----S-----A--V---      |                        |     |
|                                             | <i>Prosthecochloris aestuarii</i>             | 012506768         | -----I-----KH-          | LL-D                      | VA--D--E-----M---         |                        |     |
|                                             | <i>Chlorobaculum limnaeum</i>                 | 2501894004        | -----I-----K--SH-       | ---T-                     | -D-----A--V---            |                        |     |
|                                             | <i>Candidatus Chlorobium masyuteum</i>        | 166807408         | -----L-----AT-          | PK-DG                     | NG----EG-----V---         |                        |     |
|                                             | <i>Candidatus Thermochlorobacteri GBCh1B</i>  | KER10736          | -----I-----K--H-        | P--TK                     | ---V--E-----V---          |                        |     |
|                                             | <i>Chlorobium sp. N1</i>                      | 131355342         | -----I-----K--H-        | ---L-                     | ---L-----V---             |                        |     |
|                                             | <i>Chlorobium sp. KB01</i>                    | 076791230         | -----I-----K--SH-       | ---A-                     | -D-----S-----A--V---      |                        |     |
|                                             | <i>Chlorobaculum sp. 24CR</i>                 | 129051262         | -----I-----Q-           | ---GT                     | -S--E--G---R--V---        |                        |     |
|                                             | <i>Prosthecochloris sp. CIB 2401</i>          | ANT65961          | -----L-----L--HF        | P--AT                     | -G--E--E-R-----A---       |                        |     |
|                                             | <i>Prosthecochloris sp. GSB1</i>              | 094083507         | -----I-----KH-          | LL-DG                     | VA--D--E-----M---         |                        |     |
|                                             | <i>Prosthecochloris sp. ZM</i>                | 114616499         | -----I-----Q-           | PK-NG                     | QA----EGRL---A--V---      |                        |     |
| Ignavibacteriae                             | <i>Cand. Thermochlorobacter aerophilum</i>    | RFM23396          | -----V--I--S-----Q-     | -----E-LL---A--Q---       | -----E-LL-S-A---          |                        |     |
|                                             | <i>Ignavibacterium album</i>                  | 385810136         | -----V--I--S-----Q-     | -----S-----QALLS--P--I--- | -----S-----QALLS--P--I--- |                        |     |
|                                             | <i>Melioribacter roseus</i>                   | 397691543         | -----V--I--Q--K-V---Q-  | KP-LV-                    | K-LVGDVP--V---            |                        |     |
|                                             | <i>Paenibacillus terrigena</i>                | 517587309         | -----L-----D-----QT-    | AP-----E-LL-E-A-----      | AP-----E-LL-E-A-----      |                        |     |
|                                             | <i>Paenibacillus alvei</i>                    | 544846112         | -----Y-I--LS-----       | K-----D-IV-RIPK---T---    | K-----D-IV-RIPK---T---    |                        |     |
|                                             | <i>Candidatus Kryptonium thompsoni</i>        | CUT00468          | -----D--K---QV-         | AP-----E-LL-E-A-----      | AP-----E-LL-E-A-----      |                        |     |
|                                             | <i>Marinitoga litoralis</i>                   | 205100913         | -----I-----Y--          | D-----EA-LG-VTK-L---      | D-----EA-LG-VTK-L---      |                        |     |
|                                             | <i>Candidatus Chrysospegis kryptomonas</i>    | 092346731         | -----L--L-----FF-       | -----Q-IL--AKV---T---     | -----Q-IL--AKV---T---     |                        |     |
|                                             | <i>Orenia marismortui</i>                     | 134118996         | -----L---D--K---QV-     | AP-----E-LL-E-A-----      | AP-----E-LL-E-A-----      |                        |     |
|                                             | <i>Acetivibrio cellulolyticus</i>             | 026073659         | -----I--L-----HM-       | K-I-----KAML-EEAK-L-I---  | K-I-----KAML-EEAK-L-I---  |                        |     |
|                                             | <i>Candidatus Kryptobacter tengchongensis</i> | CUU06683          | -----I--L-----HM-       | EP-----QALL-EEAK---I---   | EP-----QALL-EEAK---I---   |                        |     |
|                                             | <i>Hydrogenothermus marinus</i>               | 170145601         | -----I--L-----HM-       | E-I-----E--LGEVPK-L---    | E-I-----E--LGEVPK-L---    |                        |     |
|                                             | <i>Persephonella atlantica</i>                | 200673337         | -----I--L-----HM-       | -PI-----K-SLS-SAI---I---  | -PI-----K-SLS-SAI---I---  |                        |     |
|                                             | <i>Acetivibrio saccincola</i>                 | 101301108         | -----I--L-----HM-       | T-L-----QA-L-EQAK---      | T-L-----QA-L-EQAK---      |                        |     |
|                                             | <i>Persephonella atlantica</i>                | MBK3331940        | -----I--L-----HM-       | -----KAL-SD-P--M---       | -----KAL-SD-P--M---       |                        |     |
|                                             | <i>Sporohalobacter salinus</i>                | 204989152         | -----I--L-----HM-       | -----IL---EAL-SD-P--M---  | -----IL---EAL-SD-P--M---  |                        |     |
|                                             | <i>Pelosinus propionicus</i>                  | 090937075         | -----I--L-----HM-       | -----Q-IL--AKV---T---     | -----Q-IL--AKV---T---     |                        |     |
|                                             | <i>Oceanidesulfovibrio indonesiensis</i>      | 144303480         | -----I--L-----HM-       | -----T-----E-LGEVPK-L---  | -----T-----E-LGEVPK-L---  |                        |     |
|                                             | <i>Halanaerobium hydrogeniformans</i>         | 312143949         | -----I--L-----HM-       | -----TLH--KA-LSSC---V---  | -----TLH--KA-LSSC---V---  |                        |     |
|                                             | <i>Halanaerobium saccharolyticum</i>          | 491631366         | -----I--L-----HM-       | E-----ES-LA-VP---         | E-----ES-LA-VP---         |                        |     |
|                                             | <i>Acetivibrio cellulolyticus</i>             | 497929432         | -----I--L-----HM-       | -----QAIL--AKV---T---     | -----QAIL--AKV---T---     |                        |     |
|                                             | <i>Acetohalobium arabaticum</i>               | 302392435         | -----I--L-----HM-       | AP-----EALVSDIP--V---     | AP-----EALVSDIP--V---     |                        |     |
|                                             | <i>Clostridium phytofermentans</i>            | 160881602         | -----I--L-----HM-       | -QI---Q--ILNTVKV-I-T---   | -QI---Q--ILNTVKV-I-T---   |                        |     |
| <i>Halobacteroides halobius</i>             | 435853355                                     | -----I--L-----HM- | DQI---EALL-EE-K---I---  | DQI---EALL-EE-K---I---    |                           |                        |     |
| <i>Clostridium clariflavum</i>              | 374295865                                     | -----I--L-----HM- | KP--V--KALL-EA-K-L-T--- | KP--V--KALL-EA-K-L-T---   |                           |                        |     |
| <i>Halotheomothrix orenii</i>               | 220931740                                     | -----I--L-----HM- | -T-----QALL-ETP-V--T--- | -T-----QALL-ETP-V--T---   |                           |                        |     |
| <i>Caldicellulosiruptor saccharolyticus</i> | 146295971                                     | -----I--L-----HM- | -KI---KALL-ETPKI--T---  | -KI---KALL-ETPKI--T---    |                           |                        |     |
| <i>Persephonella marina</i>                 | 225850029                                     | -----I--L-----HM- | SPI-K--QALL-ES-K-L-I--- | SPI-K--QALL-ES-K-L-I---   |                           |                        |     |
| <i>Sulfurihydrogenibium azorense</i>        | 225849351                                     | -----I--L-----HM- | -----V-D-LVGEVPT-V-I--- | -----V-D-LVGEVPT-V-I---   |                           |                        |     |
| <i>Thermocrinis albus</i>                   | 289548704                                     | -----I--L-----HM- | -----SALL-ETPKV---T---  | -----SALL-ETPKV---T---    |                           |                        |     |
| <i>Aquifex aeolicus</i>                     | 15606299                                      | -----I--L-----HM- | -----ALL-ETPKVL-T---    | -----ALL-ETPKVL-T---      |                           |                        |     |
| <i>Sulfurihydrogenibium yellowstonense</i>  | 494812488                                     | -----I--L-----HM- | -Q-----ALL-ETPK-L---    | -Q-----ALL-ETPK-L---      |                           |                        |     |
| <i>Spirochaeta thermophila</i>              | 307719108                                     | -----I--L-----HM- | -----I-EYRVSAP-----     | -----I-EYRVSAP-----       |                           |                        |     |
| <i>Geobacter daltonii</i>                   | 222056098                                     | -----I--L-----HM- | -----Q-LL-AAPKIL-T---   | -----Q-LL-AAPKIL-T---     |                           |                        |     |
| <i>Geobacter bemidjensis</i>                | 197118679                                     | -----I--L-----HM- | -I--V--ESML-NVPK-----   | -I--V--ESML-NVPK-----     |                           |                        |     |
| <i>Pelobacter propionicus</i>               | 118580108                                     | -----I--L-----HM- | AP-----EALVSDIP--V---   | AP-----EALVSDIP--V---     |                           |                        |     |
| <i>Desulfovibrio desulfuricans</i>          | 376296380                                     | -----I--L-----HM- | A-----E-ILA-VPK---T---  | A-----E-ILA-VPK---T---    |                           |                        |     |
| <i>Anaeromyxobacter dehalogenans</i>        | 86158110                                      | -----I--L-----HM- | ---L---ETL-GDVPT-V-I--- | ---L---ETL-GDVPT-V-I---   |                           |                        |     |
| <i>Mucispirillum schaedleri</i>             | 555550898                                     | -----I--L-----HM- | -----DILL-PTPKV--T---   | -----DILL-PTPKV--T---     |                           |                        |     |
| <i>Trichoplax adhaerens</i>                 | 196018955                                     | -----I--L-----HM- | -K-----EGILSDAIEI-----  | -K-----EGILSDAIEI-----    |                           |                        |     |
| <i>Mesotoga prima</i>                       | 389844710                                     | -----I--L-----HM- | ---TLKV--KELLSATP-----  | ---TLKV--KELLSATP-----    |                           |                        |     |
| <i>Roseiflexus castenholzii</i>             | 156742130                                     | -----I--L-----HM- | -P-----QG-L-N-PMVV---   | -P-----QG-L-N-PMVV---     |                           |                        |     |
| <i>Dethiosulfovibrio peptidovorans</i>      | 491903638                                     | -----I--L-----HM- |                         |                           |                           |                        |     |
| <i>Slackia exigua</i>                       | 493405898                                     | -----I--L-----HM- |                         |                           |                           |                        |     |
| <i>Acetonema longum</i>                     | 490199933                                     | -----I--L-----HM- |                         |                           |                           |                        |     |
| <i>Dehalogenimonas lykanthroporepellens</i> | 300088125                                     | -----I--L-----HM- |                         |                           |                           |                        |     |

Figure S25

Partial sequence alignment of the protein tryptophanyl-tRNA synthetase, showing a 5 aa insert (boxed) that is found in all members belonging to the order *Chlorobiales*.

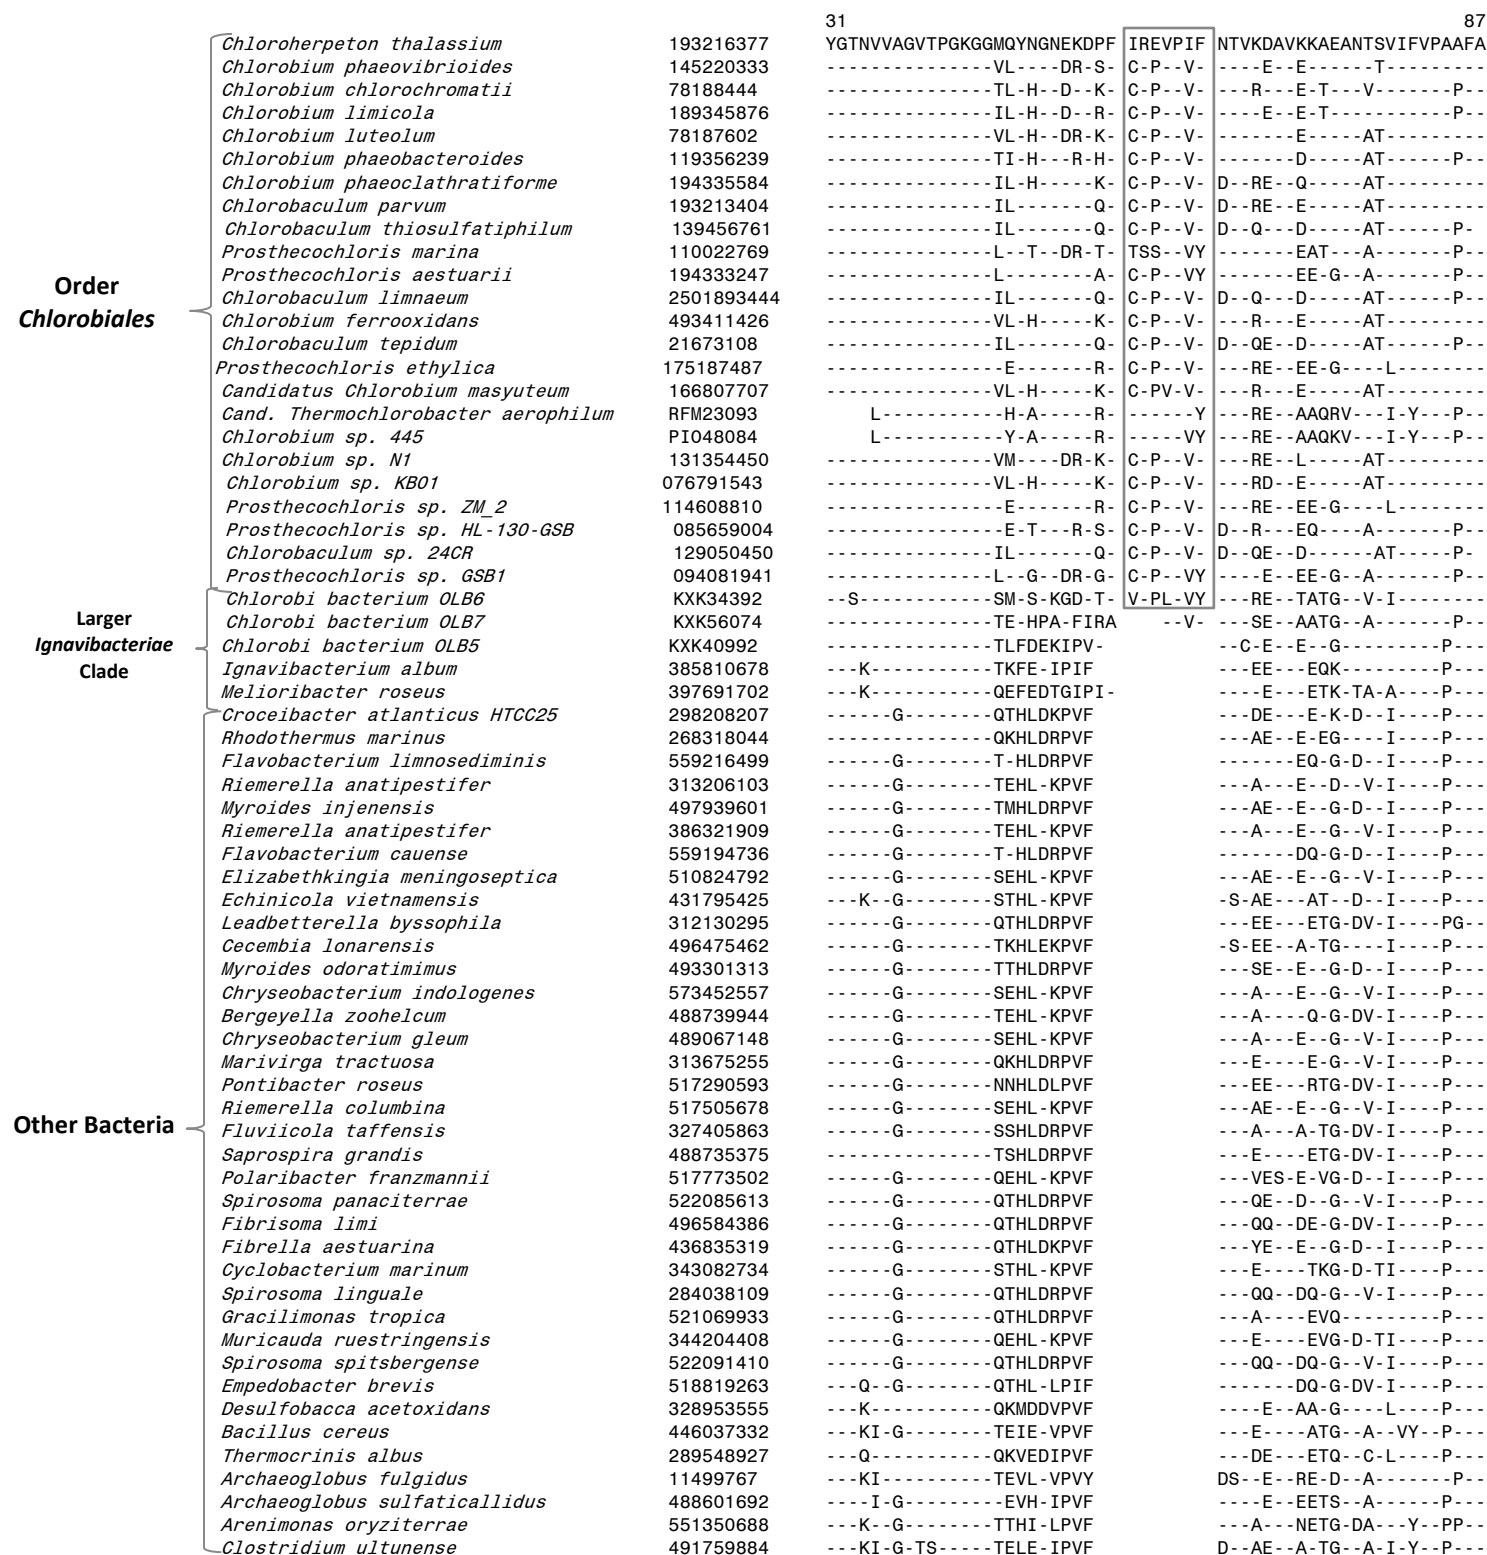

Figure S26

Partial sequence alignment of the protein succinyl-CoA synthetase subunit alpha, showing a 7 aa insert (boxed) that is found in all members belonging to the order *Chlorobiales*.

|                                           |                                              |            |                        |                             |
|-------------------------------------------|----------------------------------------------|------------|------------------------|-----------------------------|
|                                           |                                              | 2          |                        | 48                          |
| Order<br><i>Chlorobiales</i>              | <i>Chlorobaculum tepidum</i>                 | 21673819   | RIGVAGVGKLGFEHTNLLKQI  | AAEA SDVEFSGVFDLNPRLQIEIGKK |
|                                           | <i>Chlorobaculum parvum</i>                  | 193212872  | ---N                   | ---N P---L-----             |
|                                           | <i>Chlorobium phaeoclathratiforme</i>        | 194336309  | K---I-----K--TE-       | -Q-R P--HCA-L---DSN-AE-MAR- |
|                                           | <i>Chlorobium phaeobacteroides</i>           | 119356931  | ---I-T-----K--GE-      | -QNR H-T-LA-I---RI-AE--H-   |
|                                           | <i>Chlorobium phaeovibrioides</i>            | 145219610  | ---II-----K--AE-       | -N-Q PA--CA-----TA-AE-MAA-  |
|                                           | <i>Chlorobium luteolum</i>                   | 78187012   | ---I-----K--AE-        | -Q-T PG-TCA-----D-A-AR--AS- |
|                                           | <i>Chlorobium limicola</i>                   | 189346519  | ---I-T-----K--RD-      | -L-S P--HLA-IY-KSSL-AE--AH- |
|                                           | <i>Chlorobium chlorochromatii</i>            | 78188699   | K---I-----K--TEL       | -H-R T-LHVA-I---TQ-AE-MAQ-  |
|                                           | <i>Chlorobaculum thiosulfatophilum</i>       | 139455688  | -----                  | -G-S P-----                 |
|                                           | <i>Chlorobium ferrooxidans</i>               | 493411370  | Q---I-----K--TE-       | -R-L P--TCA-I---DRN-AD-MAAR |
|                                           | <i>Chloroherpeton thalassium</i>             | 193216278  | -A-I-----K--E-         | C--Q KN-HLT-----QT-AA-A--   |
|                                           | <i>Chlorobaculum limnaeum</i>                | 2501894514 | -----                  | ---S Q-----A-----           |
|                                           | <i>Candidatus Chlorobium masyuteum</i>       | 166808114  | Q---I-----K--TE-       | -R-L P--TCA-I---DRN-AD-MAAR |
|                                           | <i>Cand. Thermochlorobacter aerophilum</i>   | RFM23578   | ---IV-----L-AK--SEL    | SL-R Q-TA-I---I-A--CA-VA--  |
|                                           | <i>Candidatus Thermochlorobacteri GBCh1B</i> | KER10002   | -LA-V-----L-AK--SEL    | VR-R N-AR-V---I-GA-AD--ARR  |
|                                           | <i>Chlorobium sp. KB01</i>                   | 076791136  | Q---I-----K--TE-       | -R-L P--TCT-I---DRN-AD-MAAR |
|                                           | <i>Chlorobium sp. 445</i>                    | PI049003   | ---IV-----L-AK--REL    | SL-R K-I-V---CKET-CKDVAR-   |
|                                           | <i>Chlorobium sp. N1</i>                     | 131357401  | K---I-----K--AE-       | -R-Q PA-TCA-----D           |
|                                           | <i>Chlorobi bacterium OLB4</i>               | KXK01619   | K-SII-L-H--KI-LKI-SEL  | SN-R K-FSI---Y-IDN-K-SGIS   |
| Larger<br><i>Ignavibacteriae</i><br>Clade | <i>Ignavibacterium album</i>                 | 385809634  | KV--I--H--KL--KMF-S-   | ENC-LI--Y-A-EQTAKSVAQE      |
|                                           | <i>Melioribacter roseus</i>                  | 397691384  | K---I-T-H--RI-VK--EL   | DN--LC--Y-KDF-KSKNVSEE      |
|                                           | <i>Candidatus Hydrothermae bacter</i>        | MBP7702301 | KF-IV---H---I-VRN--S-  | V--T -QI-LT-I--V-LA-A--SER  |
|                                           | <i>Leptospira terpstrae</i>                  | 489062375  | -L--I-T-HM-QY-V-VA--L  | A-A-LI-I--A-L--ATQ-AE-      |
|                                           | <i>Leptospira wolffii</i>                    | 514354638  | K---I-T-HM-QY-V-VA-TL  | --A-LI-I--SDS--ATQ-AE-      |
| Other Bacteria                            | <i>Brachyspira pilosicoli</i>                | 404475256  | -SLI---RM-Q--L-VIN--   | NSINLK-IY-ADENH-N-VSN-      |
|                                           | <i>Brachyspira hampsonii</i>                 | 495999332  | -SLI---RM-Q--L-VVS--   | NQINL--IY-ADENH-N--S--      |
|                                           | <i>Opitutus terrae</i>                       | 182413903  | -C-----S--QH-ARIYSTL   | PN---A-I-ETSDA-AA--CA-      |
|                                           | <i>Nitrospina gracilis</i>                   | 491147715  | -A---I--M-QY-VGV-SEM   | R-IKLTHIA-V-ED-CR--SNR      |
|                                           | <i>Ureibacillus thermosphaericus</i>         | 515282761  | -V--V-T--M-F--CSK--M   | KN-N-I-IY-TDMN-AKK-S-A      |
|                                           | <i>Bacillus massiliosenegalensis</i>         | 517982370  | KV--I-T--M--N-LKNYIE-  | S DQC-VV-IY-V-ER-AS-LAS-    |
|                                           | <i>Acidithiobacillus caldus</i>              | 340781596  | -TA-V---H--R--AQKYAAC  | SNLQ---QD---AAVAAE          |
|                                           | <i>Kordia algicida</i>                       | 494153791  | KA--L-A-H--KI-LR--Q-S  | -KY-LI-FY-A--YA-K-V-E       |
|                                           | <i>Trichodesmium erythraeum</i>              | 113475581  | -V--I---NM-QH--RV-SLL  | K-T-LV--A-I-V--GLDTAS-      |
|                                           | <i>Oscillatoria formosa</i>                  | 518317616  | ---I---NM-QH--RV-SLL   | K--LV--S-I-V--GIDVAS-       |
|                                           | <i>Microcoleus vaginatus</i>                 | 493685732  | ---I---NM-QH--RV-SLL   | K-I-LV--A-I-V--GIDVAS-      |
|                                           | <i>Dactylococcopsis salina</i>               | 428779731  | -V--I---NM-QH--RV-SLL  | K--LV--S-I-V--GL-TAS-       |
|                                           | <i>Cylindrospermum stagnale</i>              | 434404788  | ---I---NM-QH--RV-SSM   | K--LV--S-I-V--GL-TAS-       |
|                                           | <i>Anabaena variabilis</i>                   | 75908580   | -V--I---NM-QH--RV-SSM  | K--LV--S-I-V--GL-TAS-       |
|                                           | <i>Raphidiopsis brookii</i>                  | 496702689  | -M--I---NM-QH-AR--SSM  | K--LV--S-I-V--GI-TASR       |
|                                           | <i>Scytonema hofmanni</i>                    | 516355105  | ---I---NM-QH-ARI-SSM   | K--LV--A-I-V--GL-TAS-       |
|                                           | <i>Peribacillus alkalitolerans</i>           | 163100509  | ---V-T--M-TY-CSK--M    | KN-D-V---KDLK-AE--SR-       |
|                                           | <i>Candidatus Nitronauta litoralis</i>       | QPJ61148   | ---I---M--Y-VGV-SEQ    | -AA-LTL-A-N-EQ-A-----R      |
|                                           | <i>Leptonema illini</i>                      | KAB2929387 | KV--I-T-HM-QY-V-VIVN-  | AQA-VT-C--AD-N--A--S-R      |
|                                           | <i>Pelagicoccus mobilis</i>                  | 200355414  | K C-----Y--QH-ARIYSEL  | EN--LA-I-ET-T--AA--SE-      |
|                                           | <i>Ruminiclostridium cellobioparum</i>       | 004630087  | KAATII-F-GM-S--AQQI--- | NSI-IT--Y-I--QKV--GV--      |
|                                           | <i>Brachyspira alvinipulli</i>               | 028330838  | -SLI---RM-Q--L-VIN--   | NQINL--IY-E-KNH-D--SQ-      |
|                                           | <i>Calothrix brevissima</i>                  | 096642204  | R ---I---NM-QH--RV-SSM | K--LV--S-I-V--GL-TAS-       |
|                                           | <i>Anabaenopsis elenkinii</i>                | 200988229  | R V--I---NM-QH-ARI-SSM | K--LV--S-I-V--GL-TAS-       |
|                                           | <i>Nitrospina gracilis</i>                   | 005006113  | -A---I--M-QY-VGV-SEM   | R-IKLTHIA-V-ED-CR--SNR      |
|                                           | <i>Thermodesulfobacterium commune</i>        | 038060646  | -V-II-I-H--R--AEK-A--  | DKADLVALV-I---V--AV--       |
|                                           | <i>Leptospira ryugenii</i>                   | 108977756  | -L--I-T-HM-QY-V-VA-ML  | --ATLE-I--AST--ASQ-AE-      |
|                                           | <i>Cuspidothrix issatschenkoi</i>            | 104386150  | R ---I---NM-QH--RV-SSM | K--LV--S-I-V--GL-TAS-       |
|                                           | <i>Cylindrospermum stagnale</i>              | 015208246  | R ---I---NM-QH--RV-SSM | K--LV--S-I-V--GL-TAS-       |
|                                           | <i>Brachyspira hampsonii</i>                 | 008728832  | -SLI---RM-Q--L-VVS--   | NQINL--IY-ADENH-N--S--      |

Figure S27

Partial sequence alignment of the protein GfoIdh/MocA family oxidoreductase, showing a 4 aa insert (boxed) that is found in all members belonging to the order *Chlorobiales*.

|  |                                                |                       |                        |
|--|------------------------------------------------|-----------------------|------------------------|
|  |                                                | 209                   | 249                    |
|  | <i>Chlorobaculum tepidum</i>                   | ANVTASRLSRSLRKMRFTRN  | PK SYASLDFTSGKSEVFRL   |
|  | <i>Chlorobaculum parvum</i>                    | -----L---S-K          | -----N-----            |
|  | <i>Chlorobium chlorochromatii</i>              | -----M--L---CTE       | -----L-----IY--        |
|  | <i>Chlorobium ferrooxidans</i>                 | -----RM--L---GT-      | -----L-T-----          |
|  | <i>Chlorobium limicola</i>                     | -----NRY---CNE        | -----L-----            |
|  | <i>Chlorobium phaeoclathratiforme</i>          | -----NRM--L---CND     | -----L-T-----          |
|  | <i>Chlorobium phaeobacteroides</i>             | -----KSM--L---CND     | -----L-T-----          |
|  | <i>Chlorobium phaeovibrioides</i>              | -----CRQ--L---GTD     | -----L-T-----          |
|  | <i>Chlorobium luteolum</i>                     | -----RS--L---GTA      | -----L-T-----          |
|  | <i>Chloroherpeton thalassium</i>               | ---S---I--T-S--V--SK- | -N-----L-N---I--I      |
|  | <i>Chlorobaculum limnaeum</i>                  | -----S--              | -----                  |
|  | <i>Chlorobaculum thiosulfatophilum</i>         | -----S--              | -----                  |
|  | <i>Candidatus Chlorobium masyuteum</i>         | -----RM--L---GT-      | -----L-T-----          |
|  | <i>Cand. Thermochlorobacter aerophilum</i>     | -T----I--TRV-----CK-  | -P-----LM-----         |
|  | <i>Cand. Thermochlorobacteriaceae GBCh1B</i>   | -T----I--T-V---L-CAD  | -N-----L-T--A-----     |
|  | <i>Chlorobium</i> sp. 445                      | -T----I--TRV-----CK-  | -Q-----LIT-----        |
|  | <i>Chlorobaculum</i> sp. 24CR                  | 129051696             | -----S-K-----          |
|  | <i>Chlorobium</i> sp. KB01                     | 076791136             | -----RM--L---GT-       |
|  | <i>Chlorobium</i> sp. N1                       | 131357401             | -----RS--L---GT-       |
|  | <i>Chlorobi bacterium OLB4</i>                 | KXK01619              | -----I-Q--M---I-QK-    |
|  | <i>Chlorobi bacterium OLB7</i>                 | KXK54677              | --I---I-QRPM--L-M-Q-D  |
|  | <i>Chlorobi bacterium NICIL-2</i>              | KXB98010              | --L---TPKP--L-L-QPM    |
|  | <i>Chlorobi bacterium OLB6</i>                 | KXK35631              | --L---I-AKPM--L-L-QNE  |
|  | <i>Ignavibacterium album</i>                   | 385809634             | -----I-QK-M---I-QKD    |
|  | <i>Melioribacter roseus</i>                    | 397691384             | -----I-QKRM---M-QQD    |
|  | <i>Niastella koreensis</i>                     | 375147951             | --L-S--I-MK-M---V-QKD  |
|  | <i>Empedobacter brevis</i>                     | 518819185             | V--ST--M-MKNM---V-Q--  |
|  | <i>Haliscomenobacter hydrossis</i>             | 332663296             | --L---I-MKQM--V---Q-D  |
|  | <i>Lewinella persica</i>                       | 522055502             | --L---I-LKNM--V-L-QPD  |
|  | <i>Gramella forsetii</i>                       | 120435026             | --L---I-MKNM--S---Q-D  |
|  | <i>Leeuwenhoekiella blandensis</i>             | 497466201             | --L---I-MK-M--A---Q-D  |
|  | <i>Formosa agariphila</i>                      | 537742421             | --L---I-LKSM--T---Q-D  |
|  | <i>Chitinophaga pinensis</i>                   | 256420576             | --L-S--I-LK-M---L-QKD  |
|  | <i>Weeksella virosa</i>                        | 325954811             | V-IST--M-LKNM---V-Q--  |
|  | <i>Flavobacterium rivuli</i>                   | 519055416             | --L---I-MKNM--S---QKD  |
|  | <i>Candidatus Chrysopegis kryptomonas</i>      | 092348819             | -----I--KNE---I-QK-    |
|  | <i>Candidatus Kryptobacter tengchongensis</i>  | 072149809             | -----I--KNE---I-Q-D    |
|  | <i>Candidatus Kryptonium thompsonii</i>        | 047133254             | --I---I--KNE---I-QKD   |
|  | <i>Caldithrix abyssi</i>                       | HED11325              | -----I-AK-M---V-QK-    |
|  | <i>Caldithrix abyssi</i>                       | HHJ53862              | --L---I-AK-M---L-QKD   |
|  | <i>Nonlabens xiamenensis</i>                   | 124980683             | --L---I-LK-M--A---Q-D  |
|  | <i>Leeuwenhoekiella blandensis</i>             | 009780399             | --L---I-MK-M--A---Q-D  |
|  | <i>Leeuwenhoekiella nanhaiensis</i>            | 099646996             | --L---I-MK-M--A---Q-D  |
|  | <i>Taibaiaella lutea</i>                       | 150030949             | --L---I-LK-M---L-Q-D   |
|  | <i>Gemmatimonas groenlandica</i>               | 171224539             | --I---V--ER---L-I-Q-S  |
|  | <i>Luteitalea pratensis</i>                    | AMY11198              | -----I--DRV--V--IEPA   |
|  | <i>Owenweeksia hongkongensis</i>               | 375011569             | --L---I-LKNM--T-I-Q-D  |
|  | <i>Zunongwangia profunda</i>                   | 295135065             | --L---I-MKNM--S---Q-D  |
|  | <i>Capnocytophaga cynodegmi</i>                | 517090214             | --L---I-LKNM--S---QKD  |
|  | <i>Psychroflexus tropicus</i>                  | 517867825             | --L---I-LKNM--S---Q-D  |
|  | <i>Bizionia argentinensis</i>                  | 495914711             | --L---I-LKNM--T---Q-D  |
|  | <i>Flavobacterium frigidis</i>                 | 494229777             | --L---I-MKNM--T---QKD  |
|  | <i>Lewinella cohaerens</i>                     | 522022900             | --L---I-LKQM--V---QKD  |
|  | <i>Niabella soli</i>                           | 495859222             | --L-S--I-MK-M---L-QKD  |
|  | <i>Zhouia amylolytica</i>                      | 568804158             | --L---I-LKNM--S---Q-D  |
|  | <i>Bergeyella zoohelcum</i>                    | 488740381             | --L-T--I-MKAM--S---QKD |
|  | <i>Elizabethkingia meningoseptica</i>          | 510825000             | --L-T--I-MKAM--S---QKD |
|  | <i>Nonlabens dokdonensis</i>                   | 443244512             | --L---I-LK-M--A---QKD  |
|  | <i>Polaribacter franzmannii</i>                | 517771826             | --L---I-MKNM--T---QKD  |
|  | <i>Croceibacter atlanticus</i>                 | 298208473             | --L---I-LKNM--A---QKD  |
|  | <i>Riemerella anatipestifer</i>                | 407452326             | --L-T--I-MKAM--S---QKD |
|  | <i>Ornithobacterium rhinotracheale</i>         | 392389643             | --I-T--I-MKNM---I-QKD  |
|  | <i>Caldithrix abyssi</i>                       | 493985549             | --L---I-AK-M---I-QKD   |
|  | <i>Singulisphaera acidiphila</i>               | 430746299             | --L---A-FQAM---LWSAE   |
|  | <i>Marinimicrobia bacterium</i>                | 551209323             | --L---V-AKQM-R--I-Q-D  |
|  | <i>Nitrosococcus oceanii</i>                   | 77165232              | -----V-MKAQ---V-QQD    |
|  | <i>Thioalkalivibrio thiocyanodenitrificans</i> | 517042302             | ---S--V-MKTE---I-QQ-   |
|  | <i>Nitrosococcus halophilus</i>                | 292491337             | -----V-MKAQ---I-QQD    |
|  |                                                |                       | A-I-I--VDNST-I-S-      |
|  |                                                |                       | --I---AKPSV-I--I       |
|  |                                                |                       | A-M---SVPDL--Y-I       |
|  |                                                |                       | --I-I-LAQSTA-M---      |
|  |                                                |                       | N-L---VT-V---Y--       |
|  |                                                |                       | T-F-V--IE-S--II--      |
|  |                                                |                       | A-IGI--LNK---I-IK-     |
|  |                                                |                       | A-I-I--LAK-T-I-IKM     |
|  |                                                |                       | A-I---LEKNAQ-V--       |
|  |                                                |                       | A-I---LLEKE-QIV--      |
|  |                                                |                       | A-I-V--LEK-C--VKM      |
|  |                                                |                       | A-I-V--LEK-C--V-M      |
|  |                                                |                       | A-I-V--LEK-C--VKM      |
|  |                                                |                       | A-IGI--LDK-T-I-IK-     |
|  |                                                |                       | A-I-I--LNK-T-I-IKM     |
|  |                                                |                       | A-I-V--LDKVC--VKM      |
|  |                                                |                       | A-I-I--LQ-IA-I---      |
|  |                                                |                       | A-I-I--LQ-VA-I---      |
|  |                                                |                       | A-I-I--LQ-IT-I---      |
|  |                                                |                       | A-I-F--SD-EA-A-        |
|  |                                                |                       | A-I-M--ND-L--I-Y-      |
|  |                                                |                       | A-I-V--L-K-V--V-M      |
|  |                                                |                       | A-I-V--LEK-C--V-M      |
|  |                                                |                       | A-I-V--LEK-C--V-M      |
|  |                                                |                       | A-IGI--LDK-T-II--      |
|  |                                                |                       | G-I---LAA-TG-F--       |
|  |                                                |                       | A-V-V-YA-REL--W--      |
|  |                                                |                       | A-VTI--LEKS---I-M      |
|  |                                                |                       | A-I-V--LEK-C--VKM      |
|  |                                                |                       | A-I-V--LYK-V--V-M      |
|  |                                                |                       | A-V-V--LEKHT--VKM      |
|  |                                                |                       | A-I-V--LEK-C--VKM      |
|  |                                                |                       | A-I-V--LEK-C--VKM      |
|  |                                                |                       | A-I---LLEKQAQLI--      |
|  |                                                |                       | A-IGI--LNK-T-I-IK-     |
|  |                                                |                       | A-I-I--LEK-V--VKM      |
|  |                                                |                       | A-I-V--LEK-A--I-M      |
|  |                                                |                       | A-I-I--LEK-A--I-M      |
|  |                                                |                       | A-I-V--LTK-V--V-M      |
|  |                                                |                       | A-I-VN-L-KE--V-M       |
|  |                                                |                       | A-I-V--LTK-C--VKM      |
|  |                                                |                       | A-I-V--LEK-A--I-M      |
|  |                                                |                       | A-I-V--LEK---II-M      |
|  |                                                |                       | A-I-M--NE-Y--I-Y-      |
|  |                                                |                       | G--M---MTKQGTIV-K      |
|  |                                                |                       | A-F-I--LKNST-IY--      |
|  |                                                |                       | A-I-I--QDKVLS-Y-K      |
|  |                                                |                       | A-I-V--QNRGLA-H-V      |
|  |                                                |                       | A-I-I--QDKILSIY-K      |

Figure S28

Partial sequence alignment of the protein Gfo/Idh/MocA family oxidoreductase, showing a 2 aa insert (boxed) that is found in all members belonging to the order *Chlorobiales*.

|                                  |                                        |                                |                     |                        |                         |
|----------------------------------|----------------------------------------|--------------------------------|---------------------|------------------------|-------------------------|
| Order<br><i>Chlorobiales</i>     | <i>Chlorobaculum parvum</i>            | 193213033                      | GQSLHGDVEVELVTKVPET | YVSKQSP                | HQRCEGLIVNVSRKLTITVGT   |
|                                  | <i>Chlorobium tepidum</i>              | 21673344                       | -----L-Q---Q-----S  | -A-R---                | -----V---IE-R-V-V---    |
|                                  | <i>Chlorobium phaeobacteroides</i>     | 119357755                      | NS-M-----Q-----     | -A--ST-                | -----IVKS--K-RV-----    |
|                                  | <i>Prosthecochloris aestuarii</i>      | 194333503                      | SDAI---D-----Q-     | -QTQ---                | -----K-----RSV---       |
|                                  | <i>Chlorobium limicola</i>             | 189346025                      | NSAI---I-V-----     | -SA-ST-                | -----IV---T---ISA---    |
|                                  | <i>Chlorobium phaeovibrioides</i>      | 145219389                      | NSAI-----A--SS      | -S-RST-                | -----T-IIN-RI-----      |
|                                  | <i>Chlorobium luteolum</i>             | 78186405                       | NSAI-----LT----K-   | -S-RST-                | -----MVTKIIQ--VS-----   |
|                                  | <i>Pelodictyon phaeoclathratiforme</i> | 194336956                      | -L-I-----S---D-     | -S--ST-                | -----AVQK-LT-RI-----    |
|                                  | <i>Chlorobium ferrooxidans</i>         | 493409164                      | NF-I-----D-         | -S--ST-                | -----VQK-I--RI-----     |
|                                  | <i>Chlorobium chlorochromatii</i>      | 78188726                       | -AA-----SST-        | -TA-A--                | -----VVQR-IN-H--M----   |
|                                  | <i>Chloroherpeton thalassium</i>       | 193216324                      | NGA-D--I---R--S--S- | -S-RST-                | -E---V-TQ-QK-VRQEF--V   |
|                                  | <i>Chlorobaculum limnaeum</i>          | 2501894184                     | -EA-L-----          | -----R-                | -----V-----             |
|                                  | <i>Prosthecochloris marina</i>         | 110024153                      | -DAI-----K-         | -Q-Q-T-                | -----TK-IN-A-H-----     |
|                                  | <i>Prosthecochloris ethylica</i>       | 198911867                      | AI-R--D-----P-      | -Q-Q---                | -----VTA-RQ-N--SVI--    |
|                                  | <i>Chlorobaculum thiosulfatiphilum</i> | 170181222                      | -A--L-QI-----       | -----R-                | -----V---IE-R-A-V---    |
|                                  | <i>Candidatus Chlorobium masyuteum</i> | 166807966                      | -I-----D-           | -S--ST-                | -----VQR-I--RI-----     |
|                                  | <i>Chlorobium</i> sp. N1               | 131358104                      | AI-----LT----K-     | -STRST-                | -----A-TRIIQ--VSV----   |
|                                  | <i>Chlorobium</i> sp. KB01             | 076791152                      | -I-----D-           | -S--ST-                | -----VQK-I--RI-----     |
|                                  | <i>Chlorobaculum</i> sp. 24CR          | 167599335                      | -----               | -----R-                | -----V-----             |
|                                  | Ignavibacteriae                        | <i>Prosthecochloris</i> sp. ZM | 114617576           | AI--D-----Q-           | -QTQ---                 |
| <i>Prosthecochloris</i> sp. ZM_2 |                                        | 114608494                      | AI-R--D-----P-      | -Q-Q---                | -----VTA-RQ-NM-SVI--    |
| Other Bacteria                   | <i>Prosthecochloris</i> sp. HL-130-GSB | 085659969                      | AI-K--Q-----P-      | -Q-Q---                | -----VVTA-IE-RIQS----   |
|                                  | <i>Prosthecochloris</i> sp. GSB1       | 094082062                      | -G-V-----V--T--K-   | -R-QVT-                | -----V-K--N-S-HSV---    |
|                                  | <i>Ignavibacterium album</i>           | 385809169                      | -TAFD--K---ILFAKQKG |                        | RNL--Q---L---RKEY--I    |
|                                  | <i>Coprococcus comes</i>               | 547810973                      | NGAMQ-----VI--A--G  |                        | K-R--K-TKI-Q-GTOR---Y   |
|                                  | <i>Dorea formicigenerans</i>           | 491476797                      | -GA-D--T---II--ASDR |                        | DGK-R--K--KI-E-G---V--L |
|                                  | <i>Ruminococcus gnavus</i>             | 547306355                      | NGAFQ-----F-I--S--G |                        | R-K--K--R---HGT-KVI-L   |
|                                  | <i>Ruminococcus lactaris</i>           | 491807899                      | NGAFQ-----CII-GS-SG |                        | R-Q--K--GII-HQV-KV--L   |
|                                  | <i>Brevibacillus borstelensis</i>      | 489487643                      | NGA---T-L-RME-ISGG  |                        | N-A--R-IR--E-GI-EV---   |
|                                  | <i>Bacillus methanolicus</i>           | 489446679                      | NNAM---T-L-RISTESSG |                        | --R-TV-R-IE-GTQQ----    |
|                                  | <i>Brevibacillus brevis</i>            | 515820898                      | NGA---T-F-R-E-EAGG  |                        | N-L--Q-IRI-E-GIKQV---   |
|                                  | <i>Capnocytophaga granulosa</i>        | 512458271                      | NKA---L--Y-FPRRRE   |                        | KL--E-TQ-IE--R--F--L    |
|                                  | <i>Gillisia limnaea</i>                | 494046916                      | NKA-N-----IYIYNKRNK |                        | RKS--EV-KIIK--R-EF--I   |
|                                  | <i>Salinibacter ruber</i>              | 83815922                       | -EA---L-R-A-AARAPE  |                        | DKKR-CEVLE--E-RC-EV--   |
|                                  | <i>Capnocytophaga gingivalis</i>       | 488743213                      | NKA---V---Y-FPRRRE  |                        | KL--E-TQIIE--R--F--V    |
|                                  | <i>Pedobacter heparinus</i>            | 255531532                      | HNA---K-K-YIYAKKSG  |                        | RKN--EV-EIIE-SK-DFI-V   |
|                                  | <i>Mucilaginibacter paludis</i>        | 495785702                      | RNA---R-K-Y-YAKSKG  |                        | K-K--EVIEIIE-AKMEFT-I   |
|                                  | <i>Joostella marina</i>                | 495886911                      | NKA---L---Y-FPRRRK  |                        | GKKI--E-TKILE--K--F--I  |
|                                  | <i>Muricauda ruestringensis</i>        | 344202636                      | NRAF---T---FIKPKRKS |                        | KKM--EVSK-LE--K-SY--I   |
|                                  | <i>Veillonella parvula</i>             | 544718202                      | -TAM-N-K-R-RIVPSDY- |                        | KHKR--I--D-IE-ANE-----  |
|                                  | <i>Dorea formicigenerans</i>           | 117980906                      | -GA-D--T---II--ASD  |                        | RDGK-R--K--KI-E-G---V-- |
|                                  | <i>Candidatus Blautia avicola</i>      | HJD28867                       | -GAF---Q-QI-LK-EER  |                        | -GK-R--RV-KILE-GMEE---  |
|                                  | <i>Veillonella dispar</i>              | MBF1741846                     | -TAM-N-K-R-R-IPSNY  |                        | TKHKR--I---IE-ANE-V--   |
|                                  | <i>Blautia faecis</i>                  | 148463538                      | -TAM-Q-K-R-II--E-Q  |                        | EGK-R--IV-K-LE-GM-Q---  |
|                                  | <i>Hespellia stercorisuis</i>          | 084533899                      | AFQ--K--I--S--      |                        | ER-K--K--KILE-GT--L--   |
|                                  | <i>Zhouia amylolytica</i>              | 038268184                      | KA-----Y-FPRRR      |                        | GSK-L--E-TK-IN--R--F--  |
| <i>Veillonella dispar</i>        | 566235315                              | -TAM-N-K-R-RIVPSDY-            |                     | KHKR--I--D-IE-ANE----- |                         |

Figure S29

Partial sequence alignment of the protein ribonuclease R, showing a 7-8 aa insert (boxed) that is found in all members belonging to the order *Chlorobiales*.

|                              |                                            |            |                                                       |
|------------------------------|--------------------------------------------|------------|-------------------------------------------------------|
|                              |                                            | 558        | 608                                                   |
| Order<br><i>Chlorobiales</i> | <i>Prosthecochloris aestuarii</i>          | 194333503  | KVAILANFVKKIGYTLQLTGKG KNGAP VVKAKALRDLLKQVHGTNVEFLVN |
|                              | <i>Chlorobium phaeobacteroides</i>         | 189499728  | -----T---RR-----K-D--A -G--- K-SSQ---N-----           |
|                              | <i>Chlorobaculum parvum</i>                | 193213033  | R-QV-----R---FD-K-DR-- -DS A T-SSR---E--QK-----       |
|                              | <i>Chlorobaculum tepidum</i>               | 21673344   | --QV--S--R---FD-K-DR-- -DS A T-SS---E--QK-R-----      |
|                              | <i>Chloroherpeton thalassium</i>           | 193216324  | RIVQ-SE--T-L-FK-E-KKNA L-N - T-SS-G--S--E--K-S---I--- |
|                              | <i>Chlorobium luteolum</i>                 | 78186405   | R-I-----D-KIN -- -D- - I-S--S--E--QK-----             |
|                              | <i>Chlorobium phaeovibrioides</i>          | 145219389  | R-T-----M--E-K-N -- -D- - I-S---E--QK-R-S-----        |
|                              | <i>Chlorobium limicola</i>                 | 189346025  | R-LV-----R-----KIN RE -T- - I-S---Q--Q---S-----       |
|                              | <i>Chlorobium ferrooxidans</i>             | 493409164  | --I--S---RF-FD-K-N R- -E- - I-T----Q--Q--K-----S      |
|                              | <i>Prosthecochloris marina</i>             | 110024153  | --G-----R---S---N--- -G-V- KISS-----M--               |
|                              | <i>Chlorobaculum thiosulfatophilum</i>     | TNJ39330   | R-TV-----R---FD-K-DR-- -ES- T-S---E--QK-----          |
|                              | <i>Prosthecochloris ethylica</i>           | 198911867  | --G-----R---Q---D--S -N-TS---QG-----S-----            |
|                              | <i>Chlorobium phaeoclathratiforme</i>      | 194336956  | -L-----RL-FD-K-N R- -E- - I-S-S---Q--Q--K-S-I---S     |
|                              | <i>Chlorobium chlorochromatii</i>          | 78188726   | --VMV---RL--D-KIN RS -E-I I-S-QS--Q--Q--K-----S       |
|                              | <i>Chlorobaculum limnaeum</i>              | 2501894184 | R-TV-----R---FE-K-DR-- -ES- T-SS-S--E--QK-----        |
|                              | <i>Cand. Thermochlorobacter aerophilum</i> | RFM24073   | -IKT--A--RL--E-E-KKNA F-N E TATSQ---K--AD-K--S--Y--S  |
|                              | <i>Chlorobium sp. N1</i>                   | 131358104  | R-IV-----E-K-NKGK EGP I-T-----E--QK-S-----            |
|                              | <i>Prosthecochloris sp. ZM</i>             | 114617576  | -----G-----R---N---D--S -K-G- T-TS-----               |
|                              | <i>Prosthecochloris sp. GSB1</i>           | 094082062  | --G-----R---Q---D--S -N-TS---QG-----S-----            |
|                              | <i>Prosthecochloris sp. ZM_2</i>           | 114608494  | R-QV-----FD-K-DR-- -ES- T-SS---E--QK-----             |
|                              | <i>Chlorobaculum parvum</i>                | HHE33015   | R-QV-S--R---FD-K-DRR- -ES- T-SSR---E--QK-R-----       |
|                              | <i>Chlorobaculum sp. 24CR</i>              | RXK82182   | --I--S---RF-FD-K-NRGK EG P I-T-----Q--Q--K-----S      |
|                              | <i>Chlorobium sp. KB01</i>                 | 076791152  | -IMEFVR--SL--QVSNLIK -TSEFQK--D--K-KEE-P-I-           |
| <i>Ignavibacteriae</i>       | <i>Ignavibacterium album</i>               | 385809169  | -INEF-R--SL--SFDPAAN -PMEFQK--DAAK-SEE-AVI-           |
|                              | <i>Melioribacter roseus</i>                | 397690865  | -IRQ--QV-RVF--H-E--ED- T-SS---NE--QH-K--PE-PVLE       |
|                              | <i>Rhodothermus marinus</i>                | 345303465  | RLGTF---A--F-HEVKIDDEQ KVS---NK--DEIQ-KPEQNVLE        |
|                              | <i>Rhodoneillum psychrophilum</i>          | 518430380  | -L-D--E--GRL--K-RT--TP EMI---N---EK--KPEAE-IE         |
|                              | <i>Porphyromonas levii</i>                 | 517169631  | -YESFSK--R-F-FEAAPKQSE TISSS-NRV-GE-Q-KKQONI-E        |
|                              | <i>Marinilabilia salmonicolor</i>          | 498351409  | -MEN-SE-IRRF--KIKVD-SK TNVS-SINH--DE-S-KPE-N-IS       |
|                              | <i>Dysgonomonas gadei</i>                  | 493853178  | -MKN-SE-IRRF--KIKVD-TK TNVS--INH--DE-S-KPE-N-IS       |
|                              | <i>Dysgonomonas mossii</i>                 | 493896130  | -L-GI-EQ--P--IKFDVEKNI SP-KIN--GK-EN-SL-YI--          |
|                              | <i>Gracilimonas tropica</i>                | 521070004  | -IKN-KQL-RSF--K-NIKRIN NETS-NISS-F---Q--REQN-IE       |
|                              | <i>Candidatus Azobacteroides</i>           | 212550560  | RLETFS--A--F-HEIKVGEKN RIS---NQ-MDEIQ-KPEQNVLE        |
|                              | <i>Belliella baltica</i>                   | 390945305  | -LML-QGVIS-F--SIDMKS-K AVTSS-NA--EE-Q--KEQN--D        |
|                              | <i>Joostella marina</i>                    | 495886911  | -FETFSR--R-F-LEAKPK-QE TISHS-NR--DK-Q-QKHQNI-E        |
|                              | <i>Thermophagus xiamenensis</i>            | 498212010  | RLETFT-A--F-HD-KISEGA KIS---NQ-MDEIV-KPEQNVLE         |
|                              | <i>Mariniradius saccharolyticus</i>        | 495907092  | RLETFT---A--F-HEVSI-EAT RVSAT-NK-MGEIE-KPEQN-LE       |
|                              | <i>Echinicola vietnamensis</i>             | 431796052  | -LQNF---AGRF-FSIRTDSDK SLSNSMNMKMMSE-E--P-QNVLE       |
|                              | <i>Emticicia oligotrophica</i>             | 408673906  | -YETFSK--R-L-FEAMPK-RE TISHS-NR--DE-Q-KKQONI-E        |
| Other Bacteria               | <i>Anaerophaga thermohalophila</i>         | 515148300  | -L-S-KQ-IHQF--K-E-GDRK KTTASINQ--HD-K-KGE-NMIE        |
|                              | <i>Ornithobacterium rhinotracheale</i>     | 392390324  | -L-Q-RS--MRF--QMKSDAV- KAL--DINK-MTN--KQE-N-IS        |
|                              | <i>Alistipes indistinctus</i>              | 496424899  | RLQNF-EY-GRL--KFIY--DA QSIDSN-NK--EEIK-KPE-NVIQ       |
|                              | <i>Porphyromonas benzonis</i>              | 516799870  | RLMD-S---QF--QVDTKNRN GISRS-NKM-SD-K-KGEANMIE         |
|                              | <i>Owenweeksia hongkongensis</i>           | 375012907  | RLQTF---A-L-LK-EVEEES KI--SMNAM-AK-E-KPEQN-IE         |
|                              | <i>Dyadobacter beijingensis</i>            | 518787359  | -L-GI-GQ-APL-IKFEVRD-I TP-YINN--QK-KE-P--MI--         |
|                              | <i>Balneola vulgaris</i>                   | 516842897  | -LMA-NGVISRF-HSIN-KDPK SINQS-NK--ED-K-KKEQN--D        |
|                              | <i>Muricauda ruestringensis</i>            | 344202636  | RMIQFKE-IHNF--E-KGIKN -HPRS-QAI-EE-R-SKE-KIIE         |
|                              | <i>Halanaerobium hydrogeniformans</i>      | 312143213  | -IRA--T-INNF-FSMHIGANE -RP-EIQK--GK-E--PQ-A-IS        |
|                              | <i>Dorea formicigenerans</i>               | 491479248  | -ISE-NSYLRLP--VINYDE-V EPVDVQKV-EKAK--KE-MFIS         |
|                              | <i>Peptoniphilus rhinitidis</i>            | 497928569  | -LQV-KT--ANF-LN-P-KNGE -TPREIQK--LR-E--ET-D--S        |
|                              | <i>Stomatobaculum longum</i>               | 497218087  | RLEA-RS-LQT-NLN-PTGALR PQNFNTVISK-R--SQ-H---          |
|                              | <i>Novispirillum itersonii</i>             | 518473365  | -QE--R--LQSL-IS-SKSAEL TSAR-NRI-EK-AH-EQQE---         |
|                              | <i>Bartonella elizabethae</i>              | 492187130  | -QE--RT-LQSL-IS-SKSAEL TSAR-NKI-EK-AH-EQQE---         |
|                              | <i>Bartonella tribocorum</i>               | 163868292  |                                                       |

Figure S30

Partial sequence alignment of the protein ribonuclease R, showing a 4-5 aa insert (boxed) that is found in all members belonging to the order *Chlorobiales*.

|                                           |                                            | 640        | 720                  |
|-------------------------------------------|--------------------------------------------|------------|----------------------|
| Order<br><i>Chlorobiales</i>              | <i>Chlorobaculum parvum</i>                | 193213033  | HFTSPIRRYPDLVIHRLFEY |
|                                           | <i>Chlorobaculum tepidum</i>               | 21673344   | -----IV-----         |
|                                           | <i>Chlorobium phaeovibrioides</i>          | 145219389  | -----IV-M-----       |
|                                           | <i>Chlorobium ferrooxidans</i>             | 493409164  | -----IV-L-----       |
|                                           | <i>Chlorobium phaeoclathratiforme</i>      | 194336956  | -----IV-M-----       |
|                                           | <i>Chlorobium luteolum</i>                 | 78186405   | -----IV-L-----       |
|                                           | <i>Chlorobium chlorochromatii</i>          | 78188726   | -----L-M-----        |
|                                           | <i>Prosthecochloris aestuarii</i>          | 194333503  | -----V-L-----        |
|                                           | <i>Chlorobium limicola</i>                 | 189346025  | -----IV-L-----       |
|                                           | <i>Prosthecochloris ethylica</i>           | NUK48115   | -----IV-L-----       |
|                                           | <i>Chlorobium phaeobacteroides</i>         | 189499728  | -----MV-L-----       |
|                                           | <i>Chloroherpeton thalassium</i>           | 193216324  | -----IV-L-Y-----     |
|                                           | <i>Chlorobaculum limnaeum</i>              | 2501894184 | -----IV-L-----       |
|                                           | <i>Prosthecochloris marina</i>             | 110024153  | -----V-L-----        |
|                                           | <i>Chlorobaculum thiosulfatiphilum</i>     | TNJ39330   | -----IV-L-----       |
|                                           | <i>Cand. Thermochlorobacter aerophilum</i> | RFM24073   | -----T-L-Y-----      |
|                                           | <i>Candidatus Chlorobium masyuteum</i>     | 166807966  | -----IV-L-----       |
|                                           | <i>Chlorobium sp. N1</i>                   | 131358104  | -----LV-M-----       |
|                                           | <i>Chlorobium sp. KB01</i>                 | 076791152  | -----IV-L-----       |
|                                           | <i>Chlorobaculum sp. 24CR</i>              | RXK82182   | -----IV-L-----       |
|                                           | <i>Prosthecochloris sp. HL-130-GSB</i>     | 085659969  | -----S-V-L-----      |
|                                           | <i>Prosthecochloris sp. GSB1</i>           | 094082062  | -----IV-L-----       |
|                                           | <i>Prosthecochloris sp. ZM_2</i>           | 114608494  | -----IV-L-----       |
| Larger<br><i>Ignavibacteriae</i><br>Clade | <i>Chlorobi bacterium NICIL-2</i>          | KXB97643   | -----V-L-K-----      |
|                                           | <i>Chlorobi bacterium OLB7</i>             | KXK55686   | -----IV-M-A-----     |
|                                           | <i>Chlorobi bacterium OLB5</i>             | KXK52504   | -----IV-L-----       |
|                                           | <i>Ignavibacterium album</i>               | 385809169  | -----S-LV-L-K-----   |
|                                           | <i>Dorea longicatena</i>                   | 548195207  | -----Q-----IKDN      |
|                                           | <i>Bacteroides dorei</i>                   | 547774176  | -----F-MMV-L-TR----- |
|                                           | <i>Megamonas hypermegale</i>               | 479207615  | -----IV-L-K-Q-----   |
|                                           | <i>Tepidanaerobacter syntrophicus</i>      | 059033581  | -----A-----E-----R-L |
|                                           | <i>Megamonas funiformis</i>                | 225091553  | -----IV-L-K-Q-----   |
|                                           | <i>Moorella mulderi</i>                    | KYH31529   | -----V-----R-T       |
| Other Bacteria                            | <i>Biomaibacter acetigenes</i>             | 122015104  | -----M-----IR-H      |
|                                           | <i>Aneurinibacillus aneurinilyticus</i>    | ERI11065   | -----IV-MIR-S-----   |
|                                           | <i>Megamonas hypermegale</i>               | CBL07268   | -----IV-L-K-Q-----   |
|                                           | <i>Alicyclobacillus mali</i>               | 206885292  | -----A-----IR-V      |
|                                           | <i>Thermovenabulum gondwanense</i>         | 068747371  | -----I-----R-Q       |
|                                           | <i>Moorella stamsii</i>                    | PRR71716   | -----V-----R-T       |
|                                           | <i>Alicyclobacillus mali</i>               | 206881148  | -----A-----IR-V      |
|                                           | <i>Peptococcaceae bacterium</i>            | MBU7006244 | -----IK-N-----       |
|                                           | <i>Paludifilum halophilum</i>              | OYD08178   | -----I-----IW-V      |
|                                           | <i>Aneurinibacillus migulanus</i>          | KIV50047   | -----IV-MIR-S-----   |
|                                           | <i>Laceyella tengchongensis</i>            | 154987632  | -----L-----VIR-I     |
|                                           | <i>Ruminiclostridium cellobioparum</i>     | 200859494  | -----I-----MKQ-----  |
|                                           | <i>Brevibacillus fulvus</i>                | 204519821  | -----IV-LIR-W-----   |
|                                           | <i>Candidatus Kryptonion thompsonii</i>    | CUS84555   | -----V-L-Y-----      |
|                                           | <i>Effusibacillus pohliae</i>              | 018132105  | -----IR-A-----       |
|                                           | <i>Candidatus Thermokryptus mobilis</i>    | HGD82170   | -----V-L-Y-----      |
|                                           | <i>Megamonas funiformis</i>                | 495813334  | -----IV-L-K-Q-----   |
|                                           | <i>Megamonas rupellensis</i>               | 517829942  | -----IV-L-K-Q-----   |
|                                           | <i>Selenomonas artemidis</i>               | 496716638  | -----MV-L-R-T-----   |
|                                           | <i>Mitsuokella multacida</i>               | 492427663  | -----IV-L-R-T-----   |
|                                           | <i>Ruminococcus lactaris</i>               | 491807899  | -----Q-----IK-N      |
|                                           | <i>Dorea formicigenerans</i>               | 491479248  | -----Q-----IKDN      |
|                                           | <i>Clostridium termitidis</i>              | 490767815  | -----I-----MKQ-----  |
|                                           | <i>Moorella thermoacetica</i>              | 83589142   | -----V-----R-T       |
|                                           | <i>Eubacterium ramulus</i>                 | 545613973  | -----Q-----IKDN      |
|                                           | <i>Dorea longicatena</i>                   | 493473057  | -----Q-----IKDN      |
|                                           | <i>Alicyclobacillus acidocaldarius</i>     | 258510746  | -----A-----IR-V      |

Figure S31

Partial sequence alignment of the protein ribonuclease R, showing a 4 aa insert (boxed) that is found in all members belonging to the order *Chlorobiales*.

|                                           |                                              | 128        | 161                                  |
|-------------------------------------------|----------------------------------------------|------------|--------------------------------------|
| Order<br><i>Chlorobiales</i>              | <i>Chlorobium luteolum</i>                   | 78186789   | KDVGDFHPENLGRVLMGH LD KCFVSCPTYGILEL |
|                                           | <i>Chlorobium phaeovibrioides</i>            | 145219770  | -----                                |
|                                           | <i>Chlorobium limicola</i>                   | 189346631  | -----                                |
|                                           | <i>Chlorobium chlorochromatii</i>            | 78188750   | -----                                |
|                                           | <i>Chlorobium phaeoclathratiforme</i>        | 194336300  | -----                                |
|                                           | <i>Chlorobium phaeobacteroides</i>           | 119356824  | -----                                |
|                                           | <i>Chlorobium ferrooxidans</i>               | 493409873  | -----E--                             |
|                                           | <i>Chloroherpeton thalassium</i>             | 193214168  | -----V---L--                         |
|                                           | <i>Prosthecochloris aestuarii</i>            | 194333994  | -----V-QM-L-N                        |
|                                           | <i>Prosthecochloris vibrioformis</i>         | 139626438  | -----V-QM-L-N                        |
|                                           | <i>Prosthecochloris aestuarii</i>            | 012505742  | -----V-QM-L-N                        |
|                                           | <i>Prosthecochloris marina</i>               | 110022066  | -----V-QM-L-N                        |
|                                           | <i>Candidatus Chlorobium masyuteu</i>        | 166808243  | -----E--                             |
|                                           | <i>Cand. Thermochlorobacter aerophilum</i>   | RFM24899   | -----V---L-R                         |
|                                           | <i>Cand. Thermochlorobacteriaceae GBCh1B</i> | KER10279   | -----V---MI-R                        |
|                                           | <i>Chlorobium sp. 445</i>                    | PI047889   | -----V---I-R                         |
|                                           | <i>Prosthecochloris sp. CIB 2401</i>         | 068867189  | -----V-QM-L-N                        |
|                                           | <i>Prosthecochloris sp. GSB1</i>             | 094083698  | -----V-QM-L-N                        |
|                                           | <i>Prosthecochloris sp. ZM</i>               | 114617229  | -----V-QM-L-N                        |
|                                           | <i>Chlorobium sp. N1</i>                     | 131353427  | -----K---E--                         |
| Larger<br><i>Ignavibacteriae</i><br>Clade | <i>Chlorobi bacterium OLB5</i>               | KXX44039   | -----V-A---MI-E                      |
|                                           | <i>Chlorobi bacterium OLB6</i>               | KXK33887   | -----M-A---LI-Q                      |
|                                           | <i>Chlorobi bacterium NICIL-2</i>            | KXB98178   | -----V-V---V-L                       |
|                                           | <i>Melioribacter roseus P3M-2</i>            | 397690900  | -----Q-V-N--I-K                      |
|                                           | <i>Ignavibacterium album JCM 16511</i>       | 385810387  | -----MSV-N--I-K                      |
|                                           | <i>Thermoflexus hugenholtzii</i>             | 088572012  | -----A-----GLKG K-                   |
|                                           | <i>Roseburia inulinivorans</i>               | 547180385  | -----Q-V-K--I-E                      |
|                                           | <i>Parabacteroides goldsteinii</i>           | 494928053  | -----I-V--MSI-L                      |
|                                           | <i>Bacteroides pyogenes</i>                  | 567224504  | -----I-V--MSI-L                      |
|                                           | <i>Barnesiella viscericola</i>               | 570742677  | -----V-V--MSI-L                      |
| Other Bacteria                            | <i>Caldimicrobium thiodismutans</i>          | 068516299  | -----V-V-K--I-E                      |
|                                           | <i>Thermodesulfobacterium geofontis</i>      | HHH86329   | -----I-V-KM--E                       |
|                                           | <i>Dissulfurirhabdus thermomarina</i>        | 163298669  | -----V-V-KM-I-E                      |
|                                           | <i>Cyprideis torosa</i>                      | CAD7233470 | -----V-I--M-L-E                      |
|                                           | <i>Thermodesulfobacterium hveragerdense</i>  | 028841618  | -----F-----                          |
|                                           | <i>Massilibacterium senegalense</i>          | 062198499  | -----M-V-KMLL-E                      |
|                                           | <i>Thermodesulfobacterium commune</i>        | 038060483  | -----F-----                          |
|                                           | <i>Sporosarcina psychrophila</i>             | HJF33052   | -----V-KMII-Q                        |
|                                           | <i>Vagococcus vulneris</i>                   | 125984437  | -----M-M-K-L-E                       |
|                                           | <i>Lachnobacterium bovis</i>                 | 027421766  | -----V-A--I-Q                        |
|                                           | <i>Fictibacillus gelatini</i>                | 026676258  | -----V-V-KMML-Q                      |
|                                           | <i>Candidatus Electrothrix aarhusiensis</i>  | RWX44970   | -----V-V-KM-V-E                      |
|                                           | <i>Desulfobulbus propionicus</i>             | 043770998  | -----V-V-KMML-E                      |
|                                           | <i>Desulfocapsa sulfexigens</i>              | HIP82974   | -----V-V-KM-L-E                      |
|                                           | <i>Dissulfuribacter thermophilus</i>         | 067616757  | -----V-V--M-I-E                      |
|                                           | <i>Bacteroides ovatus</i>                    | 490428650  | -----I-V--MSI-L                      |
|                                           | <i>Parabacteroides distasonis</i>            | 150006885  | -----I-V--MSI-L                      |
|                                           | <i>Pontibacter roseus</i>                    | 517289359  | -----A-V--M-A-L                      |
|                                           | <i>Roseburia hominis</i>                     | 347531843  | -----V-K--I-E                        |
|                                           | <i>Ruminococcus lactaris</i>                 | 565839991  | -----SV---WI-E                       |
|                                           | <i>Desulfocapsa sulfexigens</i>              | 451948750  | -----V-V-KM-L-E                      |
|                                           | <i>Desulfurivibrio alkaliphilus</i>          | 297568807  | -----V-V-KM-L-E                      |
|                                           | <i>Sphaerochaeta pleomorpha</i>              | 374314810  | -----I-V-K-LI-L                      |
|                                           | <i>Sporosarcina newyorkensis</i>             | 497174567  | -----M-V-KMLI-Q                      |

Figure S32

Partial sequence alignment of the protein bifunctional 5,10-methylene-tetrahydrofolate dehydrogenase, showing a 2 aa insert (boxed) that is found in all members belonging to the order *Chlorobiales*. The CSI is not present in any other bacterial species except for one other bacterium as indicated above, in the top 500-BLASTp hits.

|                                            |                                            |                                        |                       |                       |                        |
|--------------------------------------------|--------------------------------------------|----------------------------------------|-----------------------|-----------------------|------------------------|
| Order<br><i>Chlorobiales</i>               | <i>Chlorobium luteolum</i>                 | 78187149                               | IDHIAIAVSNLDEAVRTYMN  | LG                    | CGADAIREEVPSEQVRVA     |
|                                            | <i>Chlorobium phaeoclathratiforme</i>      | 194336268                              | -----Q--ES-LE-FR--    | --                    | --ARE-----N----        |
|                                            | <i>Chlorobium limicola</i>                 | 189346400                              | -----Q--ES-LE-F---    | --                    | --APGD-T-----K----     |
|                                            | <i>Chlorobium phaeovibrioides</i>          | 145219844                              | -----T---D-LK-FTSL    | --                    | --SRENEV-V-----T-G---- |
|                                            | <i>Chlorobium ferrooxidans</i>             | 493411298                              | -----Q--EVSLE-FL--    | --                    | --DPKSVT-----N----     |
|                                            | <i>Chlorobaculum parvum</i>                | 193212493                              | -----QD-NS--D-FVA-    | --                    | --ERSSVT-H-----A-K---- |
|                                            | <i>Chlorobium phaeobacteroides</i>         | 119356984                              | -----E--ER-IE-FKS-    | --                    | --ASET-I-----A--N----  |
|                                            | <i>Chloroherpeton thalassium</i>           | 193214308                              | ---V---NSI-ATLA-FKQL  | VD                    | E-VAS-SY----AQK-K--    |
|                                            | <i>Prosthecochloris aestuarii</i>          | 194333709                              | -----ND--S-IQQFSAL    | T                     | IDPESVH--Q-----K----   |
|                                            | <i>Chlorobium chlorochromatii</i>          | 78189093                               | -----Q--N-LD-FCTI     | --                    | --VDRQSVH----A--K--G   |
|                                            | <i>Chlorobaculum limnaeum</i>              | 2501895295                             | -----E---S-ID-WI-I    | --                    | --DRS-VT-H-----K--A-   |
|                                            | <i>Prosthecochloris marina</i>             | 110023485                              | -----HD-ENSLEQFKIL    | TD                    | ATDAQ-----K-----       |
|                                            | <i>Chloroherpeton thalassium</i>           | 012499144                              | ---V---NSI-ATLA-FKQL  | VD                    | E-VAS-SY----AQK-K--    |
|                                            | <i>Chlorobaculum thiosulfatophilum</i>     | 139457284                              | -----EH--S-ID-WT-L    | --                    | --DRS-VT-H-----K--A-   |
|                                            | <i>Candidatus Chlorobium masyuteum</i>     | 166808062                              | -----Q--EVSLE-FL--    | --                    | --DPKSVT-----N----     |
|                                            | <i>Cand. Thermochlorobacter aerophilum</i> | RFM24960                               | ---V---RSI-A-LA-FSQL  | --                    | --TEVLR-T---L-QHH----  |
|                                            | <i>Chlorobium sp. 445</i>                  | PI047471                               | -----HS--A-LE-FSKL    | -S                    | GSTMH-T---L-AHH--I-    |
|                                            | <i>Chlorobaculum sp. 24CR</i>              | 129050599                              | -----E---N-ID-WTKL    | --                    | --SRS-VT-H-----K--A-   |
|                                            | <i>Prosthecochloris sp. GSB1</i>           | 094082721                              | -----D-ES-LERF-AL     | T                     | IAPGN-----K-----       |
|                                            | <i>Prosthecochloris sp. ZM</i>             | 114618132                              | -----ND--S-IQQFSAL    | T                     | IDPESVH-----K-----     |
|                                            | <i>Ignavibacteriae</i>                     | <i>Prosthecochloris sp. HL-130-GSB</i> | 085660616             | -----RD--S-IER-IAL    | T                      |
| <i>Ignavibacterium album</i>               |                                            | 385810015                              | -E--G--K--H--IKF-EE-  |                       | F-LKCYAV---ADQK--T-    |
| <i>Melioribacter roseus</i>                |                                            | 397689645                              | -E--G--K--EQ-IKY-EE-  |                       | L-LKCYS---IRTQKT-T-    |
| <i>Calditerrivibrio nitroreducens</i>      |                                            | 313673009                              | ---G---KS---LIF-KSI   |                       | -VSPYHF---E-QK-K--     |
| <i>Deferribacter desulfuricans</i>         |                                            | 291280307                              | ---G---K-I---LSL-KTL  |                       | -ITPYHF---E-QK-KT-     |
| <i>Denitrovibrio acetiphilus</i>           |                                            | 291288330                              | ---G---K--E---TAF-KTM |                       | -IEPYHF---I-QR-K--     |
| <i>Mucispirillum schaedleri</i>            |                                            | 555549200                              | -N--GV--KSIEA-LPF-KAM |                       | ---INH-----QK-KT-      |
| <i>Flexistipes sinusarabici</i>            |                                            | 336322433                              | ---G---KS-E---F-ETL   |                       | -VSVESY---T-QK-K--     |
| <i>Geobacillus thermoleovorans</i>         |                                            | 375009421                              | V---G---RSIEK-LPF-TD- |                       | L-LPFLG---E---K--      |
| <i>Geobacillus kaustophilus</i>            |                                            | 519662137                              | V---G---RSIEK-LPF-TD- |                       | L-LPFLG---E---K--      |
| <i>Anoxybacillus kamchatkensis</i>         |                                            | 518246766                              | V---G---KS---LPF-TDT  |                       | L-LSCVG--T-E-----      |
| <i>Akkermansia muciniphila</i>             |                                            | BBP47461                               | ---G---KS--AT-PY-RDA  |                       | L-LGEPH----TQK----     |
| <i>Nitrososphaeraeae archaeon</i>          |                                            | MBD0360489                             | -----KSV---KD-QS-     |                       | LNI-QLEF-V--N-K-K--    |
| <i>Caldithrix abyssi</i>                   |                                            | HHJ53415                               | -N-----ES---IPY-RD-   |                       | L-LEL-AT---DQK----     |
| <i>Chrysiogenes arsenatis</i>              |                                            | 027389778                              | ---GV--RS---GF-RAM    |                       | -EPYHF-----QK----      |
| <i>Acinetobacter baumannii</i>             |                                            | 171253172                              | -E--G--K-----QF-TQI   |                       | L-LKL-GF-T-E--K----    |
| <i>Fictibacillus phosphorivorans</i>       |                                            | 153237885                              | ---G---KS---LPF-V--   |                       | L-LTLEA-----QK-K--     |
| <i>Ureibacillus manganicus</i>             |                                            | 036186694                              | ---G--N---RITY-TET    |                       | L-LKLLK---QN-----      |
| <i>Lysinibacillus halotolerans</i>         |                                            | 122973306                              | V---G---K---RITY-TET  |                       | L-LTLLK-----QH----     |
| <i>Psychrobacillus glaciei</i>             |                                            | 151700256                              | V---G---KSIE--LPY-TET |                       | L-LKL-H-----K----      |
| <i>Candidatus Nitrosotalea okcheo</i>      |                                            | 157927039                              | L--V---N---A--KQ-KE-  |                       | L-VGDVEF-T-E--G----    |
| <i>Ktedonosporobacter rubrisoli</i>        |                                            | 207229296                              | ---V--I-K-IEQ-LSF-RD- |                       | L-ITPSA-K---T-----I-   |
| <i>Candidatus Nitrososphaera gargensis</i> |                                            | 015019962                              | V-----K-VE--LKN-QKI   |                       | LNV-HLE----N-K-K--     |
| <i>Paenisporosarcina indica</i>            |                                            | 075618245                              | V---G---K---TIPY-TET  |                       | L-LTLLK---A--S----     |
| Other Bacteria                             |                                            | <i>Kurthia huakuii</i>                 | 029499089             | V---G---K-I--RIAY-TD- |                        |
|                                            | <i>Psychrobacillus soli</i>                | 142606884                              | V---G---K-IEDSLPY-TET |                       | L-LKL-H-----K----      |
|                                            | <i>Lysinibacillus timonensis</i>           | 106779771                              | V---G---R--N-RITF-TET |                       | L-LKLLK---TQH----      |
|                                            | <i>Kurthia zopfii</i>                      | 109350013                              | V---G---KD--ARITY-T-- |                       | L-MKLLNV---Q-----      |
|                                            | <i>Paenactinomyces guangxiensis</i>        | 181752266                              | -S--G--Q---SS--W-QE-  |                       | L-LPFEG--A-E-----      |
|                                            | <i>Rummeliibacillus stabekisii</i>         | 066786744                              | ---G---K---RTTY-T--   |                       | L-MKLLN---E--G----     |
|                                            | <i>Planococcus chinensis</i>               | MBM7531103                             | V---G---R--E-VIPY-TET |                       | L-CPLLK---A-QK----     |
|                                            | <i>Ureibacillus sinduriensis</i>           | 036202110                              | V---G---KD--KQ-TY-TET |                       | I-LKLLK---E-Q-----     |
|                                            | <i>Lysinibacillus fusiformis</i>           | 205444228                              | V---G---R---RITY-TEI  |                       | L-LKLMKV---E-Q-----    |
|                                            | <i>Nitrosopumilales archaeon</i>           | RPJ30166                               | V--V---NSIS--LKN-EKI  |                       | LKI-K-N---I-T-R-K--    |
|                                            | <i>Rummeliibacillus stabekisii</i>         | 147193591                              | ---G--K---RTTY-T--    |                       | L-MKLLN---E--G----     |
|                                            | <i>Ureibacillus massiliensis</i>           | 036173336                              | V---G-S-R--E-QITY-TE- |                       | L-LKLLK---QN-----      |
|                                            | <i>Planomicrobium mcmeekinii</i>           | MBP1899710                             | V---G---RK--DVIPY-TET |                       | L-CPLLK---E--R----     |
|                                            | <i>Anoxybacillus flavithermus</i>          | 491027944                              | V---G---KS---LPF-TDT  |                       | L-LSCVGM-T-E-----      |
|                                            | <i>Bacillus methanolicus</i>               | 490570485                              | V---G---KS--KTLSF-TE- |                       | L-LRELLG---E--K-K--    |
|                                            | <i>Geobacillus thermodenitrificans</i>     | 138895934                              | V---G---RSIEK-LPF-TD- |                       | L-LPFLG---E---K--      |
|                                            | <i>Lysinibacillus sphaericus</i>           | 499131666                              | V---G---R---RITY-TEI  |                       | L-LKLLKV--E-Q-----     |
|                                            | <i>Bacillus massiliosenegalensis</i>       | 517984218                              | V---G---KSME--LPF-TD- |                       | L-LEVQA--T-E--K-K--    |
|                                            | <i>Geobacter bemidjiensis</i>              | 197116956                              | -N-VGV--AS-E--LPF-RDS |                       | L-MTFSGT----QL----     |
|                                            | <i>Geopsychrobacter electrodiphilus</i>    | 522166183                              | -N--G--K--ET--PF-RDT  |                       | L-MTFEGT----TEQK----   |
|                                            | <i>Desulfurispora thermophila</i>          | 516757206                              | ---G---K--QQ-IEF-ETT  |                       | L-LKVAG-----EQK----    |
|                                            | <i>Halanaerobium saccharolyticum</i>       | 491632004                              | -E--G--Q--E-SLK-FQDI  |                       | L-LEFLKQ-T-E-QG-KI-    |
|                                            | <i>Coraliomargarita akajimensis</i>        | 294054336                              | ---G--KS---SIEY-EKA   |                       | L-LHCHGK---E-QK-KT-    |
|                                            | <i>Butyricimonas synergistica</i>          | 517147053                              | -E--G--AS---IPY-E--   |                       | L-LKCYA---KDQK-KT-     |
|                                            | <i>Porphyromonas gingivalis</i>            | 34541263                               | -E-LG--KSIE--LPY-E--  |                       | L-LKCYS-----DQK--T-    |
| <i>Archaeoglobus sulfatcallidus</i>        | 488600058                                  | ---G--K-----EL-KKL                     |                       | -FEVKG---EEQK-K--     |                        |
| <i>Ferroglobus placidus</i>                | 288932190                                  | ---GV--K--E---IEL-KKL                  |                       | -FEVKG---KDQK----     |                        |

Figure S33

Partial sequence alignment of the protein lactoylglutathione lyase, showing a 2 aa insert (boxed) that is found in all members belonging to the order *Chlorobiales*.

**Order  
Chlorobiales**

**Other Bacteria**

|                                        |            |
|----------------------------------------|------------|
| <i>Chlorobium luteolum</i>             | 78187419   |
| <i>Chlorobium phaeovibrioides</i>      | 145220164  |
| <i>Chlorobium ferrooxidans</i>         | 493409422  |
| <i>Chlorobium phaeoclathratiforme</i>  | 194337038  |
| <i>Chlorobaculum parvum</i>            | 193212337  |
| <i>Chlorobium chlorochromatii</i>      | 78189233   |
| <i>Chlorobaculum tepidum</i>           | 21673528   |
| <i>Chlorobium phaeobacteroides</i>     | 119356564  |
| <i>Chlorobium limicola</i>             | 189346198  |
| <i>Chlorobaculum limnaeum</i>          | 2501893292 |
| <i>Chloroherpeton thalassium</i>       | 193215746  |
| <i>Prosthecochloris marina</i>         | 110022181  |
| <i>Chlorobaculum thiosulfatophilum</i> | 139456668  |
| <i>Prosthecochloris marina</i>         | 110022181  |
| <i>Candidatus Chlorobium masyuteum</i> | 166807938  |
| <i>Chlorobium</i> sp. KB01             | 076790525  |
| <i>Chlorobium</i> sp. N1               | 131354040  |
| <i>Chlorobaculum</i> sp. 24CR          | 129050323  |
| <i>Plesiomonas shigelloides</i>        | 499149739  |
| <i>Aeromonas veronii</i>               | 330831321  |
| <i>Vibrio fluvialis</i>                | 521102759  |
| <i>Grimontia hollisae</i>              | 491643491  |
| <i>Photobacterium leiognathi</i>       | 565848455  |
| <i>Photobacterium angustum</i>         | 491514775  |
| <i>Aeromonas media</i>                 | 491473250  |
| <i>Vibrio ordalii</i>                  | 498005262  |
| <i>Enterovibrio norvegicus</i>         | 515572621  |
| <i>Salinivibrio costicola</i>          | 543216350  |
| <i>Vibrio mimicus</i>                  | 446854660  |
| <i>Photobacterium damsela</i>          | 491444567  |
| <i>Aeromonas molluscorum</i>           | 492609492  |
| <i>Vibrio metschnikovii</i>            | 490528628  |
| <i>Glaciecola punicea</i>              | 492851889  |
| <i>Enterococcus gallinarum</i>         | 537098851  |
| <i>Cellulophaga algicola</i>           | 319954194  |
| <i>Cytophaga aurantiaca</i>            | 517154023  |
| <i>Cytophaga hutchinsonii</i>          | 110636668  |
| <i>Winogradskyella psychrotolerans</i> | 527071521  |
| <i>Butyrivibrio synergistica</i>       | 517147441  |
| <i>Desulfocapsa sulfexigens</i>        | 451947508  |
| <i>Aeromonas veronii</i>               | 167573688  |
| <i>Aeromonas hydrophila</i>            | 206819215  |
| <i>Shigella flexneri</i>               | EFZ8856520 |
| <i>Escherichia albertii</i>            | 149451965  |
| <i>Kistimonas asteriae</i>             | 211826209  |
| <i>Kiritimatiella glycovorans</i>      | 052882252  |
| <i>Ponticella desulfatans</i>          | VG015799   |

55

|                           |   |                            |     |
|---------------------------|---|----------------------------|-----|
| LVTVALRRFNREQLEDDLFGPLSQL | E | GITLMPNTSGASTAAEAVKAAHISRE | 106 |
| -----E-                   | P | -----I--N--                |     |
| -----KE-                  | S | -----R--A--                |     |
| -I-----A-----AI-          | - | -V-----IR--A--             |     |
| -----A-----EI-            | - | -L-----A-K--               |     |
| -----A-----A-             | - | AV-----IR--A-Q             |     |
| -----A-----EI-            | - | -L-----A-K-I--A--          |     |
| -----IA-----A-            | Q | -----R--IH--A--            |     |
| -----PG---T--TSI          | P | -----Q--R-A--              |     |
| -----A-----AI             | K | -L-----A-K-----            |     |
| M---I--MDLKSDSAENIMKFLDD  | K | KYF-L---A-CY--K--LT-ELA--  |     |
| -----V-H--AA--TI-         | - | -L-----N-Q--R-----         |     |
| -----A-----EI-            | - | -L-----A-S-----            |     |
| -----V-H--AA--TI-         | - | -L-----N-Q--R-----         |     |
| -----                     | P | -----R--A--                |     |
| -----KE-                  | S | -----R--A--                |     |
| -----E-                   | - | -L-----                    |     |
| -----A-----EI-            | - | -L-----A-K-----            |     |
| ---M-K-VDCGGGQ--ILT--RAM  | P | HLRWL-----RD-K--IL--LA--   |     |
| ---M-IK-LEPGKVH--ILS--L-- | - | -VK-L-----K-----F--LA--    |     |
| ---M-K-VDLAERD--ILA--IEA  | - | -H-L-----K--RD--F--LA--    |     |
| ---M-K-VDIQNR--ILA--IAS   | - | -N-L-----K--K--F--RLA--    |     |
| ---M-K-V-IAERD--ILA--I-A  | - | -VN-L-----KN-K--IF--QLA--  |     |
| ---M-K-V-IAERD--ILA--I-A  | - | -VN-L-----KN-K--IF--QLA--  |     |
| ---M-IK-LEPGKRH--ILS--LK- | - | -VK-L-----K-----F--LA--    |     |
| MA-M-K-VDLN--N--IL--IE-   | - | -VH-L-----KN-KD-IF--LA--   |     |
| ---M-K-VDVQNR--ILA--IAA   | - | NLN-L-----K--K--IF--RLA--  |     |
| ---M---VDVHATQ--ILT--RE-  | - | -VR-L-----KN-Q--F--RLA--   |     |
| ---M-K-IDLA-RD--ILA--LDM  | - | KMN-L-----KN--D--Y--QLA--  |     |
| ---M-K-VELGKKY--ILS--K--  | - | -VA-L-----K--E--IF--RLA--  |     |
| ---M-IK-LEPGKRH--ILS--LA- | - | -VK-L-----K-----F--LA--    |     |
| ---M-K-VDLQHR--ILA--IAA   | - | -VQ-L-----K--R--IY--LA--   |     |
| ---L-IK-IDIR-ST-N-MA--S-  | - | -VK-L-----RN-Q--IF--QLA--  |     |
| ---M-IK-LEPGKAH--ILS--L-- | - | -VK-L-----K-----F--LA--    |     |
| -I---K-VDL-CES--LSY--HD   | - | N-S-L-----VR--K--F--QL--   |     |
| -----IDI-GQ--ILKW-KKG     | - | NFN-L-----RN-K--F--TLA--   |     |
| -----IDIDGQ--ILKW-KKG     | - | NFN-L-----RN-K--F--TLA--   |     |
| -I---K-VDVQNN--ILRH-KHA   | - | H-N-L-----VR--K--F--EL--   |     |
| -----K-VDL-SK--ILAH-KAP   | - | H--L-----VR--K--FV-QLA--   |     |
| M-----V-LDNP--IMKA--R     | - | DY-FL-----RN-N--IRL--LA-A  |     |
| ---M-IK-LEPGKAH--ILS--L-- | - | -VK-L-----K-----F--LA--    |     |
| ---M-IK-LEPGKAH--ILS--L-- | - | -VK-L-----K-----F--LA--    |     |
| ---L-MK-V-LR-HN--ILA--IAE | - | -V--L-----K--E--IF--LA--   |     |
| ---L-MK-V-LR-HN--ILA--IAE | - | -V--L-----K--E--IF--LA--   |     |
| ----MK-VDLQ-Q--IL--Q-A    | C | DVR-L-----R--E--F--KLA--   |     |
| -I-----KT----YA--AS-      | - | -A-----RD-D--CR--RLG--     |     |
| -----D-A---Y-----         | - | NVR-----MN-K--R--MLG--     |     |

Figure S34

Partial sequence alignment of the protein thiazole synthase, showing a 1 aa insert (boxed) that is found in all members belonging to the order *Chlorobiales*.

|                                           |                                        |            |                            |                        |
|-------------------------------------------|----------------------------------------|------------|----------------------------|------------------------|
| Order<br><i>Chlorobiales</i>              | <i>Chloroherpeton thalassium</i>       | 193213813  | GRHPVLEKIMPIDRKYPNDCRLDVE  | TRVQIITGPNMSGKSSFLRQ   |
|                                           | <i>Prosthecochloris vibrioformis</i>   | 139626255  | -----R-LGV-EA--A---SF-EQ   | E-MR-V-----A-----      |
|                                           | <i>Chlorobium phaeoclathratiforme</i>  | 194336140  | -----RM-SAEDP-----HF-EK    | QQML-----A-----        |
|                                           | <i>Chlorobium ferrooxidans</i>         | 493410219  | -----R--SD-EP--Q---LF-EK   | QKML-----A-----        |
|                                           | <i>Chlorobium chlorochromatii</i>      | 78189282   | -----RLLGAEES-I---HF-DK    | QTML-----A---Y---      |
|                                           | <i>Chlorobium phaeovibrioides</i>      | 145220133  | -----R--KP-EPF-K---HF-GQ   | Q-MLM-----A---Y---     |
|                                           | <i>Chlorobaculum parvum</i>            | 193213235  | -----R-LGA-EP--A---VGSD    | QQLL-----A---Y---      |
|                                           | <i>Chlorobium phaeobacteroides</i>     | 189499799  | -----R-LHV-EP-----FF-KK    | Q-MLMV-----A---Y---    |
|                                           | <i>Chlorobaculum tepidum</i>           | 21674323   | -----R-LGA-EP--A---QVGS-   | QQLL-----A---Y---      |
|                                           | <i>Prosthecochloris aestuarii</i>      | 194334404  | -----R-VDV-EP--S---LF-ER   | Q-ML-V-----A---Y---    |
|                                           | <i>Chlorobium limicola</i>             | 189347201  | -----R-L-A-EP-IA--ALF-DR   | QKMLM-----A---Y---     |
|                                           | <i>Prosthecochloris ethylica</i>       | 175186793  | -----R-LGV-EP--A---TF-D-   | Q-MM-V-----A---Y---    |
|                                           | <i>Chlorobaculum limnaeum</i>          | 2501895063 | -----R-LGA-EP--S---VGAS-   | QQLL-----A---Y---      |
|                                           | <i>Chlorobium luteolum</i>             | 78186335   | -Y--W-L-SHR--EVL-L-LE-GLN  | EQ-L-S--S--AG--VAMKT   |
|                                           | <i>Prosthecochloris sp. CIB 2401</i>   | 068866586  | -----R-LGV-EA--A---SF-EQ   | E-MR-V-----A---Y---    |
|                                           | <i>Prosthecochloris sp. ZM_2</i>       | 114607669  | -----R-LGV-EP--A---TF-D-   | Q-MM-V-----A---Y---    |
|                                           | <i>Prosthecochloris marina</i>         | 167392938  | -----R-LGV-EP--A---FF-RK   | Q-ML-V-----A---Y---    |
|                                           | <i>Prosthecochloris sp. HL-130-GSB</i> | 085659292  | -----R-LGV-EP--A---VF-AQ   | H-MM-V-----A---Y---    |
|                                           | <i>Prosthecochloris sp. GSB1</i>       | 094082121  | -----R-LDVGE-----E-NDR     | Q-MLVV-----A-----      |
|                                           | <i>Chlorobium sp. KB01</i>             | 076791947  | -----R--SD-EP--Q---LF-E-   | QKML-----A-----        |
|                                           | <i>Candidatus Chlorobium masyuteum</i> | 166806887  | -----R--SD-EP--Q---LF-EK   | QKML-----A-----        |
|                                           | <i>Chlorobium sp. N1</i>               | 131353967  | -----RLLSPEDPF--S---LF-EQ  | Q-MLM-----A---Y---     |
|                                           | <i>Prosthecochloris sp. ZM</i>         | 114618085  | -----R-VDV-EP--S---LF-ER   | Q-ML-V-----A---Y---    |
|                                           | <i>Chlorobaculum sp. 24CR</i>          | 129051820  | -----R-LGA-EP-IS---VGAS-   | QQLL-----A---Y---      |
| Larger<br><i>Ignavibacteriae</i><br>Clade | <i>Chlorobi bacterium OLB7</i>         | KXK55477   | ----V-TLL-PGER----TA--TA   | A-D-IA-----Y---        |
|                                           | <i>Chlorobi bacterium OLB6</i>         | KXK35082   | A----I-RLL-AGTR-----NIV--T | T-HQLMVL-----Y---      |
|                                           | <i>Melioribacter roseus</i>            | 397690923  | ----V-Q-L-PGE-FT--S---SSS  | E-DQII-L-----A---VY--- |
|                                           | <i>Ignavibacterium album</i>           | 385809871  | ----V-R-LSPGE-FT---K-NNS   | D-QQIILL-----A---VY--- |
|                                           | <i>Chthonomonas calidirosea</i>        | 512552186  | ----I-R-GLGSD-I---H--E-    | N-LL-----Y---          |
|                                           | <i>Rubrobacter xylanophilus</i>        | 108803143  | ----V-HA-TETPF---A-I-GG    | S-L-----A---VY---      |
|                                           | <i>Taylorella asinigenitalis</i>       | 479191464  | ----V-RTI-E-FTA--F-NS-     | N-M-----G---TYM--      |
|                                           | <i>Desulfurispora thermophila</i>      | 516757174  | ----V-VLD-GSF---LT--KQ     | --LILL-----A---T-M--   |
|                                           | <i>Thermopagus xiamenensis</i>         | 498212269  | ----I-TQL-AGEE-----VY--S-  | T-QQ-M-----A---AL---   |
|                                           | <i>Prevotella micans</i>               | 494011157  | ----I-TQL--GEQ-----VL--S-  | H-QQIM-----A---AL---   |
|                                           | <i>Anaerophaga thermohalophila</i>     | 498107809  | ----I--QL-VGEE-----VF--ND  | T-QQIM-----A---AL---   |
|                                           | <i>Gracilimonas tropica</i>            | 521070739  | ----V-SL-MGEPFI--IK--N-    | N-DQIL-----A---II---   |
|                                           | <i>Gillisia marina</i>                 | 497914865  | ----I--QL-HGEQ--T--VF--R-  | T-QQ-IM-----A---AI---  |
|                                           | <i>Cytophaga hutchinsonii</i>          | 110636573  | ----I--QL-LGES-I---IY--D-  | T-QQ-M-----A---AL---   |
|                                           | <i>Nonlabens dokdonensis</i>           | 443243179  | ----I--ML-A-QP-I---VQ--RD  | S-QQIIM-----A---AI---  |
| Other Bacteria                            | <i>Porphyromonas catoniae</i>          | 491610388  | ----I--QL-FGES-----VH--QK  | E-QIMV-----A---AL---   |
|                                           | <i>Cytophaga aurantiaca</i>            | 517154534  | ----I--QL-LGES-----IY--D-  | N-QQ-M-----A---AL---   |
|                                           | <i>Bacteroides ovatus</i>              | 490426514  | ----I--QL--GE--IA--VM--SD  | T-QQII-----A---AL---   |
|                                           | <i>Bacteroides vulgatus</i>            | 511016684  | ----I--QL-VGE--IA--VF--S-  | T-QQII-----A---AL---   |
|                                           | <i>Eudoraea adriatica</i>              | 518500928  | ----I--QL-LGEA-I---LV-NR-  | S-QQIIM-----A---AI---  |
|                                           | <i>Candidatus Amoebophilus</i>         | 189502159  | ----I-QQLSV-VS-----IY--N-  | T-QQ-IV-----A---AL---  |
|                                           | <i>Prevotella marshii</i>              | 494007441  | ----I-TQL-LGE-----IF--S-   | R-QQIM-----A---AL---   |
|                                           | <i>Prevotella nanceiensis</i>          | 517174161  | ----I-MQL--GER-----IL--S-  | K-QQIMM-----A---AL---  |
|                                           | <i>Bacteroides xylanisolvens</i>       | 495298839  | ----I--QL--GE--IA--VM--SN  | T-QQII-----A---AL---   |
|                                           | <i>Kordia algicida</i>                 | 494155465  | ----I--QL--GES-IA--VY--RN  | T-QQIIM-----A---AI---  |
|                                           | <i>Halanaerobium praevalens</i>        | 385799933  | ----V-MFT-EQF-----Y--QT    | E-Q-FV-----TYM--       |
|                                           | <i>Butyrivibrio fibrisolvens</i>       | 479189702  | ----V-QMINA-QFIS--Q--LD    | S-RTIA-----A---TYM--   |
|                                           | <i>Nematostella vectensis</i>          | 156325874  | ----I--QL--GEE-IA--VV-NRN  | Q-QQIIM-----A---AI---  |
|                                           | <i>Caldithrix abyssii</i>              | 493983722  | ----V--TL-PGEDFIA--AY--PD  | S-EQIW-----A---T---    |

Figure S35

Partial sequence alignment of the protein DNA mismatch repair protein (MutS), showing a 1 aa deletion (boxed) that is found in all members belonging to the order *Chlorobiales*. The CSI is not present in any other bacterial species except for the four other bacteria as indicated above, in the top 500-BLASTp hits.

|  |                                        | 193212508  | 400                           | 447                 |
|--|----------------------------------------|------------|-------------------------------|---------------------|
|  | <i>Chlorobaculum parvum</i>            | 193212508  | NRDPLKTKQLEKGIRQLTDEGVAQLFVQY | GTRKIVGTVGELQFDVIQF |
|  | <i>Chlorobaculum tepidum</i>           | 010932499  | -----                         | -----               |
|  | <i>Prosthecochloris marina</i>         | 110023507  | ----F-S-----L-----E-----L--   | -N---L-----R-       |
|  | <i>Chlorobium ferrooxidans</i>         | 006365821  | ---M-A---D-----E-----I-H      | -A---I-----K-       |
|  | <i>Pelodictyon luteolum</i>            | KZK74796   | ---M-Q---D-----E-L-----I-F    | -N---I-----K-       |
|  | <i>Chlorobium phaeoclathratiforme</i>  | 194336646  | ---M-A---D-V---E-----I-H      | -A---I-----K-       |
|  | <i>Chlorobium phaeovibrioides</i>      | 145219836  | ---M-Q---D-----E-L-----I-F    | -N---I-----K-       |
|  | <i>Prosthecochloris aestuarii</i>      | 194333731  | ---F-S---D-V---E-----M-H      | -N---I-----R-       |
|  | <i>Chlorobaculum thiosulfatiphilum</i> | 139457824  | -----                         | -----               |
|  | <i>Chlorobaculum tepidum</i>           | 21673647   | -----                         | -----               |
|  | <i>Chlorobium limicola</i>             | 189346321  | -----D-----E-----             | -S-----K-           |
|  | <i>Chlorobium chlorochromatii</i>      | 78188914   | -----A---D-----E-----I--      | -S---I-----K-       |
|  | <i>Chlorobium phaeobacteroides</i>     | 189500131  | ---F-A-----E-----M--          | -N-----K-           |
|  | <i>Chlorobaculum limnaeum</i>          | 2501894968 | -----H-----                   | -S-----             |
|  | <i>Candidatus Chlorobium masyuteum</i> | 166808734  | ---M-A---D-----E-----I-H      | -A---I-----K-       |
|  | <i>Chlorobaculum</i> sp. 24CR          | 129050574  | -----                         | -----               |
|  | <i>Chlorobium</i> sp. KB01             | 076790347  | ---M-A---D-----E-----I-H      | -A---I-----K-       |
|  | <i>Prosthecochloris</i> sp. HL-130-GSB | 085659723  | ---F-S-----V---E-L-----I--    | -N---I-----R-       |
|  | <i>Chlorobium</i> sp. N1               | 131353584  | ---M-Q-D-----E-L-----F        | -N-R-I-----K-       |
|  | <i>Prosthecochloris</i> sp. GSB1       | 094082708  | ---F-A-----L---E-----L--      | -N---I-----R-       |
|  | <i>Chlorobi bacterium OLB7</i>         | KXK57314   | -A-R-S-Q--LE--RE--AI-VMYSP N  | S-DP-LAA--Q-----VK- |
|  | <i>Pedobacter arcticus</i>             | 515828150  | -N-F-----H--S-----I-N P       | -N-----E---         |
|  | <i>Proteiniphilum acetatigenes</i>     | 518370219  | -A--M-S---Q---E--M-----TNQ F  | NG--I---Q---E---Y   |
|  | <i>Niabella aurantiaca</i>             | 517456776  | ---M-----LL-----T-F G         | --K---C-----E---Y   |
|  | <i>Mucilaginibacter paludis</i>        | 495787162  | ---S-----Q---E-----Q P        | -N---I-----E-S-     |
|  | <i>Chitinophaga pinensis</i>           | 256422385  | -K-M-----L-----T-H N          | -N---I-C--D---E---Y |
|  | <i>Dyadobacter beijingsensis</i>       | 518785225  | -M-M-S-----Q-----TLD L        | -N-V-----Y          |
|  | <i>Emticia oligotrophica</i>           | 408671881  | -K-M-S-----VQ-----TIQ P       | -N---I-----E---     |
|  | <i>Rudanella lutea</i>                 | 518834208  | -L-M-S-----E-----TLQ P        | -N-----E---Y        |
|  | <i>Arcticibacter svalbardensis</i>     | 510820811  | -----Q---E-----I-Q P          | -N---A-A---E-N-     |
|  | <i>Segetibacter koreensis</i>          | 517441155  | -K-----LI-----T-F G           | -NK--I-C-----E---Y  |
|  | <i>Runella slithyformis</i>            | 338213186  | -L--M-S-----VQ-----TLQ P      | -N-V-----E---Y      |
|  | <i>Bacteroides coprophilus</i>         | 495420018  | -A--M-----N--D--M-----NQ F    | NG--I---Q---E---Y   |
|  | <i>Fibrisoma limi</i>                  | 496584223  | -L--M-S---D---E-----TLQ P     | -N-V---D-----Y      |
|  | <i>Pedobacter agri</i>                 | 498284896  | -M--MR-----E-----MQ P         | -N-VI-A-----E-N-    |
|  | <i>Spirosoma linguale</i>              | 284036038  | -L--M-S---D---Q-----NLE L     | -N-----E---Y        |
|  | <i>Niastella koreensis</i>             | 375146319  | -K-M-----LL-----T-F G         | -NK--I-C--D---E---Y |
|  | <i>Paludibacter propionigenes</i>      | 313203001  | -A--M---D--N--M-----TNQ Y     | NG--I---Q---E---Y   |
|  | <i>Fibrella aestuarina</i>             | 436836389  | -L--M-S---D---Q-----TLA L     | -N-----E---Y        |
|  | <i>Paraprevotella xylaniphila</i>      | 495900769  | -A--M---N--E--M-----NQ F      | NG--I---Q---E---Y   |
|  | <i>Paraprevotella clara</i>            | 547245326  | -A--M---N---E--M-----NQ F     | NG--I---Q---E---Y   |
|  | <i>Prevotella stercorea</i>            | 495178579  | -D--M-A-----N--M-----NQ F     | NG--I---Q---E---Y   |
|  | <i>Bacteroides plebeius</i>            | 494837401  | -A--M---N---D--M-----NQ F     | NG--I---Q---E---Y   |
|  | <i>Bacteroides coprophilus</i>         | 547871944  | -A--M---N---D--M-----NQ F     | NG--I---Q---E---Y   |
|  | <i>Alloprevotella rava</i>             | 496706421  | -A--M---NR--E--M-----NQ F     | NG--I---Q---E---Y   |
|  | <i>Barnesiella viscericola</i>         | 570741391  | -D--M-S---N--D--M-----ISQ F   | NG--I---Q---E---Y   |

Figure S36

Partial sequence alignment of the protein peptide chain release factor 3, showing a 1 aa deletion (boxed) that is specific for members of the family *Chlorobiaceae*.

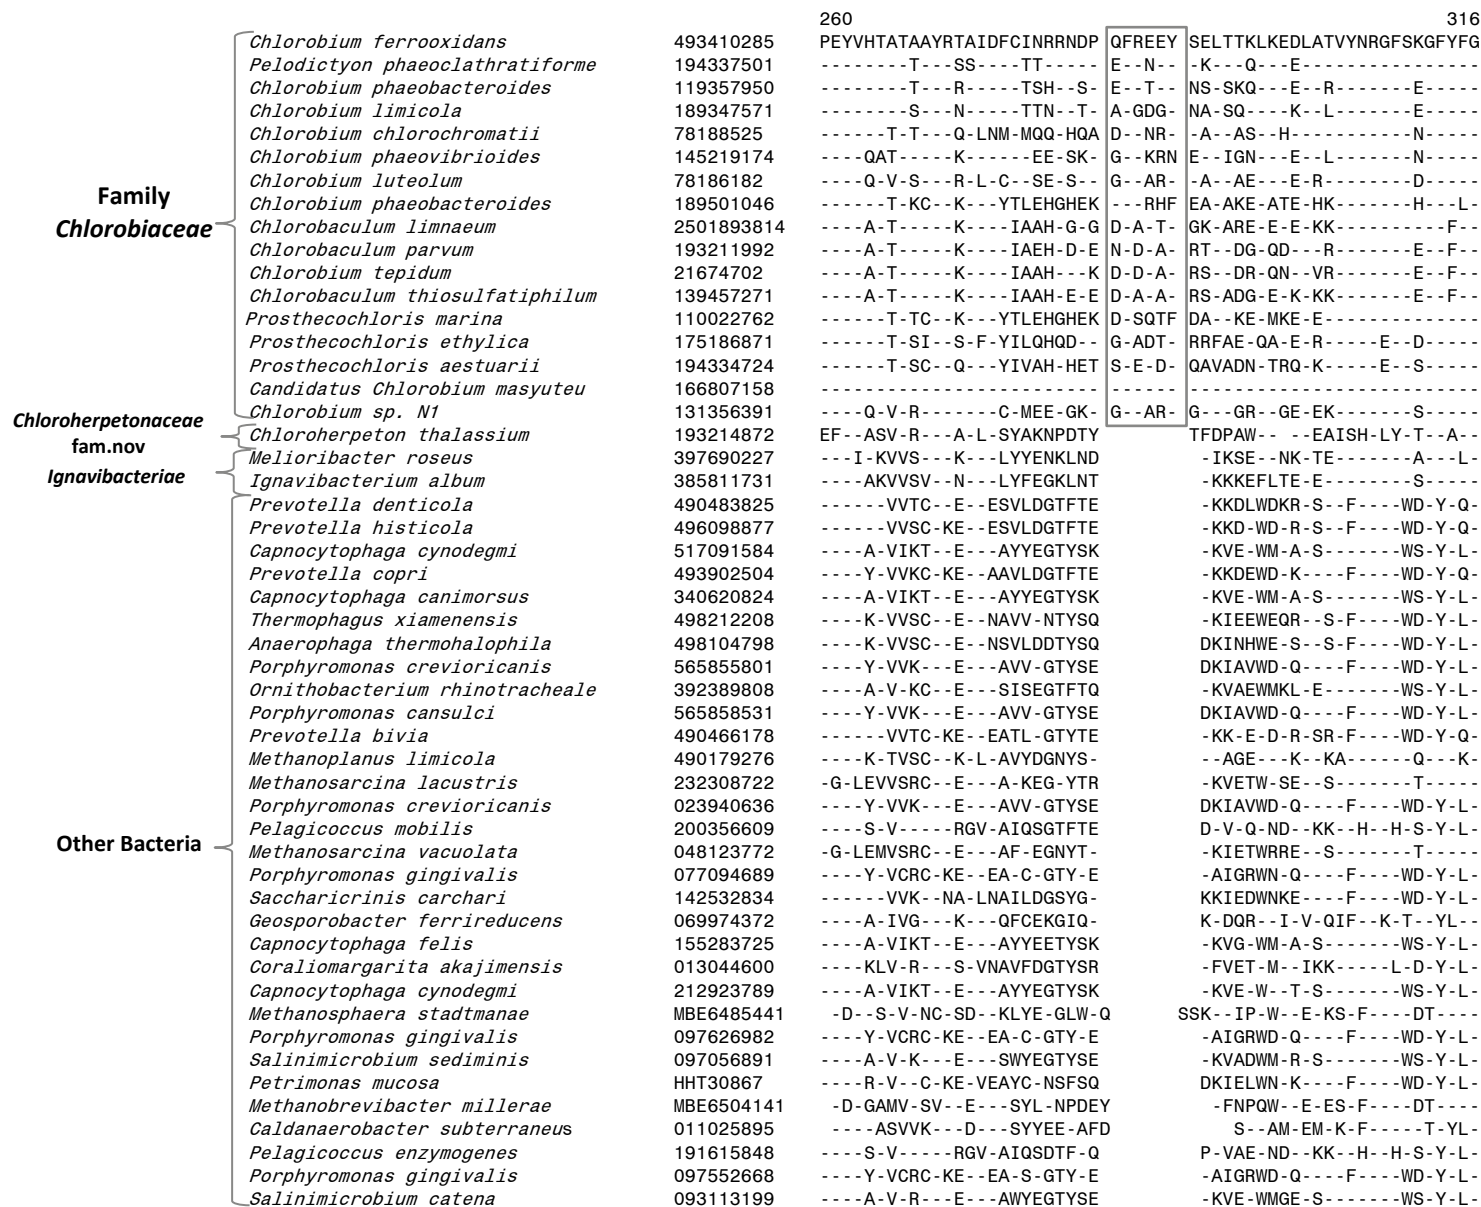

Figure S37

Partial sequence alignment of the protein U32 family peptidase, showing a 6 aa insertion (boxed) that specific for members of the family *Chlorobiaceae*.

|                                |                                            |            |                    |                                        |
|--------------------------------|--------------------------------------------|------------|--------------------|----------------------------------------|
|                                |                                            | 329        |                    | 382                                    |
|                                | <i>Chlorobium phaeovibrioides</i>          | 145220314  | LPLAYFHVFSQSVRPGTV | LAREV SCGERLAVAPQVASGRSAILKEIGERKAAEF  |
|                                | <i>Chlorobium ferrooxidans</i>             | 493410273  | ----L-----I----A   | ---QT ASR-LI----AEIAR--RV-NDL-R--E-A-  |
|                                | <i>Chlorobium phaeobacteroides</i>         | 119356260  | --ISSL-----Q       | --EQ ATKK-EV-D-DECRQ--SE-IKL-NL-KSR-   |
|                                | <i>Chlorobium luteolum</i>                 | 78187582   | --S-L-----L        | -G-Q- AG----R-N-KETAR--L-V-L-----R--   |
|                                | <i>Chlorobaculum parvum</i>                | 193213382  | --V-L-----R        | -S-I AEKRVSR-VSAE--R-ATR-AQL-QQLERR-   |
|                                | <i>Chlorobium limicola</i>                 | 189345895  | --I-L---T-----     | --AQL AAD--RLPS-VELDR--RL-I-L-K--TE-Y  |
|                                | <i>Pelodictyon phaeoclathratiforme</i>     | 194335608  | ----SL-----I---R   | --LQI TNS--KP-ESAETAR-YSE-A-L-R-HE-R-  |
|                                | <i>Prosthecochloris aestuarii</i>          | 194334590  | ----L-I-T--I----A  | ---Q- QS-L-QP--HDIVRH--RL-R-L-----KR-- |
| Family<br><i>Chlorobiaceae</i> | <i>Chlorobium tepidum</i>                  | 66576257   | --V-L---T--P---K   | -FA-I AEKKLIRIPSAES-S-A-R-GV---IERR-   |
|                                | <i>Chlorobium chlorochromatii</i>          | 78188544   | --S-L-----L-H-L    | --D-- ARQ--K-LSGDIVAE--RQMVAL-HQ-E-A-  |
|                                | <i>Chlorobaculum limnaeum</i>              | 2501894174 | --V-L---K--P--R-S  | -FA-I AGKKLIR-PSAE--S-A-R-G---KIERR-   |
|                                | <i>Prosthecochloris ethylica</i>           | 198911889  | --I--L-I-T--L---A  | ---Q- DT-L-RPLP-DLVKE--RQ-H-L-HERKQA-  |
|                                | <i>Chlorobaculum thiosulfatophilum</i>     | 139457401  | --V-L---K--P--R-R  | -FA-I AEKKLIR-PSAE--S-A-R-G-----P--    |
|                                | <i>Prosthecochloris marina</i>             | 167392930  | --A-L---T--L--E--  | -SKQI -S-VCKK-HSEI-RS--KL-LDLA-V-QR--  |
|                                | <i>Candidatus Chlorobium masyuteu</i>      | 166807448  | ----L-----I----A   | ---QT ASR-LI----AEIAR--RV-NDL-R--E-A-  |
|                                | <i>Chlorobium</i> sp. KB01                 | 083694608  | ----L-----I----A   | ---QT ASR-LI----AEIAR--RV-NDL-R--E-A-  |
|                                | <i>Chlorobium</i> sp. N1                   | 131354373  | --S-L-----L        | ---Q- EA-V-RR-E-KE-AR---E-IRL--D--RSY  |
|                                | <i>Cand. Thermochlorobacter aerophilum</i> | RFM24603   | --I--L---TF-K--N-Y | A-ELL DR--WQP--DK-KQA--RK-H-LSFF-KQK-  |
| Chloroherpetonaceae<br>fam.nov | <i>Melioribacter roseus</i>                | 397690794  | --VS-L---TY-E--N-K | AEKMPHEH-THEIRKK-NNM-RILS-K-RN--       |
|                                | <i>Ignavibacterium album</i>               | 385809643  | --FS-L---TY-E--N-K | AISLPGK-EVNERKK-NNM-RILSDK-KNA-        |
| Other Bacteria                 | <i>Ignavibacterium album</i>               | 385809643  | -----TY-D-K--T     | -FKMKPK-----KKL-NR-MI-M-Q--KFA-        |
|                                | <i>Caldithrix abyssi</i>                   | 493988209  | --G-L---PY-R-R--   | AARL-NS-T--EKRR-GEL-R-V-TE-SV--        |
|                                | <i>Thermovibrio ammonificans</i>           | 319789539  | --V-L---PY-----P   | AAAMPDQ-S-DEKKK-AE--RTL-T--REA-        |
|                                | <i>Syntrophus aciditrophicus</i>           | 85860140   | --V-SL---PY-R-E--A | AARMERGQ-DGK-IR--AE--R-V---RRS-        |
|                                | <i>Geobacter metallireducens</i>           | 404495733  | -----L---PF-Q---P  | AATMTPQ-H-K-IKE-AEA-RVLS--KSDY         |
|                                | <i>Geobacter bemidjiensis</i>              | 197118030  | -----PF-P-S--P     | AATMEGH-HSS-IKE-AKA-RKLS-E-KKS-        |
|                                | <i>Geobacter daltonii</i>                  | 222055074  | ---T-L---PF-P---P  | AADMPGRIPGDETKK-ARL-QD--T--RRQ-        |
|                                | <i>Syntrophobacter fumaroxidans</i>        | 116747616  | --V-----PF-P-T--P  | AATMGDH-RSS-IKE-AKA-RKLS-E-KKAY        |
|                                | <i>Geobacter uraniireducens</i>            | 148263556  | --FS-----Y-S---A   | AARLEQIS-A-IRQ--KA-S-LSRT--LA-         |
|                                | <i>Candidatus Nitrospira defluvii</i>      | 302037249  | IGFS-L---PY-K--F-K | ASEMTEQIPENIKRQ-ADC-I-V-K--KL-Y        |
|                                | <i>Thermodesulfovibrio yellowstonii</i>    | 206890255  | ISFSAM---KY-Q-K--P | AAEFSNQIS-KKKDE--EV-I-LSSK-TK--        |
|                                | <i>Acetivibrio cellulosoliticus</i>        | 497937468  | VHFYEM-I-KY-R-K--  | ADKMEQ--DT-K-E--V-LALEKAQSL-Y          |
|                                | <i>Eubacterium eligens</i>                 | 238917088  | INF-AM---KY-Q-K--P | AANFENQ-S--KKEE--N--L-LSA-MTR--        |
|                                | <i>Clostridium clariflavum</i>             | 374295594  | --FT-L---TY-P-K--T | AFAMKNN-PKTDKKE-NRR-T-L-RD--LT-        |
|                                | <i>Nitrospina gracilis</i>                 | 491153350  | S--NWL-I-PF-L---F  | AEKLNSKIPQ-EIEN-KK---NLI-G-REK-        |
|                                | <i>Thermodesulfovibrio geofontis</i>       | 337288075  | VGFGHL-I-Y--E--K   | AA-LPGQ--EP-KKQ--QT-H---LMKQ-W         |
|                                | <i>Thiothrix nivea</i>                     | 488795658  | --IS-L---TY-E--N-H | ALSI-PI-PGN-RAE--KM-HILSDK-RRR-        |
|                                | <i>Rudanella lutea</i>                     | 518831224  | -DIS-L---TY-E--N-E | AIELEGV-PMK-RNQ--KM-RGLSHK-KRA-        |
|                                | <i>Flexithrix dorotheae</i>                | 522017869  | --VS-L---TY-E--N-L | ALEIKPV-PLSQRAE--KM-HILSDK-RRR-        |
|                                | <i>Runella slithyformis</i>                | 338213581  | --VS-L---TY-E--N-D | ADEMDEV-PMK-RNE--KM-RSLS-K-KRA-        |
|                                | <i>Marivirga tractuosa</i>                 | 313674192  | --VS-L---TY-E-AN-R | AVEMEGV-PMKKRNE--KM-RILS-K-KRQ-        |
|                                | <i>Cyclobacteriaceae bacterium</i>         | 499123756  | -DISQL---Y-E---Q   | ALKIAHS-D-K-KHA--QQ-LD-SD--LHA-        |
|                                | <i>Parabacteroides goldsteinii</i>         | 494928094  | -DIS-L---TY-E-AN-L | ATEMKEV-PVN-RHE-NKK-RNLSYM-MS-H        |
|                                | <i>Segetibacter koreensis</i>              | 517440681  |                    |                                        |

Figure S38

Partial sequence alignment of the MiaB-like tRNA modifying protein, showing a 5 aa insertion (boxed) that is specific for members belonging to the family *Chlorobiaceae*.

|                                         |                                        | 262                | 312                        |
|-----------------------------------------|----------------------------------------|--------------------|----------------------------|
| Family<br><i>Chlorobiaceae</i>          | <i>Chlorobium limicola</i>             | WP_041465658       | EGMVSFKALLFLPKEAPPELLYRQSE |
|                                         | <i>Chlorobium phaeovibrioides</i>      | WP_126383222       | --A-----QN--M-----G-       |
|                                         | <i>Chlorobium luteolum</i>             | WP_011358007       | -A-----I-----M-----G-      |
|                                         | <i>Candidatus Chlorobium masyuteum</i> | WP_166808743       | -----S-----G-              |
|                                         | <i>Chlorobium ferrooxidans</i>         | WP_040433047       | -----S-----G-              |
|                                         | <i>Chlorobaculum limnaeum</i>          | WP_069809908       | --A-----I-S--M---N-GA      |
|                                         | <i>Pelodictyon phaeoclathratiforme</i> | WP_012508305       | ---T-----M-----G-          |
|                                         | <i>Prosthecochloris vibrioformis</i>   | WP_068867009       | --V-----I-Q---MDM-Q-GA     |
|                                         | <i>Chlorobaculum tepidum</i>           | WP_010932510       | -A-----I-S--M---N-GA       |
|                                         | <i>Chlorobaculum thiosulfatiphilum</i> | WP_139457868       | -A-----I-S--MD--N-GA       |
|                                         | <i>Chlorobaculum parvum</i>            | WP_012502101       | --V-----I-S--M---Q-GA      |
|                                         | <i>Prosthecochloris ethylica</i>       | WP_175187146       | -A-----MDMM-Q-GA           |
|                                         | <i>Prosthecochloris aestuarii</i>      | WP_012505491       | --V-----MDM-Q-GA           |
|                                         | <i>Chlorobium phaeobacteroides</i>     | WP_011745048       | --K-C-----E-----M--GD      |
| <i>Prosthecochloris marina</i>          | WP_110023524                           | --V-N-----MDM-Q-GA |                            |
| <i>Chloroherpetonaceae</i><br>fam.nov   | <i>Chlorobium sp. N1</i>               | WP_131353572       | -A-----I-----M-----G-      |
|                                         | <i>Chlorobium sp. KB01</i>             | WP_076790368       | -----S-----S-----G-        |
| Larger <i>Ignavibacteriiae</i><br>Clade | <i>Chloroherpeton thalassium</i>       | WP_012501118       | --R-----S-----S--MG--HLKD- |
|                                         | <i>Chlorobi bacterium OLB7</i>         | KXX52223           | --TFEYF---I-SR--MD-FT-EGV  |
| Other Bacteria                          | <i>Ignavibacterium album</i>           | WP_014558883       | DAPIQ-N---I--RSYEFWRWSKDD  |
|                                         | <i>Melioribacter roseus</i>            | WP_041356047       | DAPIQ-N---I--KSDEFFWIDRDN  |
|                                         | <i>Williamsia sterculiae</i>           | WP_076482150       | --SFE-Q---I-SQ--YD-FM-DRA  |
|                                         | <i>Mycobacterium neaurum</i>           | WP_019514778       | --TFEYQ---I-SQ--FD-FN-DGN  |
|                                         | <i>Micrococcus paurometabola</i>       | WP_013128275       | --TFEYQ---I-TMP-FDMF--NTK  |
|                                         | <i>Maledivibacter halophilus</i>       | WP_079492068       | D-L-RYN-I--I-ENM-FDYITKEY- |
|                                         | <i>Chryseobacterium mucoviscidosis</i> | WP_079350953       | D-A-VYN-I--I-ENT-FDYITKEY- |
|                                         | <i>Pedobacter himalayensis</i>         | 00K78077           | --KQEYTS--YI-AQ--WDMWN-DHK |

|                                           |                                           |              |                          |                       |     |
|-------------------------------------------|-------------------------------------------|--------------|--------------------------|-----------------------|-----|
|                                           |                                           |              | 114                      |                       | 156 |
|                                           | <i>Chlorobium limicola</i>                | WP_012466322 | VEKAITPATKAVVAIPMWAPPK   | MVELAAICDRHSIMLIEDAAQ |     |
|                                           | <i>Chlorobaculum limnaeum</i>             | WP_069809335 | -----K-----A--           | -D-I-E--E-RG-T-----   |     |
|                                           | <i>Chlorobaculum parvum</i>               | WP_012502337 | -----K-----A--           | -D---E--E-RGVT-----   |     |
|                                           | <i>Chlorobaculum thiosulfatiphilum</i>    | WP_139456487 | -----K-----A--           | -D-I-E--E-RGVT-----   |     |
|                                           | <i>Chlorobaculum tepidum</i>              | WP_010932823 | -----K-----A--           | -D-I-E--E-RGVT-----   |     |
|                                           | <i>Chlorobium luteolum</i>                | WP_011357713 | -----K-----V---S--       | -D---E--R--NLT-V----- |     |
| Family<br><i>Chlorobiaceae</i>            | <i>Pelodictyon phaeoclathratiforme</i>    | WP_012508220 | -----S-----S--           | -D--S-L-RERGLI-----   |     |
|                                           | <i>Chlorobium ferrooxidans</i>            | WP_006365902 | -----S-----S--           | -D-IS--RK-NLI-----    |     |
|                                           | <i>Chlorobium phaeobacteroides</i>        | WP_011745346 | -----S-----S--           | -D-----QSNLI-----     |     |
|                                           | <i>Chlorobium phaeovibrioides</i>         | WP_126383305 | -QQ--EK----VV---A--      | -K--QD--T-RG-I-----   |     |
|                                           | <i>Prosthecochloris aestuarii</i>         | WP_012505602 | --R-LSSK-----Q           | -D--S-L---GLV-----    |     |
|                                           | <i>Prosthecochloris ethylica</i>          | WP_114607013 | --R-V-GR-----V-----R     | -D---EV-R--ELV-----   |     |
|                                           | <i>Chlorobium sp. N1</i>                  | WP_131353344 | --R---K-----V---S--      | -D--E---G--NLT-V----- |     |
|                                           | <i>Candidatus Chlorobium masyuteum</i>    | WP_166808209 | -----E-----S--           | -D-IS--RK-NLI-----    |     |
|                                           | <i>Chlorobium sp. KB01</i>                | WP_076789499 | -----S-----S--           | -D-IS--RK-NLI-----    |     |
|                                           | <i>Chloroherpeton thalassium</i>          | WP_012499985 | I-A---K--VI-PVHLYGQ-A A  | LD-IHQ-AEK-GLEV-----  |     |
| <i>Chloroherpetonaceae</i><br>fam.nov     | <i>Cand Thermochlorobacter aerophilum</i> | RFM23378     | I-AE---Q---ILPVHLYGQAA E | IDKIVE-AT--G-AV---N-- |     |
| Larger<br><i>Ignavibacteriae</i><br>Clade | <i>Chlorobi bacterium OLB5</i>            | KXK50680     | ISRLV--K-R---VVHYGGIAC R | -D-ICK-T--YGLY-----   |     |
|                                           | <i>Chlorobi bacterium OLB4</i>            | KXK03854     | I--H--E---IIPVHLFGL-V A  | -DIILE-AR-YKLKVV--S-  |     |
|                                           | <i>Ignavibacterium album</i>              | WP_014561297 | --A---SR---I--VHLYGQ-A D | -DP-RE-SKAKN-H-V--C-- |     |
|                                           | <i>Melioribacter roseus</i>               | WP_014856915 | I--K--K---IIPVHLYGQSA E  | -D-IMEVARK-NLYV--G--  |     |
|                                           | <i>Cand Kapabacteria thiocyanatum</i>     | OJX57644     | -RA---R-R-I-PVHLFGQSA D  | -DA-V--ATEAG-PIV----- |     |
| Other Bacteria                            | <i>Salinicoccus albus</i>                 | WP_020008201 | ---IIVNLYGQSA K          | -D--VD--N-YGVPIV----E |     |
|                                           | <i>Corynebacterium aquilae</i>            | WP_075728003 | --A---DK---MPVHLYGL-A N  | -PA-RE---KRGL--F--S-- |     |
|                                           | <i>Nitrosospira briensis</i>              | WP_051536689 | -RQ-L--Q---I-VHLFGE-V D  | LAP-QQF-ES-GLS-----   |     |
|                                           | <i>Flavobacterium silvaticum</i>          | WP_169525655 | -K-----K-R--L-VHLYGRLA L | -D--D---KQNNLL-----   |     |
|                                           | <i>Confluentibacter lentus</i>            | WP_100612968 | -----K---MVVQ-CGSMG D    | -DA-QS--KAYNVL----C-  |     |
|                                           | <i>Luteibaculum oceani</i>                | WP_147014132 | --SK---K---II-VHIYGLTS N | LKR-RE---KKG-I-----E  |     |
|                                           | <i>Confluentibacter flavum</i>            | WP_106659310 | -----K---MVVQ-CGSMG N    | -DA-QR--NA-NVF-----C- |     |
|                                           | <i>Muriicola jejuensis</i>                | WP_163691610 | -R---K---I-PVHLFGQCA P   | -D--LE-AEE-GLF---N--  |     |
|                                           | <i>Pontibacter burrus</i>                 | WP_163915187 | ---L--SK---I-VVHLYGQAC E | -D-ILQL-E-Y-LK-----   |     |
|                                           | <i>Galbibacter marinus</i>                | WP_008991889 | -----N--VIMPVH-CGSMA R   | LK--K---K-GLL-L---C-  |     |
|                                           | <i>Mariniflexile fucanivorans</i>         | WP_132219451 | -----K---IMVVH-CGSMA N   | -DA-QN--SK--LL----C-  |     |
|                                           | <i>Prolixibacter bellariivorans</i>       | WP_025864104 | I-----R---LL-QVFGSMG R   | -D-IVEV-RKNNLK-----   |     |
|                                           | <i>Fulvivirga imtechensis</i>             | WP_009581965 | -KE---R---I-VHLYGL-C R   | -D-IM--A--YN-KV---C-- |     |
|                                           | <i>Chitinophaga pinensis</i>              | WP_148230802 | I-----K---I-PVHIYQCA D   | -DAIM--AEK-GLHV---T-  |     |

Figure S40

Partial sequence alignment of the DegT/DnrJ/EryC1/StrS family aminotransferase protein, showing a 1 aa deletion (boxed) that is specific for the family *Chlorobiaceae*.

|                            |                                        |            |                      |                           |     |
|----------------------------|----------------------------------------|------------|----------------------|---------------------------|-----|
|                            |                                        |            | 238                  |                           | 279 |
|                            | <i>Chlorobium phaeoclathratiforme</i>  | 194336576  | KKLKIIPTHTVGSYELVG   | GKTSSLLLVRLDESAFWQKSRCLVI |     |
|                            | <i>Chlorobium ferrooxidans</i>         | 493409890  | -RI--V-----          | -----I--N-----            |     |
|                            | <i>Chlorobaculum tepidum</i>           | 21674004   | R-HV-----K-----      | -----I-N-AE--K-----       |     |
|                            | <i>Chlorobium chlorochromatii</i>      | 78188793   | QS-T-----R-----A-    | -----VI-N-RE-----         |     |
|                            | <i>Chlorobium phaeobacteroides</i>     | 119357337  | -N--V-----R-----A-   | -N--M--I-N-NE--K-----L    |     |
|                            | <i>Prosthecochloris aestuarii</i>      | 194333827  | -N--V-----TD--MI-    | -ES-A--I--NE--K-----      |     |
|                            | <i>Chlorobium limicola</i>             | 189346919  | QN-----T-----A-      | -S-----INN-QE--K-----     |     |
|                            | <i>Chlorobaculum limnaeum</i>          | 2501894719 | NR-H-V-----K-----    | -----I--I-N-VE--K-----I-  |     |
|                            | <i>Prosthecochloris marina</i>         | 110021887  | -N-R-----K-----      | -R-----IT--E--K-----      |     |
|                            | <i>Chlorobaculum thiosulfatophilum</i> | 139456507  | SR-H-----K--T---     | ----A--I-N-AE--K-----I-   |     |
|                            | <i>Prosthecochloris vibrioformis</i>   | 139626512  | -S-R-V--SID---IE     | -GN-----IK--NE--R-----    |     |
|                            | <i>Chlorobium sp. KB01</i>             | 076789444  | -RI--V-----          | -----I--N-----            |     |
| <b>Family</b>              | <b><i>Chlorobiaceae</i></b>            |            |                      |                           |     |
|                            | <i>Chloroherpeton thalassium</i>       | 193216023  | QVELL-S-SKD---IKK D  | -ENA-V-QIK-AKE--K-AK----  |     |
|                            | <i>Porphyromonas gulae</i>             | 517795839  | --ANVL-S-PAS---IR G  | TDKMLT-RIK-PQ---KN-KI---  |     |
|                            | <i>Porphyromonas gingivalis</i>        | 334146329  | --ANVL-S-PAS---IR G  | TDKMLT-RIK-PQ---KN-KM---  |     |
|                            | <i>Alistipes shahii</i>                | 479187696  | --ATLV-S-PE-----T D  | ANKVVEK-IITDPVRFWE-SKIL-  |     |
|                            | <i>Odoribacter laneus</i>              | 496428340  | --A-VLSV-PQD--A-EA G | EDGMLS-T-K--NS--KQTKY--V  |     |
|                            | <i>Bacteroides sp. HPS0048</i>         | 488622481  | -RAELL-T-P-----K D   | D-GQLT-KITNPKE--SV--Y---  |     |
|                            | <i>Bacteroides massiliensis</i>        | 511024358  | -RAELL-T-PA-----K D  | A-GQLT-KITNPTE--SV--Y---  |     |
|                            | <i>Flexithrix dorotheae</i>            | 522022264  | --AEL--S-PE--KIE- S  | D-KV-K-VIL-PEK--NS-KY--V  |     |
|                            | <i>Bacteroides vulgatus</i>            | 150004391  | -RAELL-T-PA-----K D  | A-GQLT-KITNPTE--SV--Y---  |     |
|                            | <i>Prevotella ruminicola</i>           | 294674538  | -DA-VL-S-PAS--R-TA D | ANKQLI-RIN-PI---ST-KY---  |     |
|                            | <i>Porphyromonas somerae</i>           | 516662532  | -A-VL-E-PSS---IK D   | -NKNMI-KIK-VDS--SLG-N--V  |     |
|                            | <i>Odoribacter splanchnicus</i>        | 325281781  | --A-LLSV-PAD--T-ET G | EDGNMT-KIN--NN--KQTKY--V  |     |
|                            | <i>Coprobacter fastidiosus</i>         | 550260015  | --A--L-N-PE---S--K N | D-GLLT-VIS-PQN--SL-KY--V  |     |
|                            | <i>Bacteroides barnesi</i>             | 517541810  | -RAELL-N-PS-----K D  | D-GQLT-KITNPKE--SV--Y---  |     |
| <b>Family</b>              | <b><i>Chlorobiaceae</i></b>            |            |                      |                           |     |
| <b>Chloroherpetonaceae</b> | <b>fam.nov.</b>                        |            |                      |                           |     |
| <b>Other Bacteria</b>      |                                        |            |                      |                           |     |

Figure S41

Partial sequence alignment of the biogenesis of lysosome-related organelles complex 1 subunit 2 protein, showing a 1 aa deletion (boxed) that is specific for the family *Chlorobiaceae*.

|                                            |                                        |                                              |                |                       |                       |                |
|--------------------------------------------|----------------------------------------|----------------------------------------------|----------------|-----------------------|-----------------------|----------------|
|                                            |                                        |                                              | 234            |                       | 268                   |                |
| Family<br><i>Chlorobiaceae</i>             | <i>Chlorobium phaeoclathratiforme</i>  | 194335275                                    | GRGKVVIRARAIVE | I                     | TPKNSRESIVVTETLPYQVVK |                |
|                                            | <i>Chlorobium luteolum</i>             | 78185988                                     | -----LI-       | V                     | -Q--G-----            |                |
|                                            | <i>Chlorobaculum parvum</i>            | 193211771                                    | -----V-        | V                     | -Q--G---I-----        |                |
|                                            | <i>Prosthecochloris aestuarii</i>      | 194332984                                    | -----V-        | V                     | -Q--G-----            |                |
|                                            | <i>Chlorobium limicola</i>             | 189345659                                    | -----L-        | V                     | -Q--G---I-----        |                |
|                                            | <i>Chlorobium ferrooxidans</i>         | 493411439                                    | -----L-        | V                     | -Q--G---I-----        |                |
|                                            | <i>Chlorobaculum tepidum</i>           | 21672982                                     | -----V-        | V                     | -Q--G---I-----        |                |
|                                            | <i>Chlorobium chlorochromatii</i>      | 78188072                                     | -----L-        | V                     | -Q--G---I-----        |                |
|                                            | <i>Chlorobium phaeovibrioides</i>      | 145218988                                    | -----L-        | V                     | -Q--G-----            |                |
|                                            | <i>Chlorobium phaeobacteroides</i>     | 119358427                                    | -----L-        | V                     | -Q--G---I-----        |                |
|                                            | <i>Chlorobaculum thiosulfatiphilum</i> | 139456349                                    | -----L-        | V                     | -Q--G---I-----        |                |
|                                            | <i>Prosthecochloris marina</i>         | 110024210                                    | ---R-----V-    | V                     | -Q--G---I-----        |                |
|                                            | <i>Chlorobaculum limnaeum</i>          | 2501895269                                   | -----V-        | V                     | -Q--G---I-----        |                |
|                                            | <i>Chlorobium</i> sp. N1               | 131355716                                    | -----L-        | V                     | -Q--G-----            |                |
|                                            | <i>Chlorobium</i> sp. KB01             | 076791893                                    | -----L-        | V                     | -Q--G---I-----        |                |
|                                            | <i>Chlorobaculum</i> sp. 24CR          | 129050649                                    | -----L-        | V                     | -Q--G---I-----        |                |
|                                            | <i>Candidatus Chlorobium masyuteum</i> | 166807315                                    | -----L-        | V                     | -Q--G---I-----        |                |
|                                            | <i>Chloroherpetonaceae</i><br>fam.nov. | <i>Chloroherpeton thalassium</i>             | 193213726      | ---I-L--KVQ-          | V                     | ---G---II----- |
|                                            |                                        | <i>Cand. Thermochlorobacteriaceae GBCh1B</i> | KER09680       | ---LT--KVNI-          | V                     | N--D--T-----   |
|                                            |                                        | <i>Chlorobium</i> sp. 445                    | PI047609       | ---IT---VKI-          | EN-                   | G--A-----      |
| <i>Cand. Thermochlorobacter aerophilum</i> |                                        | RFM25354                                     | ---IT--KVKI-   | EN-                   | G-----                |                |
| Larger<br><i>Ignavibacteriae</i><br>Clade  | <i>Chlorobi bacterium OLB5</i>         | KXK50861                                     | ---II--K-GI-   | VG-GD---              | II-----               |                |
|                                            | <i>Melioribacter roseus</i>            | 397690040                                    | ---IT---NI-    | -L--D--N-             | I-----                |                |
|                                            | <i>Ignavibacterium album</i>           | 385808592                                    | ---RILL--K-N-  | -L--D--N-             | II--I-----            |                |
|                                            | <i>Cronobacter sakazakii</i>           | 213200884                                    | ---IY---E-     | V D--G--T-I-H-I-      | -----                 |                |
|                                            | <i>Thiocapsa roseopersicina</i>        | 093027529                                    | ---RA-----TM-  | V QKRS-G--A-          | -----                 |                |
|                                            | <i>Arsenophonus nasoniae</i>           | CBA76530                                     | -----Y-----NI- | V DD--G--T-I-N-I-     | -----                 |                |
|                                            | <i>Providencia heimbachae</i>          | 068444842                                    | -----Y-----E-  | V DE--G--T-I-H-I-     | -----                 |                |
|                                            | <i>Plesiomonas shigelloides</i>        | 039045661                                    | -----YL---E-   | V DE--G---I-H-I-      | -----                 |                |
|                                            | <i>Thiocapsa imhoffii</i>              | 200388422                                    | ---R--M---TL-  | V QKRS-G--A-          | -----                 |                |
|                                            | <i>Mariprofundus ferrooxydans</i>      | 009850567                                    | ---S-TM-----V  | N-RTH-Q-LII-          | -----                 |                |
| Other Bacteria                             | <i>Cronobacter dublinensis</i>         | 161586000                                    | ---IY---E-     | V D--G--T-I-H-I-      | -----                 |                |
|                                            | <i>Dickeya undicola</i>                | 123249807                                    | -----Y-----E-  | A D--SG--T-I-H-I-     | -----                 |                |
|                                            | <i>Pedobacter saltans</i>              | 325103800                                    | ---RI-M--K-EI- | SQS-E--K-I--I-        | -----                 |                |
|                                            | <i>Brucella canis</i>                  | 373088901                                    | ---S-IM-G--TI- | PMRGD--A-II--I-       | -----                 |                |
|                                            | <i>Balneola vulgaris</i>               | 516845266                                    | ---ITL---NT-   | ELRGG--Q--I--I-       | -----                 |                |
|                                            | <i>Gracilimonas tropica</i>            | 521071534                                    | ---ITL---NT-   | ELRGN--Q--I--I-       | -----                 |                |
|                                            | <i>Pedobacter arcticus</i>             | 515827893                                    | ---R-MM-GV-EI- | -LP-D--R-I-S-I-       | -----                 |                |
|                                            | <i>Thermopagus xiamenensis</i>         | 498214077                                    | ---RI---KTEI-  | SD-DG--R--I--I--M--   | -----                 |                |
|                                            | <i>Joostella marina</i>                | 495891560                                    | ---RI-M--K-HN- | EV-G--C-----I-        | -----                 |                |
|                                            | <i>Zhouia amylolytica</i>              | 568804980                                    | ---R--L--K-EI- | EV-GK-C-----I-        | -----                 |                |
|                                            | <i>Galbibacter marinus</i>             | 496279386                                    | ---RI-M--K-RI- | EVKG--C-I--I--I-      | -----                 |                |
|                                            | <i>Hymenobacter norwichensis</i>       | 551195584                                    | ---R--V--K-H-  | -LDSGK-Q-----I--M--   | -----                 |                |
|                                            | <i>Psychroflexus torquis</i>           | 408492625                                    | ---R--M--KSS-  | EV-G--C-II--I--I-     | -----                 |                |
|                                            | <i>Rhodothermus marinus</i>            | 345302554                                    | ---RIL---IHE-  | EIRPG-MAL-I--I--I-    | -----                 |                |
|                                            | <i>Flavobacterium cauense</i>          | 559195123                                    | ---RI-M--K-NF- | EVDG---I--I--I-       | -----                 |                |
|                                            | <i>Marinilabilia salmonicolor</i>      | 498348651                                    | ---RI---KSEI-  | ADN-G--K--I--I--M--   | -----                 |                |
|                                            | <i>Psychroflexus tropicus</i>          | 517868593                                    | ---R--M--K-DI- | EIKG--CM-----I-       | -----                 |                |
|                                            | <i>Flavobacterium saliperosum</i>      | 559200282                                    | ---RI-M--K-NF- | EVDG---I--I--I-       | -----                 |                |
|                                            | <i>Anaerophaga thermohalophila</i>     | 498104611                                    | ---RI---KTEI-  | -D-SG--R-II--I--M--   | -----                 |                |
|                                            | <i>Arcticibacter svalbardensis</i>     | 510820181                                    | ---R---K-LI-   | -YGH-D--R--N-I--I--I- | -----                 |                |
|                                            | <i>Flavobacterium indicum</i>          | 383450158                                    | ---RI-M--K-GF- | EV-G---I--I--I--I-    | -----                 |                |
|                                            | <i>Psychroflexus gondwanensis</i>      | 489533711                                    | ---R--M--KSS-  | EV-GK--LII--I--I-     | -----                 |                |
|                                            | <i>Anaerophaga thermohalophila</i>     | 515147163                                    | ---RI---KTEI-  | -D-TG--R-II--I--M--   | -----                 |                |
|                                            | <i>Muricauda ruestringensis</i>        | 344203768                                    | ---R--M--K-TI- | EVQKG-----I--I--I-    | -----                 |                |
|                                            | <i>Rhodothermus marinus</i>            | 268317740                                    | ---RIL---IHE-  | EIRPG-MAL-I--I--I-    | -----                 |                |
|                                            | <i>Aequorivita sublithincola</i>       | 390955544                                    | ---R--M--K-TF- | EVQG--C-I--I--I--I-   | -----                 |                |
|                                            | <i>Cellulophaga lytica</i>             | 325287312                                    | ---R--M--K-TF- | EVQG-----I--I--I-     | -----                 |                |
|                                            | <i>Flavobacterium rivuli</i>           | 519055916                                    | ---RI-V--KTSF- | EVDG--C-I--I--I--I-   | -----                 |                |
|                                            | <i>Polaribacter franzmannii</i>        | 517774671                                    | ---RI-M--K--I- | EVKG--C-I--I--I--I-   | -----                 |                |
|                                            | <i>Alistipes putredinis</i>            | 490458409                                    | ---R--M--TEI-  | HTASG--C--I--I--M--   | -----                 |                |
|                                            | <i>Amorphus coralli</i>                | 517527837                                    | ---S-TM-GKVA-- | -TGRD--ALII--I--I--I- | -----                 |                |
|                                            | <i>Azorhizobium caulinodans</i>        | 158423952                                    | ---SIMM---TI-  | -VRKE--A-II--I--I--I- | -----                 |                |
|                                            | <i>Brucella abortus</i>                | 145308239                                    | ---S-IM-G--TI- | PMRGD--A-II--I--I--I- | -----                 |                |
|                                            | <i>Gluconobacter oxydans</i>           | 58001765                                     | ---SIPV---EI-  | EIRKD-QA-II--I--I--I- | -----                 |                |
|                                            | <i>Afiopia birgiae</i>                 | 518026837                                    | ---SI-M-GKVNI- | -IRKD--A-I-S-I--I--I- | -----                 |                |
|                                            | <i>Acetobacter tropicalis</i>          | 493605115                                    | ---AII---E--   | EIRKD-KA--I--I--I--I- | -----                 |                |
|                                            | <i>Bacillus amyloliquefaciens</i>      | 566079334                                    | ---SIT---K-EI- | ETSSGK-R-I--I--I--I-  | -----                 |                |
|                                            | <i>Bacillus licheniformis</i>          | 117654167                                    | ---SIT---K-QI- | ETSSGKQV-II--I--I--I- | -----                 |                |
|                                            | <i>Cyprideis torosa</i>                | CAD7231638                                   | -----N--       | SH--D---II---F---     | -----                 |                |

Figure S42

Partial sequence alignment of the protein DNA gyrase subunit A, showing a 1 aa insertion (boxed) that is specific for members belonging to the family *Chlorobiaceae*. The CSI is not present in any other bacterial species except for the nine other bacteria as indicated above, in the top 500-BLASTp hits.

|                                                  |                                          |              | 30                | 64                |
|--------------------------------------------------|------------------------------------------|--------------|-------------------|-------------------|
| <b>Chloroherpetonaceae</b><br>fam.nov.           | <i>Chloroherpeton thalassium</i>         | WP_012500714 | AIRASQLGYKTCIEKE  | TLGGVCLNWGCIPTKSL |
|                                                  | <i>Cand. Thermochlorobacter aerophil</i> | RFM24380     | -----V----        | -----P-----       |
|                                                  | <i>Cand. Thermochlorobacter GBCh1B</i>   | KER08989     | ---A---F---V---   | -----P-----       |
|                                                  | <i>Chlorobium sp. 445</i>                | PI048610     | -----V----        | -----P-----       |
| <b>Family</b><br><b>Chlorobiaceae</b>            | <i>Chlorobaculum tepidum</i>             | WP_010932967 | --H-ARY-L---V--A  | V----V-----A-     |
|                                                  | <i>Pelodictyon phaeoclathratiforme</i>   | WP_012508516 | -L--AKA-M-V-L---G | A----V-----A-     |
|                                                  | <i>Chlorobium ferrooxidans</i>           | WP_006366348 | -L-GAKA-M-V-----A | A----I-----A-     |
|                                                  | <i>Chlorobium phaeobacteroides</i>       | MBC8524564   | -VK-A-S-LQV--V--G | AI---V-----A-     |
|                                                  | <i>Prosthecochloris ethylica</i>         | WP_175186716 | -L--AGE-LRV--V--G | P----V-----A-     |
|                                                  | <i>Chlorobaculum tepidum</i>             | AAG12404     | --H-ARY-L---V--A  | V----V-----A-     |
|                                                  | <i>Prosthecochloris aestuarii</i>        | WP_012505992 | -V--ARK-LTV----RG | A----V-----A-     |
|                                                  | <i>Prosthecochloris vibrioformis</i>     | CAB06298     | -LH-ARH-M-V-LV--R | S----V-----A-     |
|                                                  | <i>Chlorobaculum parvum</i>              | WP_012501976 | -LH-ARH-M-V-LV--A | S----V-----A-     |
|                                                  | <i>Candidatus Chlorobium masyuteum</i>   | WP_166808580 | -L-GAKA-M-V-----A | A----I-----A-     |
|                                                  | <i>Chlorobi bacterium NICIL-2</i>        | KXB98049     | ---A---M--IC--RD  | R-----S-A-        |
|                                                  | <i>Prosthecochloris sp. ZM</i>           | WP_114617058 | -V--ARK-LTV----RG | A----V-----A-     |
|                                                  | <i>Chlorobium sp. KB01</i>               | WP_076789414 | -L-GAKA-M-V-----A | A----I-----A-     |
|                                                  | <i>Prosthecochloris sp. ZM_2</i>         | WP_114607234 | -L--AGE-LRV--V--G | P----V-----A-     |
| <b>Larger</b><br><b>Ignavibacteriae</b><br>Clade | <i>Ignavibacteria bacterium</i>          | MBK9333167   | -----F--A---D     | R---I-----A-      |
|                                                  | <i>Chlorobi bacterium OLB7</i>           | KXK57232     | -----L--A-V-RD    | R---I-----A-      |
|                                                  | <i>Chlorobi bacterium OLB5</i>           | KXK46273     | -----L--ALV-TA    | R---I-----S---    |
|                                                  | <i>Chlorobi bacterium OLB6</i>           | KXK33210     | -----L-VACV-RD    | R-----S---        |
| <b>Other Bacteria</b>                            | <i>Bizionia paragorgiae</i>              | WP_092133119 | -----F--A-----    | S-----A-          |
|                                                  | <i>Chryseobacterium indologenes</i>      | HA026821     | ---A---F--A-----  | N---I-----A-      |
|                                                  | <i>Salinimicrobium marinum</i>           | WP_189603939 | -----F--A-----    | S-----A-          |
|                                                  | <i>Salegentibacter salinarum</i>         | WP_079714361 | -----F--A-----    | S-----A-          |
|                                                  | <i>Muricauda aquimarina</i>              | WP_127139765 | -----F--A-----    | S-----A-          |
|                                                  | <i>Stylophora pistillata</i>             | PFX17179     | -----F--A-----    | S-----A-          |
|                                                  | <i>Aquimarina celericrescens</i>         | MBQ0733288   | -----F--A-----    | S-----A-          |
|                                                  | <i>Salinimicrobium sediminis</i>         | WP_097057020 | -----F--A-----    | S-----A-          |
|                                                  | <i>Flavobacterium johnsoniae</i>         | WP_121360554 | -----F--A-V---    | N-----A-          |
|                                                  | <i>Winogradskyella jejuensis</i>         | WP_073086302 | -----F--A-----    | S-----A-          |
|                                                  | <i>Cellulophaga tyrosinoxydans</i>       | WP_084061203 | -----F--A-----    | S-----A-          |
|                                                  | <i>Tenacibaculum dicentrarchi</i>        | WP_101902757 | -----F--A-----    | N---I-----A-      |
|                                                  | <i>Bizionia myxarmorum</i>               | WP_148403574 | -----F--A-----    | S-----A-          |

Figure S43

Partial sequence alignment of the protein hypoxanthine phosphoribosyltransferase protein showing a one amino acid insertion (boxed) that is exclusively shared by all members of the "*Chloroherpetonaceae*" clade.

|                                        |                                            |              | 30                |   | 64               |
|----------------------------------------|--------------------------------------------|--------------|-------------------|---|------------------|
| <b>Chloroherpetonaceae</b><br>fam.nov. | <i>Chloroherpeton thalassium</i>           | WP_012500714 | AIRASQLGYKTCIEKE  | Q | TLGGVCLNWGCIPKSL |
|                                        | <i>Cand. Thermochlorobacter aerophilum</i> | RFM24380     | -----V-----       | P | -----            |
|                                        | <i>Cand. Thermochlorobacter GBCh1B</i>     | KER08989     | ---A---F---V---   | P | -----            |
|                                        | <i>Chlorobium</i> sp. 445                  | PI048610     | -----V-----       | P | -----            |
|                                        | <i>Chlorobaculum tepidum</i>               | WP_010932967 | --H-ARY-L---V--A  |   | V-----V-----A-   |
|                                        | <i>Pelodictyon phaeoclathratiforme</i>     | WP_012508516 | -L--AKA-M-V-L---G |   | A-----V-----A-   |
|                                        | <i>Chlorobium ferrooxidans</i>             | WP_006366348 | -L-GAKA-M-V-----A |   | A-----I-----A-   |
|                                        | <i>Chlorobium phaeobacteroides</i>         | MB08524564   | -VK-A-S-LQV--V--G |   | AI----V-----A-   |
|                                        | <i>Prosthecochloris ethylica</i>           | WP_175186716 | -L--AGE-LRV--V--G |   | P-----V-----A-   |
|                                        | <i>Chlorobaculum tepidum</i>               | AAG12404     | --H-ARY-L---V--A  |   | V-----V-----A-   |
|                                        | <i>Prosthecochloris aestuarii</i>          | WP_012505992 | -V--ARK-LTV----RG |   | A-----V-----A-   |
|                                        | <i>Prosthecochloris vibrioformis</i>       | CAB06298     | -LH-ARH-M-V-LV--R |   | S-----V-----A-   |
|                                        | <i>Chlorobaculum parvum</i>                | WP_012501976 | -LH-ARH-M-V-LV--A |   | S-----V-----A-   |
|                                        | <i>Candidatus Chlorobium masyuteum</i>     | WP_166808580 | -L-GAKA-M-V-----A |   | A-----I-----A-   |
|                                        | <i>Chlorobi bacterium NICIL-2</i>          | KXB98049     | ---A---M--TC--RD  |   | R-----S-A-       |
|                                        | <i>Prosthecochloris</i> sp. ZM             | WP_114617058 | -V--ARK-LTV----RG |   | A-----V-----A-   |
|                                        | <i>Chlorobium</i> sp. KB01                 | WP_076789414 | -L-GAKA-M-V-----A |   | A-----I-----A-   |
|                                        | <i>Prosthecochloris</i> sp. ZM_2           | WP_114607234 | -L--AGE-LRV--V--G |   | P-----V-----A-   |
|                                        | <i>Chlorobi bacterium OLB7</i>             | KXK57232     | -----L--A-V-RD    |   | R---I-----A-     |
|                                        | <i>Chlorobi bacterium OLB5</i>             | KXK46273     | -----L--ALV-TA    |   | R---I-----S---   |
|                                        | <i>Chlorobi bacterium OLB6</i>             | KXK33210     | -----L-VACV-RD    |   | R-----S---       |
|                                        | <i>Ignavibacteria bacterium</i>            | MBK9333167   | -----F--A----D    |   | R---I-----A-     |
|                                        | <i>Flavobacterium columnare</i>            | WP_213068832 | -----F-VA-----    | N | S---I-----A-     |
|                                        | <i>Bizionia paragorgiae</i>                | WP_092133119 | -----F--A-----    |   | S-----A-         |
|                                        | <i>Chryseobacterium indologenes</i>        | HA026821     | ---A---F--A-----  |   | N---I-----A-     |
|                                        | <i>Salinimicrobium marinum</i>             | WP_189603939 | -----F--A-----    |   | S-----A-         |
|                                        | <i>Salagentibacter salinarum</i>           | WP_079714361 | -----F--A-----    |   | S-----A-         |
|                                        | <i>Muricauda aquimarina</i>                | WP_127139765 | -----F--A-----    |   | S-----A-         |
|                                        | <i>Stylophora pistillata</i>               | PFX17179     | -----F--A-----    |   | S-----A-         |
|                                        | <i>Aquimarina celericrescens</i>           | MBQ0733288   | -----F--A-----    |   | S-----A-         |
|                                        | <i>Salinimicrobium sediminis</i>           | WP_097057020 | -----F--A-----    |   | S-----A-         |
|                                        | <i>Flavobacterium johnsoniae</i>           | WP_121360554 | -----F--A-V---    | N | -----A-          |
|                                        | <i>Winogradskyella jejuensis</i>           | WP_073086302 | -----F--A-----    |   | S-----A-         |
|                                        | <i>Cellulophaga tyrosinoydans</i>          | WP_084061203 | -----F--A-----    |   | S-----A-         |
|                                        | <i>Tenacibaculum dicentrarchi</i>          | WP_101902757 | -----F--A-----    | N | ---I-----A-      |
|                                        | <i>Bizionia myxarmorum</i>                 | WP_148403574 | -----F--A-----    |   | S-----A-         |

Figure S44

Partial sequence alignment of the protein dihydrolipoyl dehydrogenase protein containing a 1 aa insertion (boxed) that is specific for members of the "*Chloroherpetonaceae*" clade.

|                            |                                              |              |                        |      |                      |
|----------------------------|----------------------------------------------|--------------|------------------------|------|----------------------|
|                            |                                              |              | 236                    |      | 280                  |
|                            |                                              |              | TEPVNIGNPDEITILDFAKEVQ | TIVK | ELTGKDTEIIFKELPSDDP  |
| <b>Chloroherpetonaceae</b> | <i>Chloroherpeton thalassium</i>             | WP_012499003 | H---L---S-----         | A--R | ---EIP-VH-P--A---    |
| <b>fam.nov.</b>            | <i>Cand. Thermochlorobacter aerophilum</i>   | RFM24898     | H-----S-----           | A--R | ---EIP-VH-P--A---    |
|                            | <i>Chlorobium</i> sp. 445                    | PIO47888     | H-----S-----           | A--R | ---EIP-VH-P--A---    |
|                            | <i>Cand. Thermochlorobacteriaceae</i> GBCh1B | KER10278     | H-----S-----E-----     | -M-  | -F--REA--T--P--A---  |
| <b>Larger</b>              | <i>Chlorobi bacterium</i> NICIL-2            | KXB98589     | V---L---V-V-EL--QIR    |      | D-V-SSSP-E-HP--E---  |
| <b>Ignavibacteriae</b>     | <i>Chlorobi bacterium</i> OLB7               | KXK55332     | ND-----L-M-EL-Q- IK    |      | N---SSSP-E-RA--K---  |
| <b>Clade</b>               | <i>Ignavibacteria bacterium</i>              | MBD1209187   | -D-----M--L---IL       |      | -I--SKS--V--P--E---  |
|                            | <i>Rhodocaloribacter litoris</i>             | NHZ74744     | V-----S-----R--V       |      | R---SRS--V--P--Q---  |
|                            | <i>Rhodothermus marinus</i>                  | HEK45053     | VG-----E--S--E---II    |      | ---SNS-----P--A---   |
|                            | <i>Rhodohalobacter barkolensis</i>           | WP_101072079 | S---L---E-----II       |      | -I--SKS-VV-----E---  |
|                            | <i>Candidatus Kapabacteria bacterium</i>     | MBL7976002   | SY-----SM--L---II      |      | ---TTSS-E--D--Q---   |
|                            | <i>Rubricoccus marinus</i>                   | WP_094545675 | HD-----VS--E--Q--V     |      | A---SSS--VH-----A--- |
|                            | <i>Aliifodinibius sediminis</i>              | WP_142714759 | -D-----Q-----E--R-II   |      | ---S-S--T-E---K---   |
|                            | <i>Terrimonas ferruginea</i>                 | WP_028787551 | AM-----SL-----IR       |      | Q-S-ERS--V--P--V---  |
|                            | <i>Nonlabens spongiae</i>                    | WP_085767182 | SD-----H-----IV        |      | K---T-QK---D--Q---   |
|                            | <i>Gramella portivictoriae</i>               | WP_026913634 | SD-----S-----II        |      | K---T-QK-V--D--Q---  |
|                            | <i>Fodinibius salinus</i>                    | WP_148897875 | -----Q--S--E---II      |      | D---S-SK-T-E---K---  |
|                            | <i>Patiriisocius marinus</i>                 | WP_151672747 | -H-----S-----Q-II      |      | K---T-QK-V---K---    |
|                            | <i>Rhodohalobacter halophilus</i>            | WP_069132987 | VY-----E-----II        |      | DI--SNSK-V-----E---  |
|                            | <i>Aliifodinibius halophilus</i>             | NGP89105     | V-----S-----E---II     |      | ---ES-S--T-E---K---  |
| <b>Other Bacteria</b>      | <i>Raineyia orbicola</i>                     | WP_101358019 | PY-----L-E---I-        |      | ---SKSK-V--P--K---   |
|                            | <i>Rubrivirga marina</i>                     | WP_095511589 | -D--V---VS-KE--E--V    |      | A---SSST-TYEP-----   |
|                            | <i>Gramella forsetii</i>                     | WP_011711129 | S-----S-----D-II       |      | R---T-QK-V-E---K---  |
|                            | <i>Gramella aestuarii</i>                    | WP_156277031 | SD-----N--S-----R-II   |      | K---T-Q--V-----Q---  |
|                            | <i>Salinibacter altiplanensis</i>            | WP_103020725 | -D-----QE--E--II       |      | -V--T-S--TYEP-----   |
|                            | <i>Microscilla marina</i>                    | WP_045114667 | AH-----S-K--E-II       |      | K---T-QK--Y-D--K---  |
|                            | <i>Salinivenus iranica</i>                   | WP_103038273 | -D-----KE--E--II       |      | -I--S-SP-TYE---K---  |
|                            | <i>Candidatus Moduliflexus flocculans</i>    | GAK54610     | SD-----R-MS--Q--EKIK   |      | AI--TSS--V-EP--V---  |
|                            | <i>Jiulongibacter sediminis</i>              | WP_055143938 | AQ-----N---A--E-II     |      | K---T-QKV-Y-D--K---  |
|                            | <i>Chryseotalea sanaruensis</i>              | WP_127121542 | HL-----Q--E-II         |      | K---T-QK-----K---    |
|                            | <i>Gramella gaetbulicola</i>                 | WP_108170953 | S-----N--S-----D-II    |      | K---T-QR-VY---Q---   |
|                            | <i>Telmatocola sphagniphila</i>              | WP_213494753 | H---L---V---E---L      |      | --S-SKS--VY-P--Q---  |
|                            | <i>Candidatus Fermentibacteria bacterium</i> | MBD3368767   | -G--V---M--E--EF-R     |      | K-G--SR-VHR---K---   |
|                            | <i>Gemmata obscuriglobus</i>                 | WP_010047942 | HD---L---A-----E--IK   |      | K-A-SKS--V--P--Q---  |
|                            | <i>Candidatus Brocadia sinica</i>            | WP_052562761 | YD-----E---HQL---IL    |      | A---SKSR----T--V---  |

Figure S45

Partial sequence alignment of the protein SDR family oxidoreductase, showing a 4 aa insertion (boxed) that is specific for members of the "*Chloroherpetonaceae*" clade

|                                        |                                                 |              |                              |    |                          |
|----------------------------------------|-------------------------------------------------|--------------|------------------------------|----|--------------------------|
| <b>Chloroherpetonaceae</b><br>fam.nov. | <i>Chloroherpeton thalassium</i>                | WP_012499407 | 164<br>YDFRPSYQQIASQLKLIYPKT | RP | 203<br>VMLALTATATEEILKDI |
|                                        | <i>Cand. Thermochlorobacter aerophilum</i>      | RFM23398     | -----K--TGIAQLGLPK           | -- | T-----V-E--              |
| <b>Family</b><br><b>Chlorobiaceae</b>  | <i>Chlorobium</i> sp. 445                       | PI048802     | -----K-TAG-AQLGLPK           | -- | T-----V-E--              |
|                                        | <i>Chlorobium phaeobacteroides</i>              | MBV5319837   | H----D-LSLSQLVT-FPDLP        |    | VA-F----HQVQR--          |
|                                        | <i>Chlorobaculum thiosulfatiphilum</i>          | WP_139456672 | H----D-LALS-IPEVLPGIP        |    | VA-F----RVQH--           |
|                                        | <i>Prosthecochloris marina</i>                  | WP_110024258 | H----D-LSL-ALA--FPGTP        |    | IA-F----HKVQQ--          |
|                                        | <i>Chlorobi bacterium NICIL-2</i>               | KXB98426     | H----RR-GELSGALGR-P          |    | I-----QQTRR--            |
|                                        | <i>Prosthecochloris</i> sp. HL-130-GSB          | WP_198166311 | H----D-RR-VRV-QA-PSNV        |    | PV--T----NDRVVH-V        |
|                                        | <i>Fictibacillus enclensis</i>                  | WP_061970029 | H----LR-KDM-NNL--RP          |    | -IV-----K-VTE--          |
|                                        | <i>Vagococcus silagei</i>                       | WP_136136718 | H----LKL-ETIQV-Q--P          |    | TIV-----P-VAQ--          |
|                                        | <i>Bacillus marasmi</i>                         | WP_147534659 | H----RY-S-I-QH-HS-P          |    | II-----AQVRS--           |
|                                        | <i>Candidatus Gallibacteroides avistercoris</i> | HIU54418     | -----L---QIRH-LPQVP          |    | V-----N-AI---            |
|                                        | <i>Gracilimonas mengyeensis</i>                 | WP_142454845 | H----RE-R-S-ES-ADQ           |    | RW-----P-VQ---           |
|                                        | <i>Ornithinibacillus massiliensis</i>           | WP_211741114 | H----RS-VPT--Q-RNIP          |    | -YM-----VIS--            |
|                                        | <i>Oceanobacillus chungangensis</i>             | WP_115748595 | H----RS-VPN--KLNNIP          |    | -FV-----VIN--            |
|                                        | <i>Virgibacillus dokdonensis</i>                | AUJ24938     | H----RS-IH--QQLPKRP          |    | --M-----T-VIE--          |
|                                        | <i>Virgibacillus chiguensis</i>                 | SHH23913     | H----RS-IP--QQLPKRP          |    | --M-----T-VIE--          |
|                                        | <i>Fictibacillus solisalsi</i>                  | WP_090233596 | H----LR-KDM-NNL--RP          |    | -IV-----K-VTE--          |
|                                        | <i>Peptococcus niger</i>                        | WP_200781888 | H----R--AG-SALT-RP           |    | IFA-----PVQA--           |
|                                        | <i>Bacillus amyloliquefaciens</i>               | KJD52951     | H----RH-E-F-NSLGTRP          |    | -V-----P-VHE--           |
|                                        | <i>Ornithinibacillus californiensis</i>         | WP_047983848 | H----RS-VPN--R-GTIP          |    | -IM-----VIS--            |
|                                        | <i>Ornithinibacillus caprae</i>                 | WP_155671718 | H----RS-VP--Q-RNIP           |    | -YV-----VIS--            |
|                                        | <i>Virgibacillus subterraneus</i>               | WP_092502198 | H----RS-V-N--RLSNIP          |    | --IG-----VIS--           |
|                                        | <i>Virgibacillus salinus</i>                    | SDQ11862     | H----RS-V-N--RLSNIP          |    | --IG-----VIS--           |
|                                        | <i>Spirochaetaceae bacterium</i>                | MBP3450048   | H---E-RR-SEIRQIFPKAV         |    | C-----TVR---             |
|                                        | <i>Enterococcus canintestini</i>                | WP_095006432 | H----L-L-QEI-ALPKRP          |    | AVI-----PQVA---          |
|                                        | <i>Alicyclobacillus ferrooxydans</i>            | WP_206659046 | H----S--PF-EQLDERP           |    | -VV-----P-VTR--          |
|                                        | <i>Litchfieldia alkalitelluris</i>              | WP_078547561 | H----RN-K-MIDSLKD-P          |    | TIV-----K-VIR--          |
|                                        | <i>Oceanobacillus senegalensis</i>              | WP_085993971 | H----RS-V-N--QFTNIP          |    | -IV-----VIN--            |
|                                        | <i>Candidatus Kurthia intestinigallinarum</i>   | HIX42122     | F---E-L---EA-PKER-PI         |    | ---S---NQ-MR--           |
| <b>Other Bacteria</b>                  | <i>Alkalihalobacillus bogoriensis</i>           | WP_035177688 | H----MG-STF-SVLQ--P          |    | -I-----QVQA---           |
|                                        | <i>Flavobacteriales bacterium</i>               | NQY11258     | -----LN-SELR--FKTVP          |    | VM-----K-VV---           |
|                                        | <i>Bacillus alkalicellulosilyticus</i>          | WP_078554038 | H----RS-STYIDSLQ--P          |    | LI-----QVQE--            |
|                                        | <i>Xylanibacillus composti</i>                  | WP_213413892 | H----M--PKL-RQ-H-RP          |    | -VA-F----DKVKE--         |
|                                        | <i>Oceanobacillus caeni</i>                     | WP_204798664 | H----RS-V-T--Q-SNIP          |    | -FV-----VIH--            |
|                                        | <i>Massilia timonae</i>                         | HAK90119     | H---A-IGL-AAIEA-GRPP         |    | V-----D-VIA--            |
|                                        | <i>Gracilimonas amylolytica</i>                 | WP_103665834 | H----RE-R-S-ES-ADN-          |    | RWI-----P-VQ---          |
|                                        | <i>Candidatus Tetrigenococcus pullicola</i>     | HIY56919     | H----LEL-ES--K-E-RP          |    | AII-----PQVS---          |
|                                        | <i>Bacillus paralicheniformis</i>               | WP_145654026 | H----RH-E-F-NSLGTRP          |    | -V-----P-VHE--           |
|                                        | <i>Bacillus licheniformis</i>                   | WP_031314645 | H----RH-EGF-NSLGTRP          |    | -V-----P-VHE--           |
|                                        | <i>Oceanobacillus halophilus</i>                | WP_121204935 | H----RS-V-N--QFSNIP          |    | -FV-----VIS--            |
|                                        | <i>Enterococcus faecium</i>                     | WP_049143502 | H----L-M-N--DQLPNRP          |    | -IV-----VQVAA--          |
|                                        | <i>Bacillus licheniformis CG-B52</i>            | EQM27666     | H----RH-EGF-NSLGTRP          |    | -V-----P-VHE--           |
|                                        | <i>Ornithinibacillus halotolerans</i>           | WP_188383055 | H----RS-VPN--Q-GSIP          |    | -VM-----VIS--            |
|                                        | <i>Enterococcus dispar</i>                      | WP_016173413 | H----L-L-QEI-ALPQRP          |    | AVI-----PQVA---          |
|                                        | <i>Paenibacillus psychroresistens</i>           | WP_155699081 | H----RS-STL--MLPERP          |    | IVA-F----P-VVD--         |
|                                        | <i>Lactobacillus paragasseri</i>                | WP_113576156 | H----A-R--MDGV-S-KSNP        |    | NI-----PSVQ---           |
|                                        | <i>Oceanobacillus limi</i>                      | WP_090872575 | H----RS-VP--QLNNIP           |    | -YV-----VIS--            |
|                                        | <i>Virgibacillus alimentarius</i>               | WP_226371238 | H----RS-VP--QLANIP           |    | -FV-----VIS--            |
|                                        | <i>Priestia megaterium</i>                      | WP_026682619 | H----RS-IP--QLHHAP           |    | IIM-----VIF--            |
|                                        | <i>Loigolactobacillus binensis</i>              | WP_137638398 | H----L-VTAR-QELRT-P          |    | -LV-----RVAT--           |
|                                        | <i>Halobacillus faecis</i>                      | WP_146815185 | H----RS-VPT--K-ANLP          |    | -LM-----Q-VI---          |
|                                        | <i>Paenibacillus hemerocallicola</i>            | WP_139601900 | H----MS-SRV-N--R-RP          |    | -IA-F----DKVKE--         |
|                                        | <i>Paenibacillus mesophilus</i>                 | WP_138881353 | H----MS-SRV-N--R-RP          |    | -IA-F----DKVKE--         |
|                                        | <i>Lactobacillus johnsonii</i>                  | WP_180872720 | H---A-R--MEGV-S-KSQP         |    | NI-----PSVQ---           |
|                                        | <i>Halobacillus karajensis</i>                  | WP_074733221 | H----RS-VPT--E-PNLP          |    | -LM-----Q-VI---          |

Figure S46

Partial sequence alignment of the protein RecQ family ATP-dependent DNA helicase, showing a 2 aa insertion (boxed) that is found specific for members of the "*Chloroherpetonaceae*" clade

|                                        |                                                     |              |                      |       |                         |
|----------------------------------------|-----------------------------------------------------|--------------|----------------------|-------|-------------------------|
| <b>Chloroherpetonaceae</b><br>fam.nov. | <i>Cand. Thermochlorobacter aerophilum</i> RFM24133 | 33           | IAIVIDQFRYDYLERFEAYY | 78    | TSGGFKRLLKHGALFTNAHYR   |
|                                        | <i>Chlorobium</i> sp. 445                           | PI047328     | V-----L-----D-H-     | LPATR | -----IEQ-----L-----S    |
| <b>Ignavibacteriae</b>                 | <i>Chloroherpeton thalassium</i>                    | WP_012500094 | LT-----D---DMF       | VA--K | H----RK-R-Q--FMEKCF-D   |
|                                        | <i>Ignavibacteriaceae bacterium</i>                 | MBE2278926   | V-V-V--M-----QK-YPL- | --VGK | GD-----M-D-FNC--V--N    |
| <b>Other Bacteria</b>                  | <i>Thermaurantimonas aggregans</i>                  | WP_218019366 | VG--V--MK-E-----PL-  |       | S KN---A---SE-FFYK---N  |
|                                        | <i>Schleiferia thermophila</i>                      | WP_037361302 | VG--V--MK-E-----PLF  |       | S D---R-FT-Q-FN-K---N   |
|                                        | <i>Candidatus Kapabacteria bacteria</i>             | MBU3699324   | VVVSF----G--PRQ---VF |       | P -Q---R--M-E--T--SCR-E |
|                                        | <i>Seonamhaeicola maritimus</i>                     | WP_147769213 | V-----M-----T---SK-  |       | GE-----MIEE-FNCK-N-FN   |
|                                        | <i>Nonlabens agnitus</i>                            | WP_105981864 | VG--V--M-----T--YDR- |       | SN-----M-D-FSA--N--N    |
|                                        | <i>Echinicola rosea</i>                             | WP_137401383 | VG--V--M--E--HK-NDRF |       | -D-----MNE-FMMK---N     |
|                                        | <i>Cecembia rubra</i>                               | WP_106568470 | -G--V--M-QE-FYK---R- |       | SE-----M-D-FMMK---N     |
|                                        | <i>Echinicola vietnamensis</i>                      | WP_015265142 | VG--V--M--E--HK-NDRF |       | -D-----MND-FMMK---N     |
|                                        | <i>Flavobacteriaceae bacterium</i>                  | HAE71810     | VG--V--M---IS--WNG-  |       | SE-----V-E-FN-K-N--N    |
|                                        | <i>Echinicola soli</i>                              | WP_141613469 | VG--V--M--E--HK-NDRF |       | -D-----MND-FVMK---N     |
|                                        | <i>Echinicola shivajiensis</i>                      | WP_215225323 | VG--V--M--E--HK-HDR- |       | -E-----MHE-FMMK-G--N    |
|                                        | <i>Nonlabens xylanidelens</i>                       | WP_104515391 | VG--V--M-----S--YNR- |       | SD-----MNE-FNL--N--N    |
|                                        | <i>Ekhidna lutea</i>                                | WP_089358319 | VG--V--M---IS-YYSDf  |       | ED-----IEE-F-YR---N     |
|                                        | <i>Cyclobacteriaceae bacterium</i>                  | NOT77289     | VG--V--M-QE--Y---KKF |       | GP-----MSD-FMLK---N     |
|                                        | <i>Arcticibacter tournemirensis</i>                 | WP_161987516 | VG-I---M-----Y-YQDK- |       | SE-----GQ-F--RDT--N     |
|                                        | <i>Cecembia lonarensis</i>                          | WP_040400614 | VGL-V--M-QE-FYK--ER- |       | -E-----M-E-FMMK---N     |
|                                        | <i>Cecembia calidifontis</i>                        | WP_130275039 | VG--V--M-QE-FYK--ER- |       | SD-----M-E-FMMK---N     |
|                                        | <i>Algoriphagus marincola</i>                       | KPQ14508     | VG-IV--M-QE--Y--SDR- |       | SE-----M-E-FMMK-G--N    |
|                                        | <i>Pontibacter actiniarum</i>                       | WP_025608463 | VG--V--M-----Y-YWSK- |       | GND---K--SE-FS-R-T--N   |
|                                        | <i>Nonlabens dokdonensis</i>                        | WP_015360898 | VG--V--M-F---T--SSR- |       | -N--N--IND-YQL--N--N    |
|                                        | <i>Aureibaculum marinum</i>                         | WP_123896104 | -G--V--M-----T--YNK- |       | GE-----NS-YN-E---N      |
|                                        | <i>Hymenobacter metallilatus</i>                    | WP_125432143 | VG--V--M-----Y-YWNK- |       | G---R---GE-FSYE---N     |
|                                        | <i>Algoriphagus antarcticus</i>                     | WP_086541318 | VG-IV--M-Q---Y--SDR- |       | SD-----MM-D-FMMK-G--N   |
|                                        | <i>Hymenobacter wooponensis</i>                     | WP_135532231 | VG--V--M-----Y-YWSK- |       | GN---R---GE-FSYE---N    |
|                                        | <i>Pyrinomonadaceae bacterium</i>                   | MBA2502343   | LL--V-----GDLF       |       | APN-LRMM-RN--SW--TNFD   |
|                                        | <i>Seonamhaeicola algicola</i>                      | WP_147135211 | VG--V--M-----T---SK- |       | GN-----MIRE-YNCK-H--N   |
|                                        | <i>Hymenobacter lapidiphilus</i>                    | WP_176909843 | VG--V--M-----Y-YWSK- |       | G-----GE-FSYE-T--K      |
|                                        | <i>Gramella gaetbulicola</i>                        | WP_108172269 | VG--V--M-----T--WDQF |       | EN-----VND-FT-K-T-FN    |
|                                        | <i>Kordia jejudonensis</i>                          | WP_046756932 | VG-IV--M-----TQ--NK- |       | SE-----M-RE-FNCK-N--N   |
|                                        | <i>Mariniradius saccharolyticus</i>                 | WP_040480808 | VG--V--M-QE-FYK-QER- |       | -E-----MRE-FMM--G--N    |
|                                        | <i>Kordia antarctica</i>                            | WP_160129351 | -G--V--M-----TQ-D-K- |       | SE-----M-NG-YNCK-N--N   |
|                                        | <i>Nibribacter ruber</i>                            | WP_160691664 | VG--V--M-----Y-YWDK- |       | SND-----RE-FN-K-N--N    |
|                                        | <i>Aquimarina intermedia</i>                        | WP_148782777 | VG--V--M-----T--DTSF |       | G-----IS-E-FQYK--FN     |
|                                        | <i>Leptobacterium flavescens</i>                    | WP_163608315 | VG--V--M--N--T--WSK- |       | GN-----INE-FNCK-N--N    |
|                                        | <i>Tenacibaculum jejuense</i>                       | WP_095073954 | VG-IV--M-----T--DSK- |       | GE-----I-D-FSLE--FN     |
|                                        | <i>Nonlabens mediterranea</i>                       | MBF4982940   | VG--V--M-----T--YKR- |       | GD-----MND-FNL--N-FN    |
|                                        | <i>Psychroserpens damuponensis</i>                  | WP_040278820 | VG--V--M-----T--NK-  |       | SD-----MINQ-FNCK-N-FN   |
|                                        | <i>Nonlabens xiamenensis</i>                        | WP_124979762 | VG--V--M-----T--AHR- |       | GE--N--VRD-FNA--H--N    |
|                                        | <i>Hymenobacter gelipurpurascens</i>                | WP_088845355 | VG--V--M-----Y--WSK- |       | GN---R---GE-FSYE---N    |
|                                        | <i>Antarcticibacterium flavum</i>                   | WP_139067918 | VG--V--M-----T--WDK- |       | EE-----VRN-FN-R--FN     |
|                                        | <i>Rufibacter radiotolerans</i>                     | AKQ47831     | -G--V--M-----Y--WGKF |       | -ND-----VNQ-FS-Q-N--N   |
|                                        | <i>Urechidicola croceus</i>                         | WP_070236445 | VG--V--M-----T--YDK- |       | SE-----MNN-YNLK-T--N    |
|                                        | <i>Hymenobacter psychrophilus</i>                   | SDY42225     | VG--V--M-----Y-YWSK- |       | G-----GE-FSYE-T--N      |
|                                        | <i>Rufibacter glacialis</i>                         | KAA6431211   | -G--V--M-----Y-YWDK- |       | SAN-----AE-FN-R-N--N    |
|                                        | <i>Gramella sabulilitoris</i>                       | WP_143411027 | VG--V--M-----T--WGQ- |       | GQN----VNN-FV-K-N-FN    |
|                                        | <i>Mangrovimonas yunxiaonensis</i>                  | WP_036122168 | VG--V--M-----T---DR- |       | GD---N-MV-E-FNCK-N-FN   |
|                                        | <i>Belliella pelovolcani</i>                        | WP_076500269 | VG--V--M-QE-FYK-QER- |       | -E-----MND-FMM--G--N    |
|                                        | <i>Saprospiraceae bacterium</i>                     | MCB0575169   | -G--V--M-----Y-YRDS- |       | GE-----AQ-FSCF-T--N     |
|                                        | <i>Mesononia hippocampi</i>                         | WP_183478300 | VG--V--M-----T--WDK- |       | QAD----INE-FV-K-N-FN    |
|                                        | <i>Nonlabens marinus</i>                            | WP_041497300 | VG--V--M-----T--YSR- |       | GN-----MNE-FNV--N--N    |

Figure S47

Partial sequence alignment of the protein alkaline phosphatase family protein, showing a 5 aa insertion (boxed) that is specific for members of the "*Chloroherpetonaceae*" clade

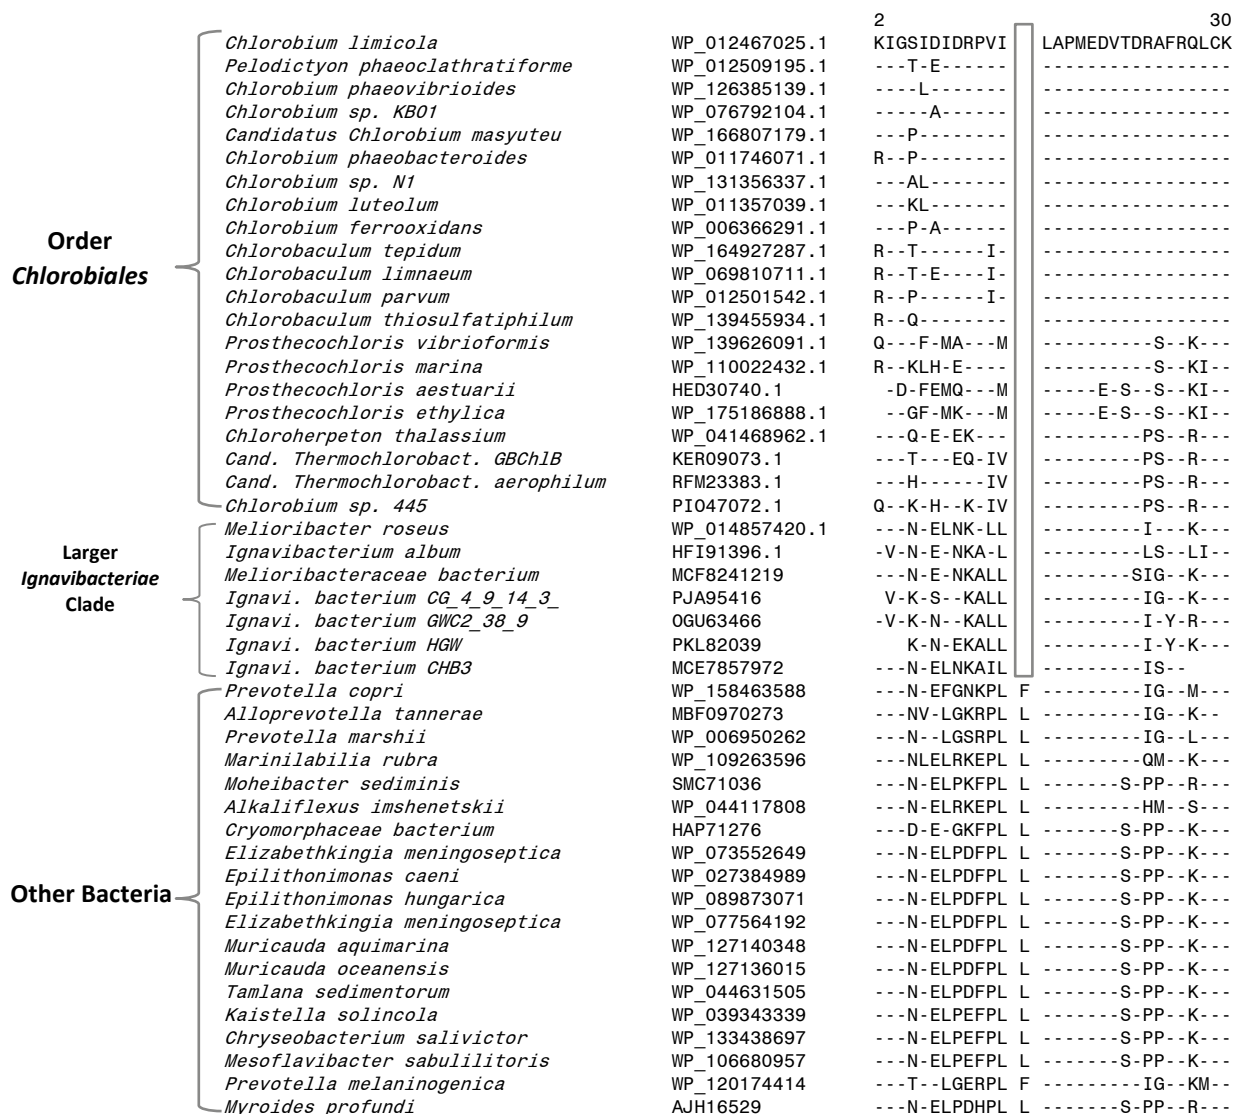

Figure S48

Partial sequence alignment of the protein tRNA dihydrouridine synthase DusB, showing a 1 aa deletion (boxed) that is specific for members of the order *Chlorobiales* and the “Larger Ignavibacteriae Clade”.
